# Supplementary material for: Regional burden of chronic kidney disease in North Africa and Middle East during 1990–2019; Results from Global Burden of Disease study 2019
Source: Frontiers journal article supplement (doi:10.3389/fpubh.2022.1015902), 2022-10-11
Supplement: Data_Sheet_2.PDF [file Data_Sheet_2.PDF]

Supplementary Fig. 2-A

1990

2019

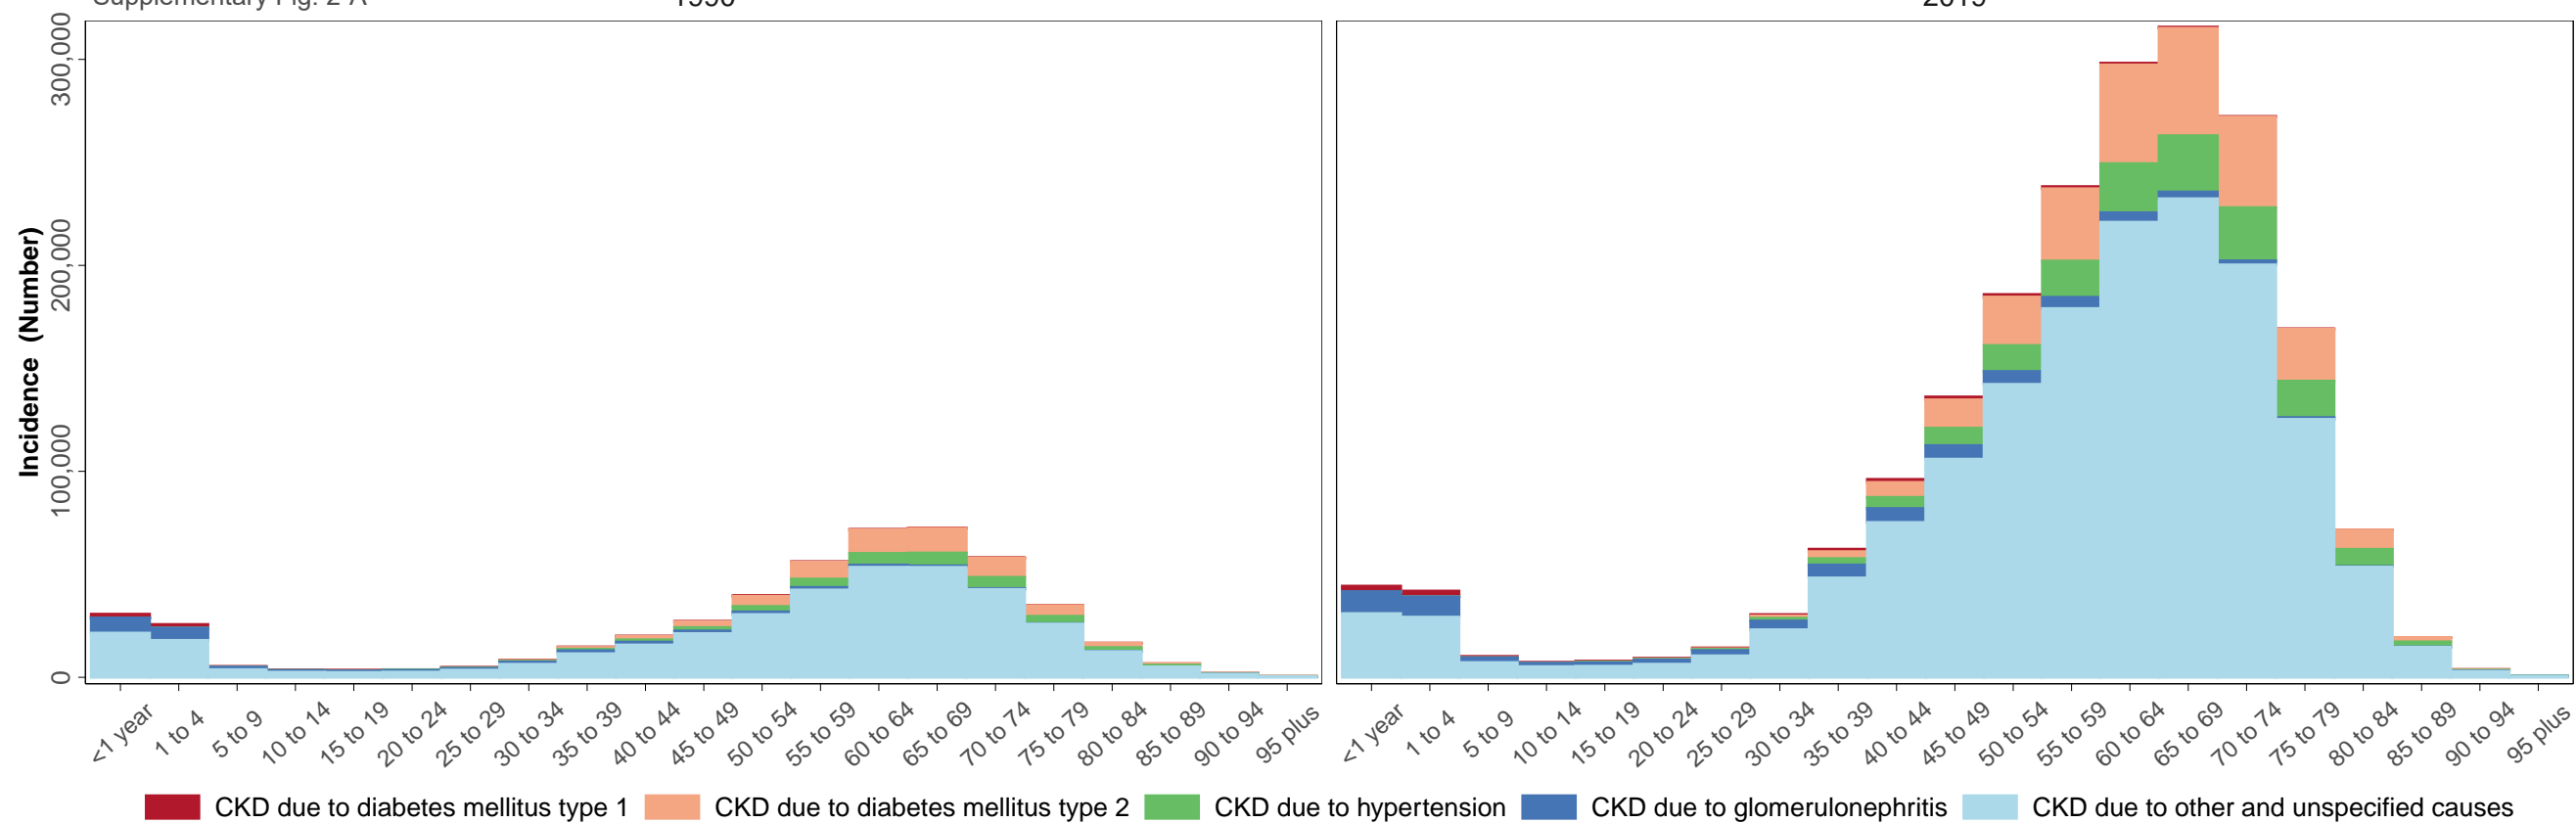

1990

2019

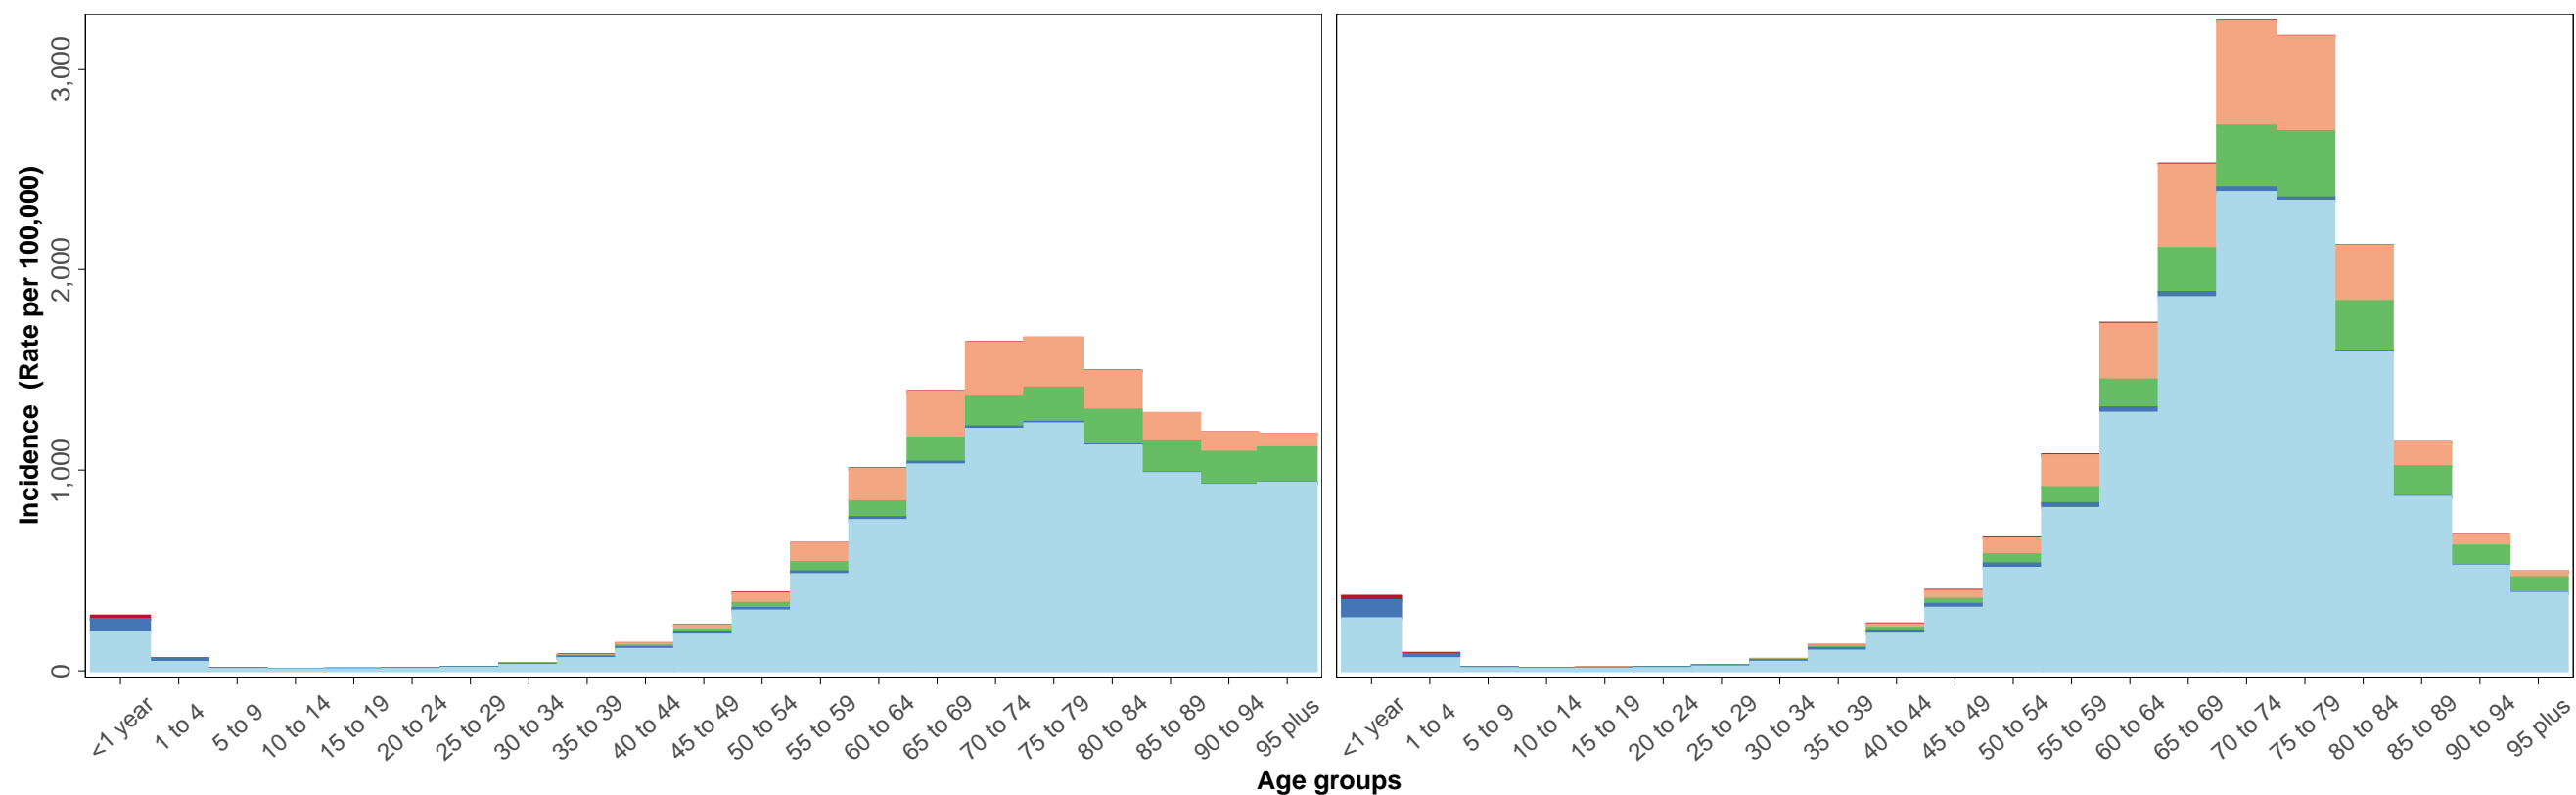

Supplementary Fig. 2-B

1990

2019

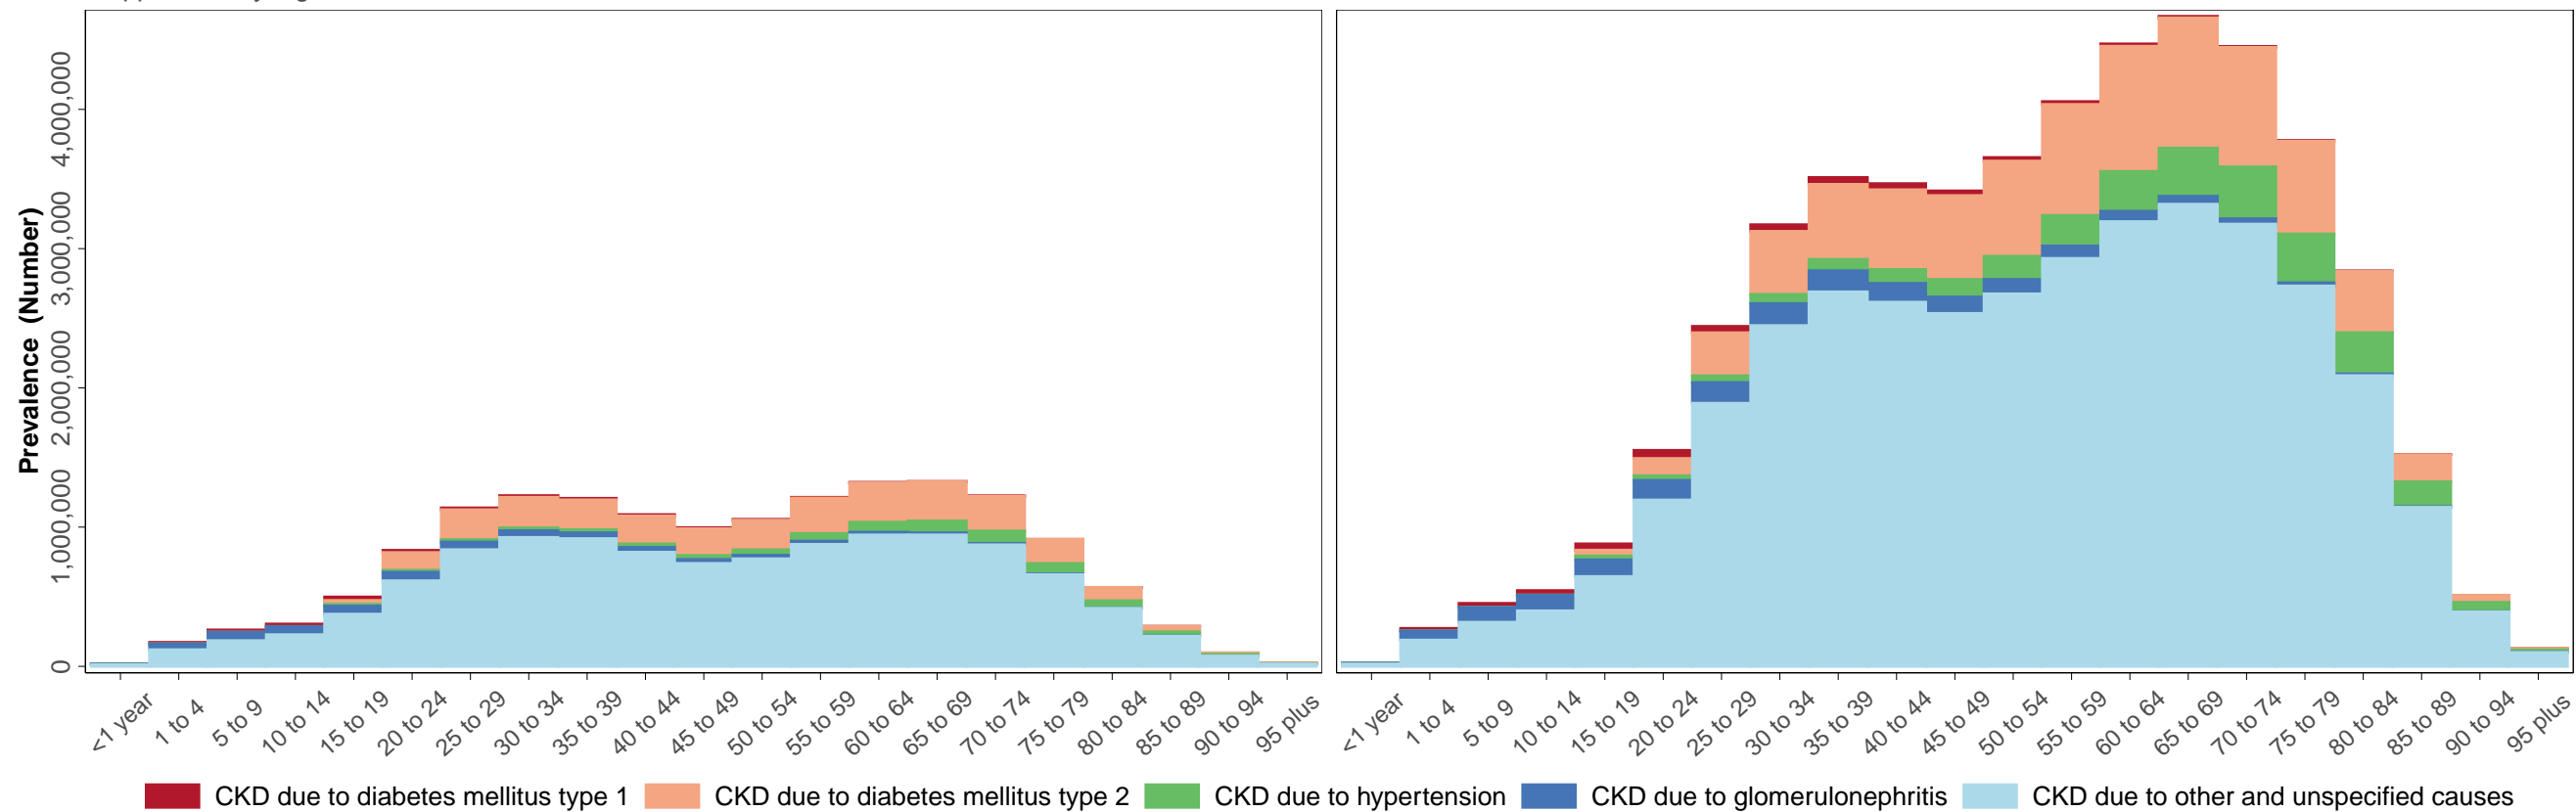

1990

2019

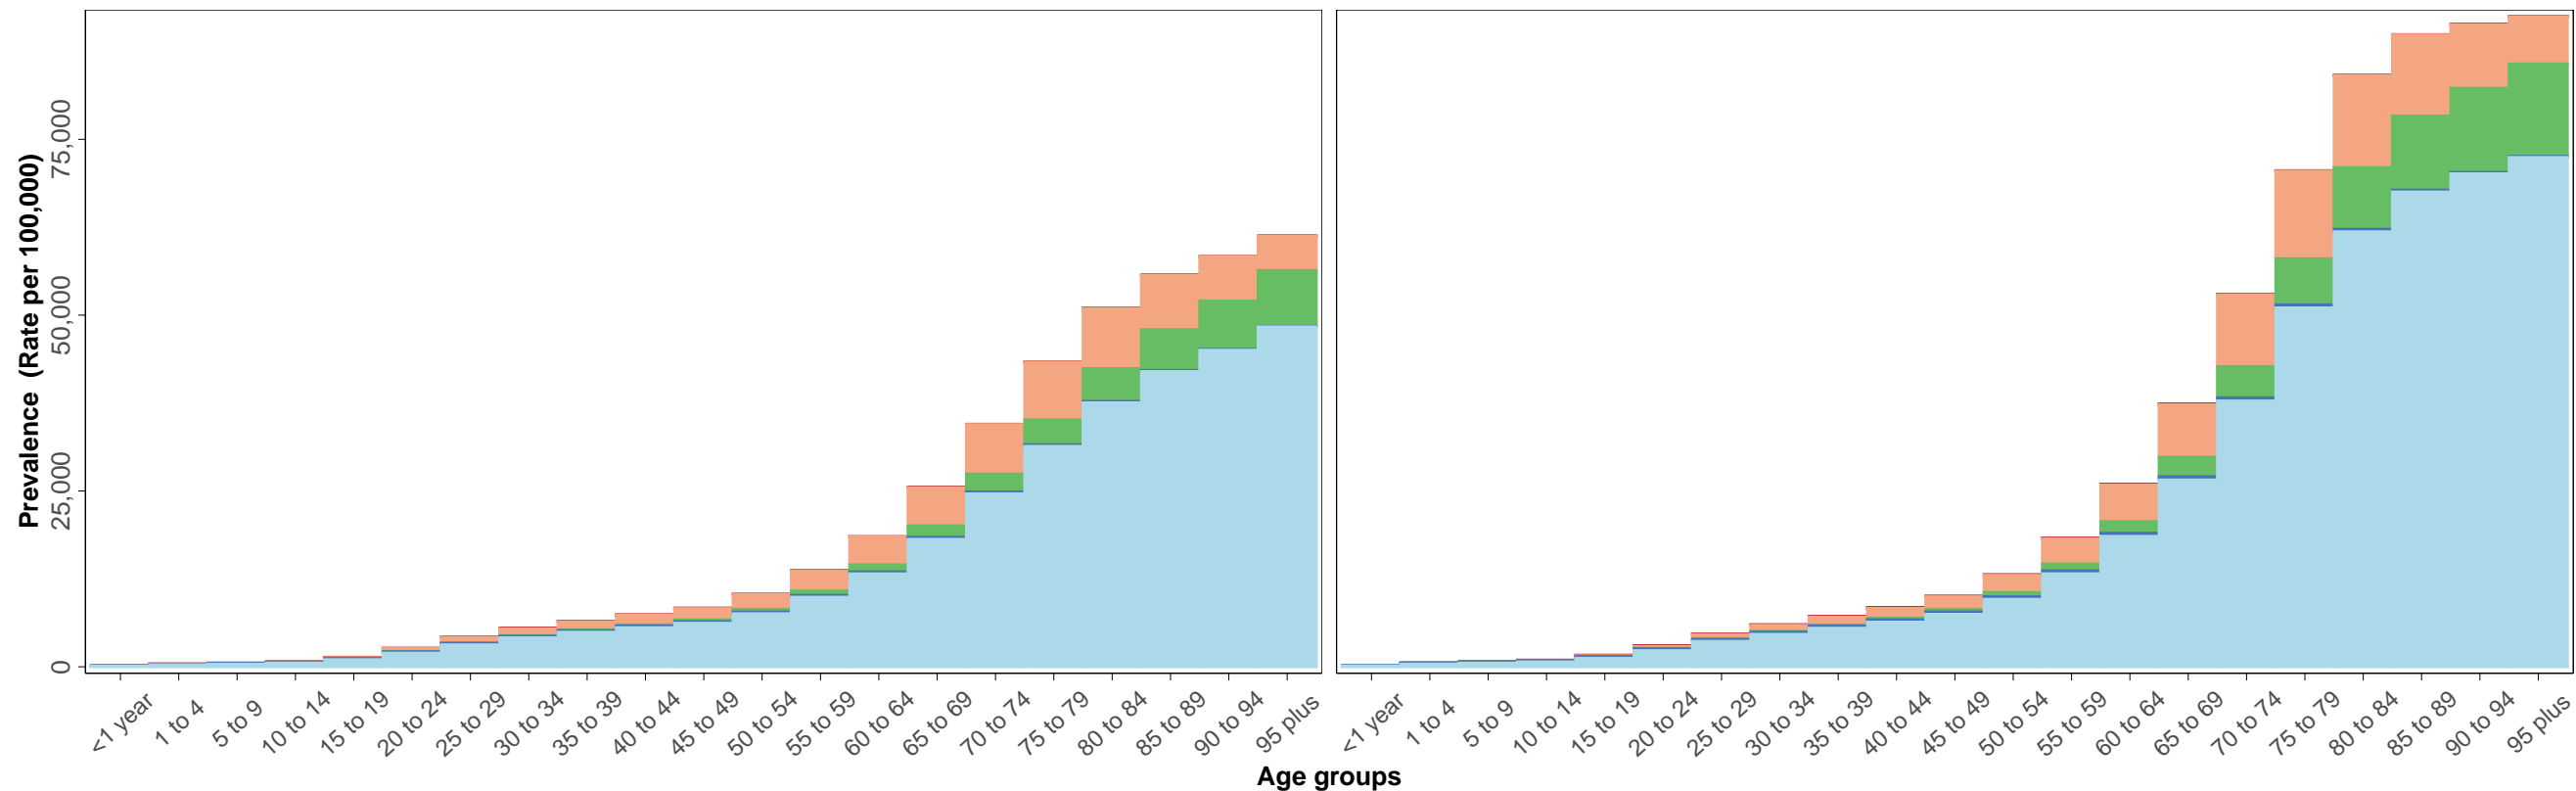

Supplementary Fig. 2-C

1990

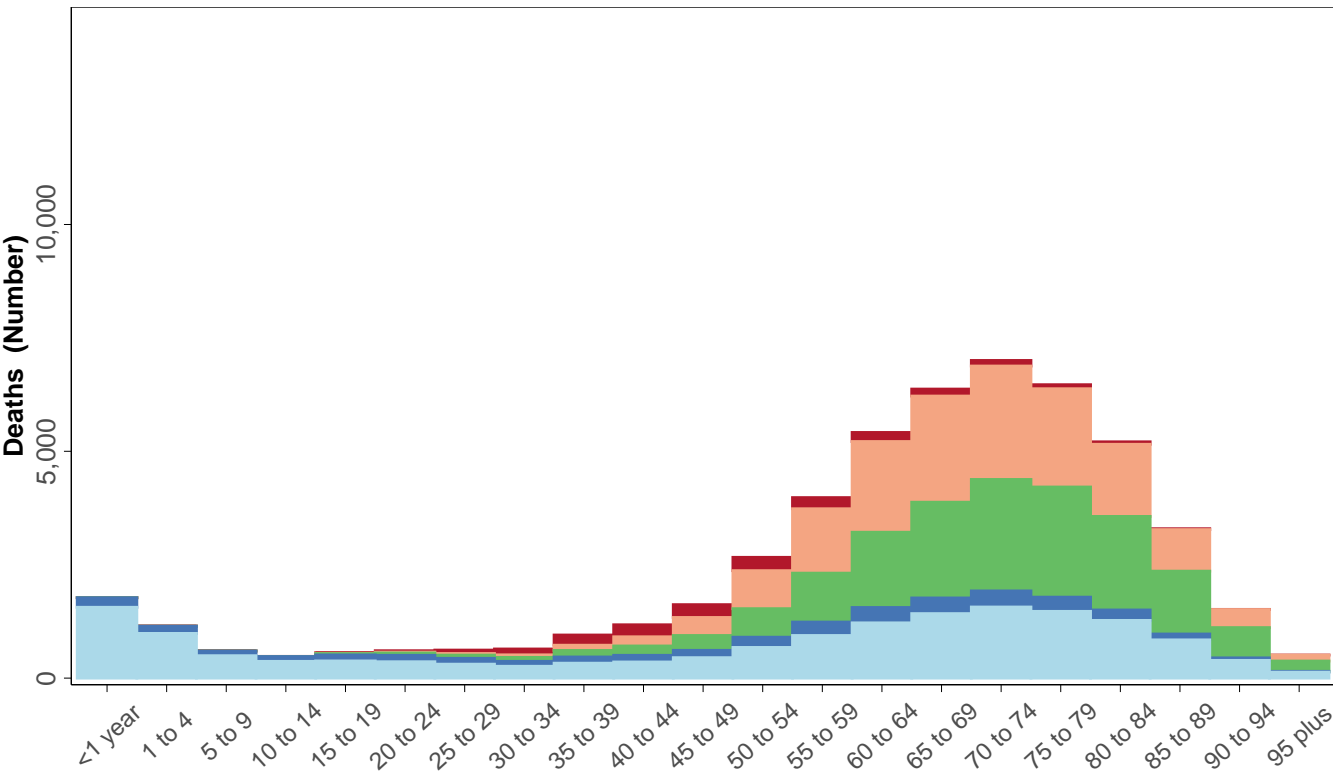

2019

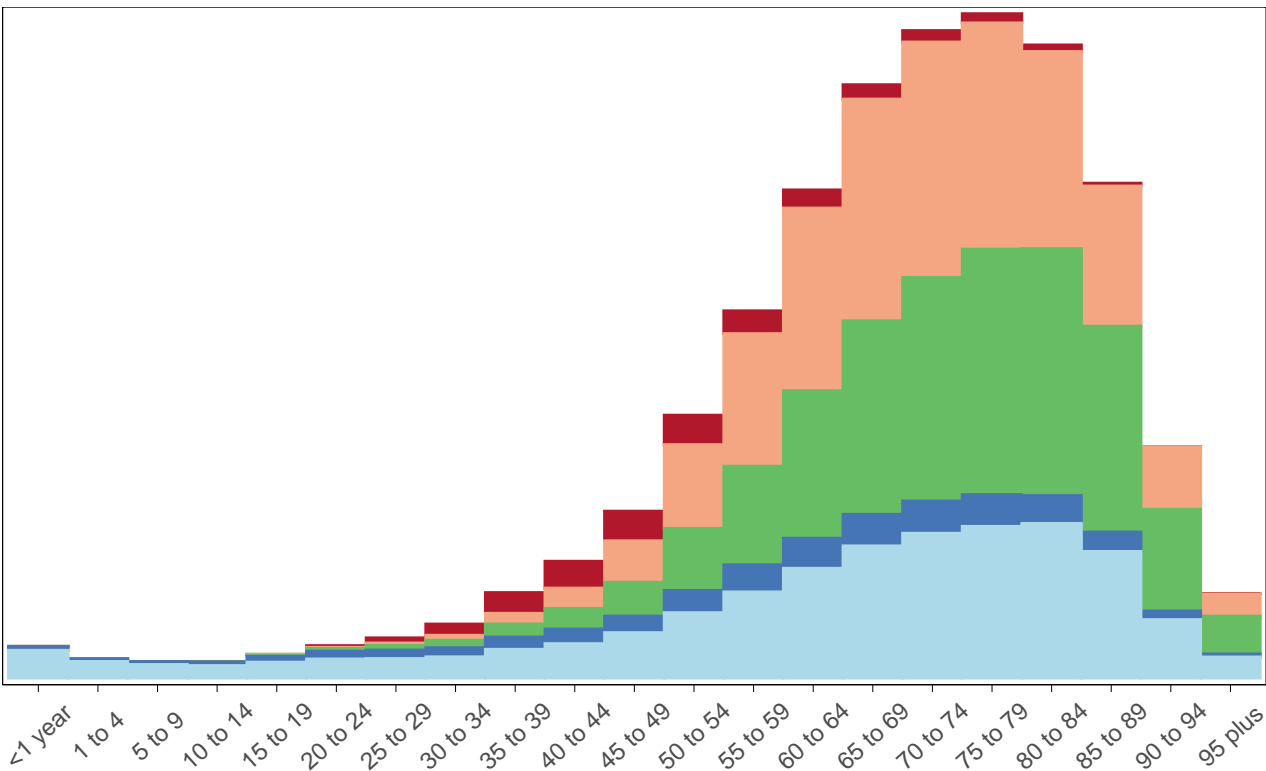

CKD due to diabetes mellitus type 1 CKD due to diabetes mellitus type 2 CKD due to hypertension CKD due to glomerulonephritis CKD due to other and unspecified causes

1990

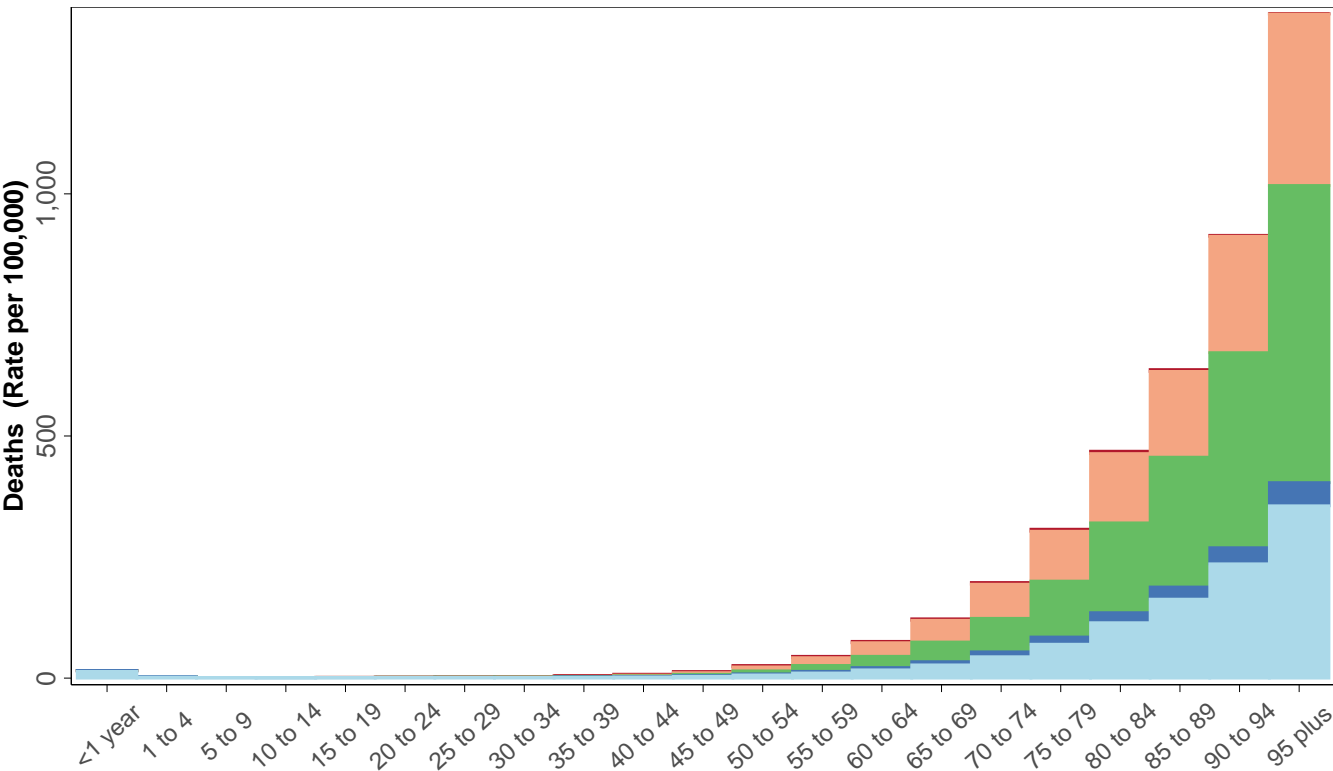

2019

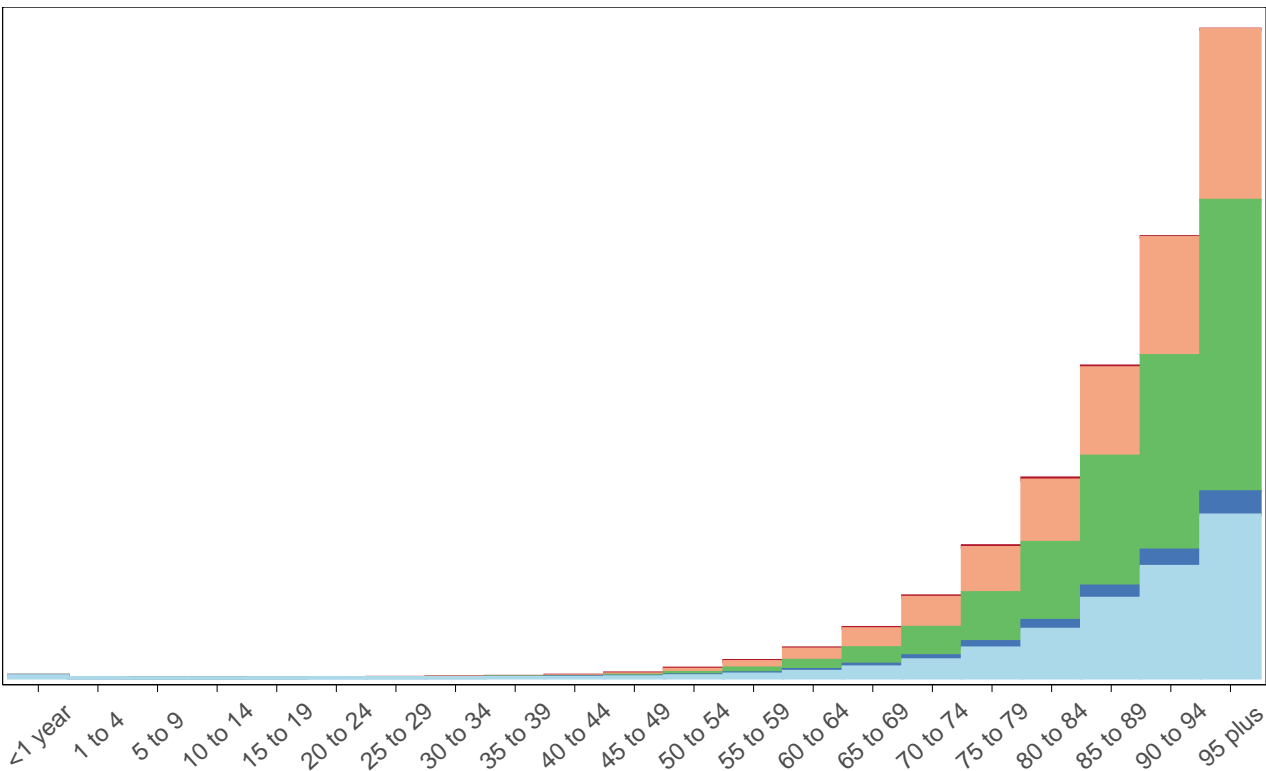

Age groups

Supplementary Fig. 2-D

1990

2019

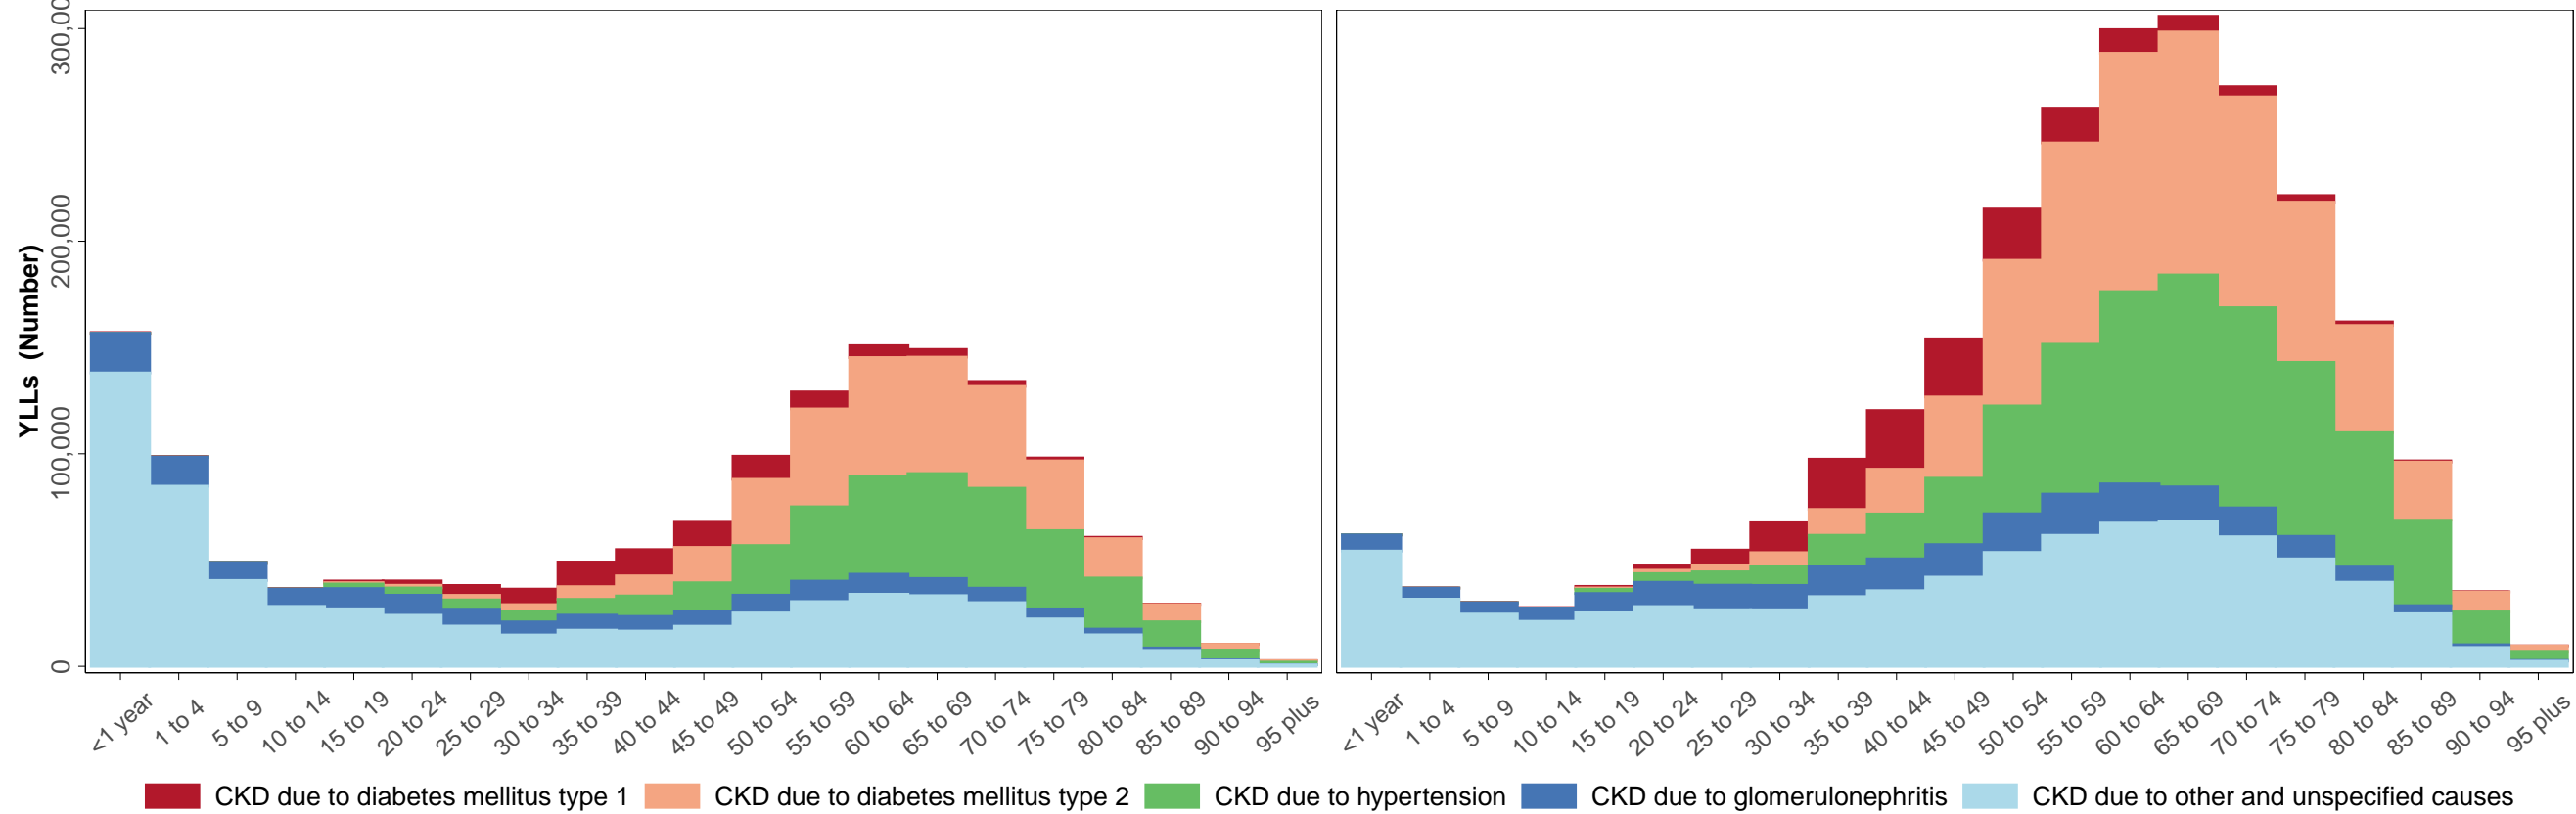

1990

2019

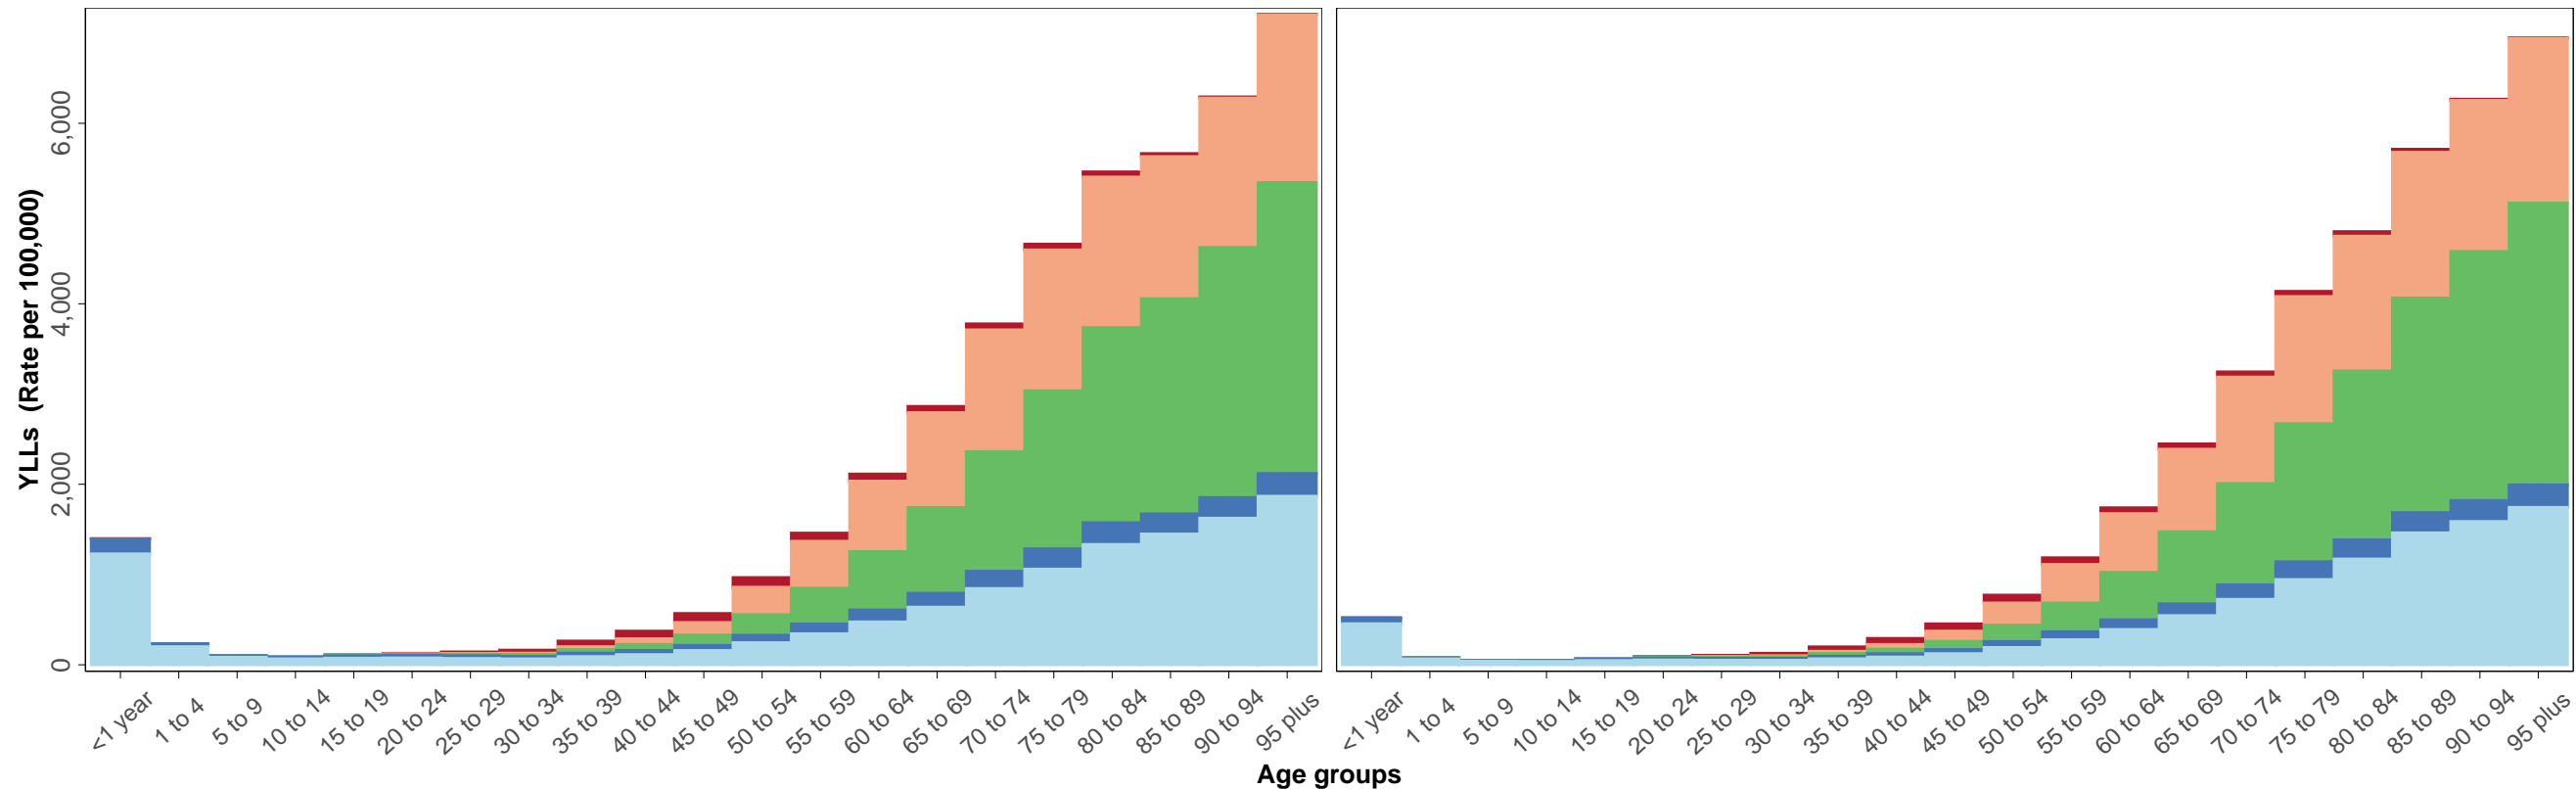

Supplementary Fig. 2-E

1990

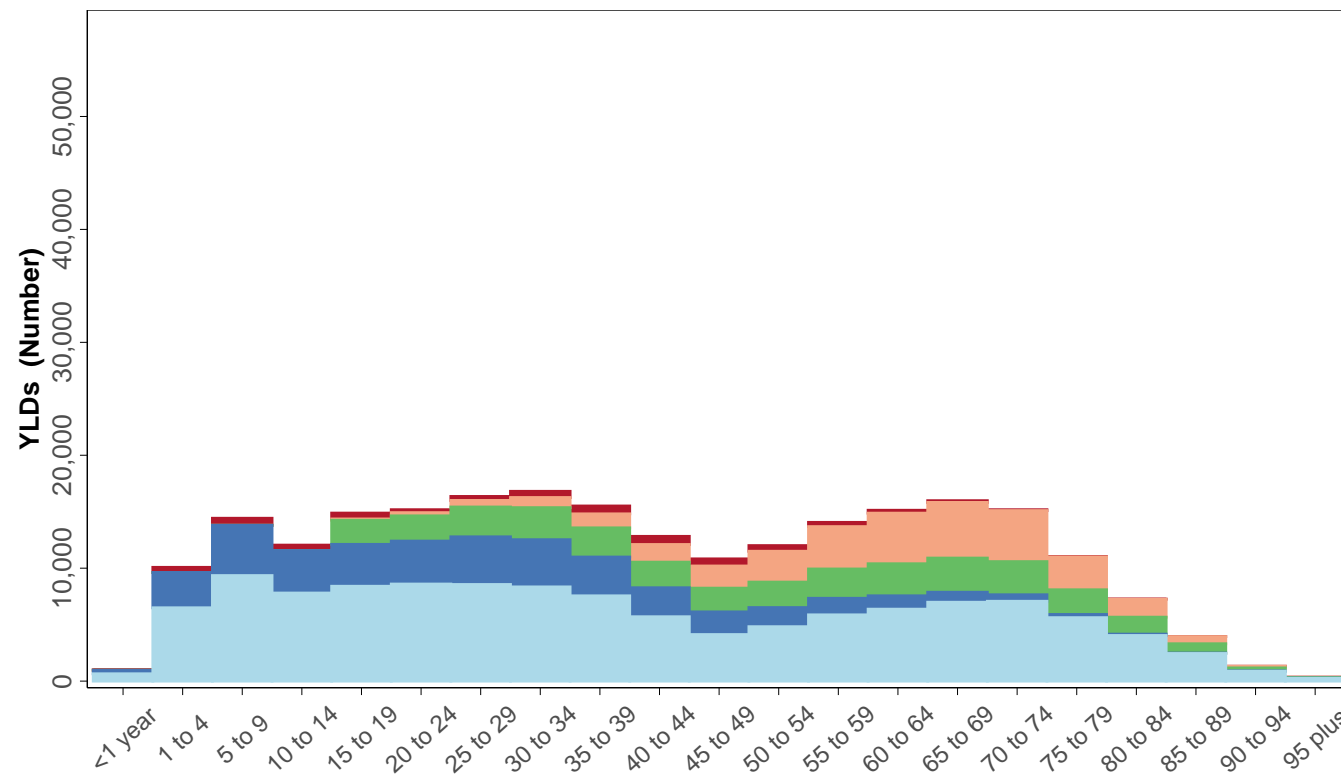

2019

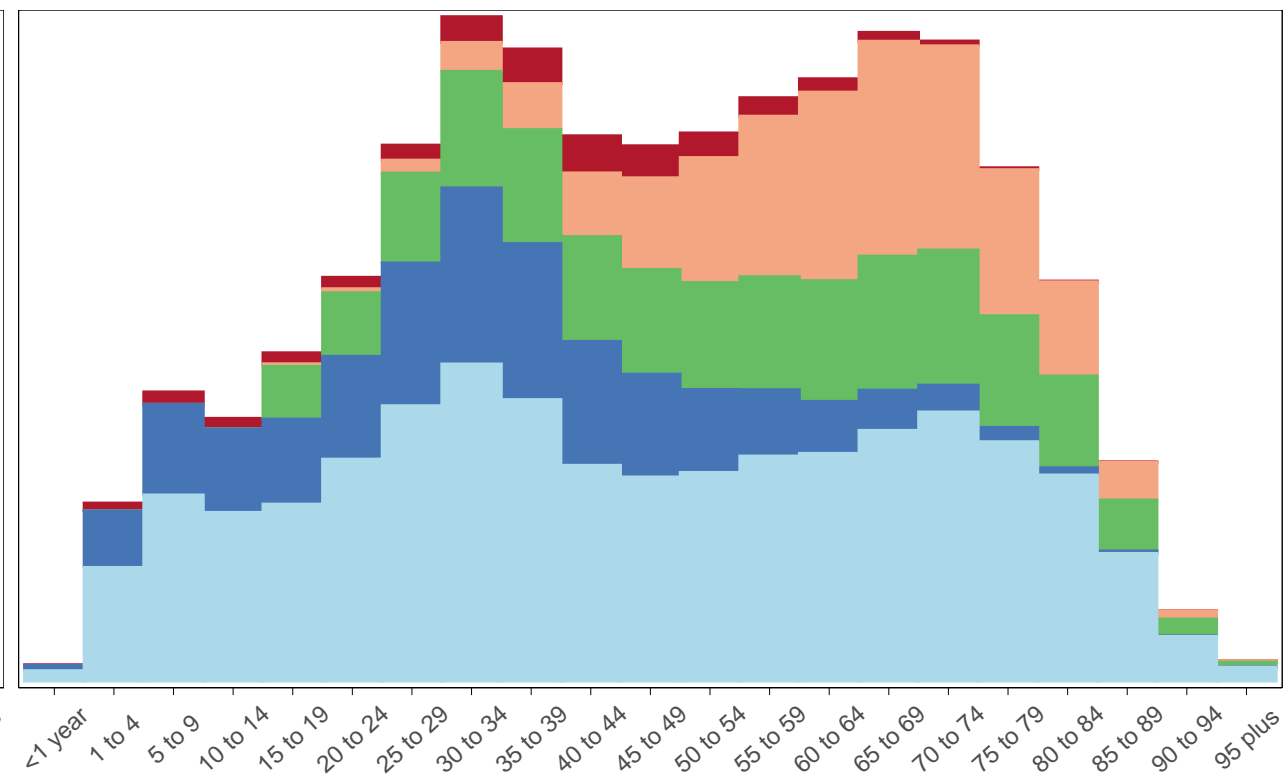

CKD due to diabetes mellitus type 1 CKD due to diabetes mellitus type 2 CKD due to hypertension CKD due to glomerulonephritis CKD due to other and unspecified causes

1990

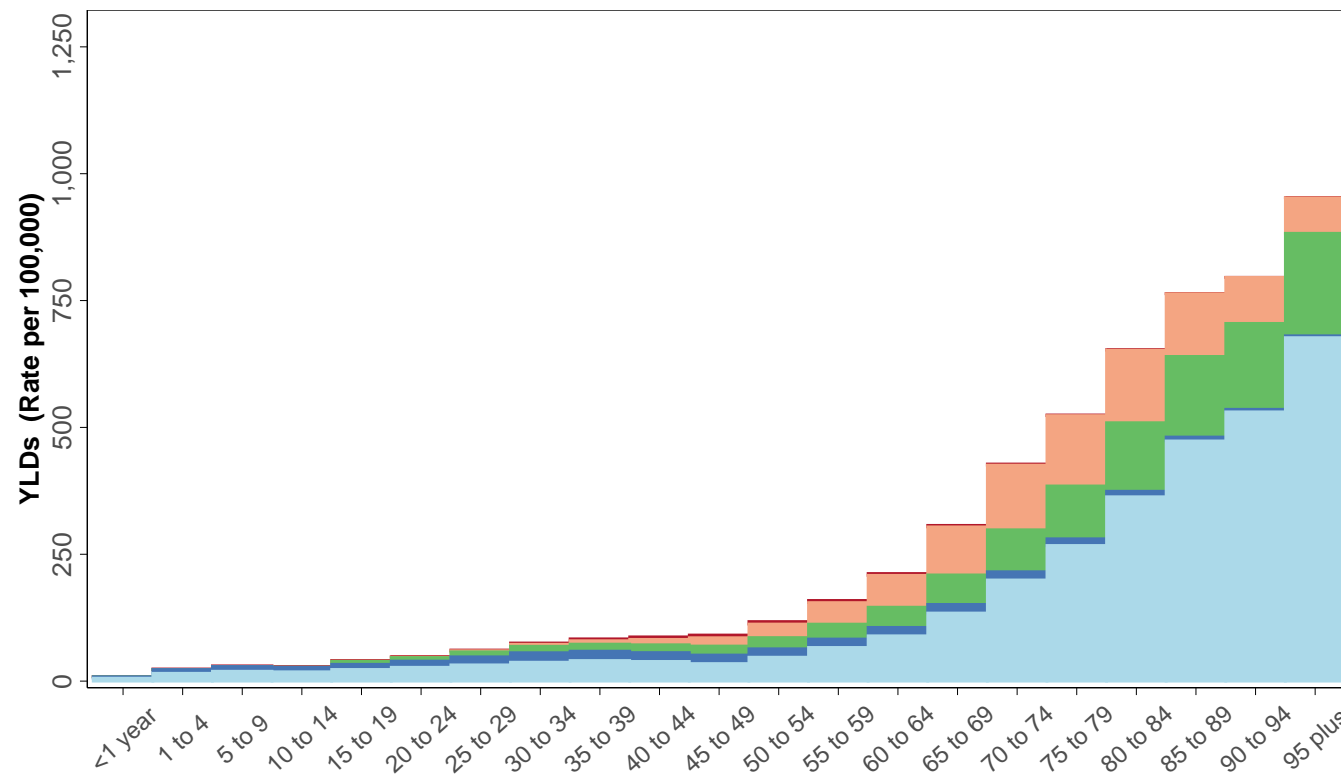

2019

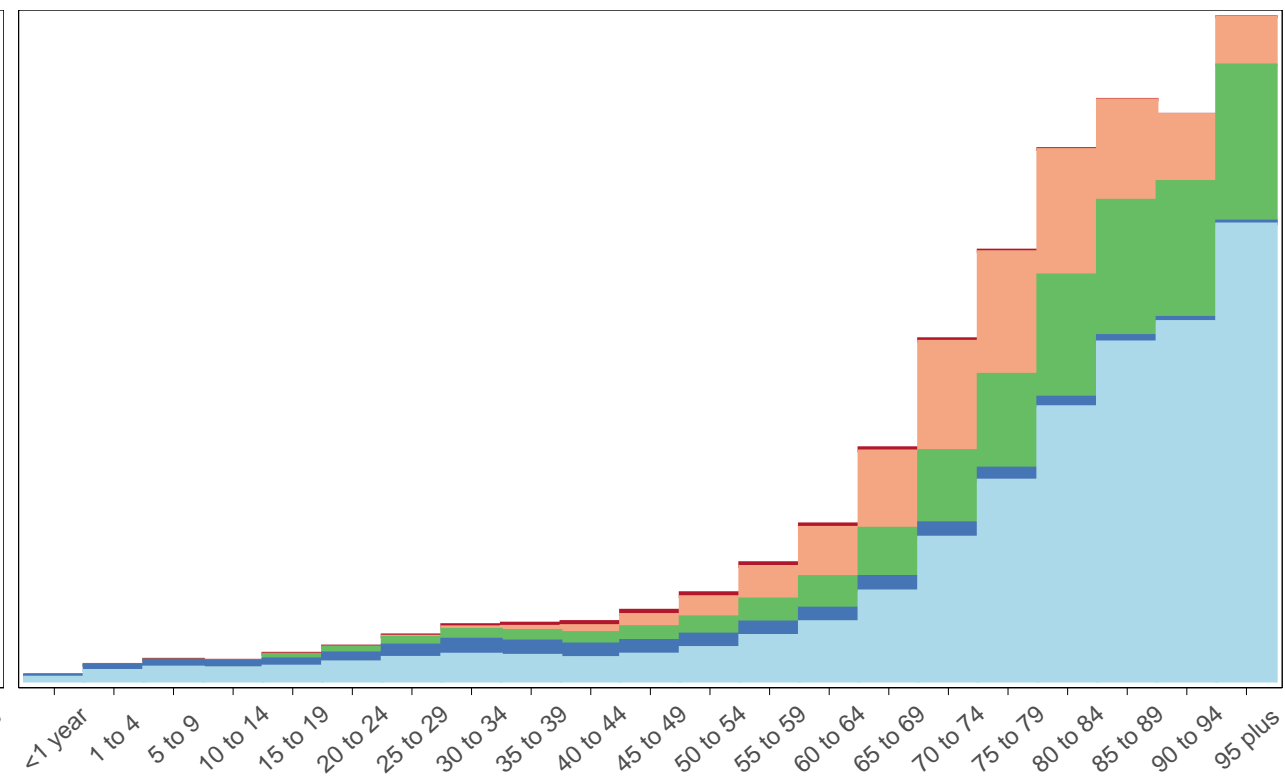

Age groups
