# Supplementary material for: Regional burden of chronic kidney disease in North Africa and Middle East during 1990–2019; Results from Global Burden of Disease study 2019
Source: Frontiers journal article supplement (doi:10.3389/fpubh.2022.1015902), 2022-10-11
Supplement: Data_Sheet_5.PDF [file Data_Sheet_5.PDF]

| Country     | Measure    | Age-standardized rate (per 100,000) |                                 |                                 |                                  |                                    |                                  | % Change (1990 to 2019) |                       |                      |
|-------------|------------|-------------------------------------|---------------------------------|---------------------------------|----------------------------------|------------------------------------|----------------------------------|-------------------------|-----------------------|----------------------|
|             |            | 1990                                |                                 |                                 | 2019                             |                                    |                                  |                         |                       |                      |
|             |            | Both                                | Female                          | Male                            | Both                             | Female                             | Male                             | Both                    | Female                | Male                 |
| Afghanistan | Incidence  | 242.22<br>(220.19 to 267.02)        | 287.3<br>(260.03 to 318.63)     | 199.59<br>(181.26 to 218.77)    | 385.21<br>(350.54 to 424.45)     | 419.63<br>(380.84 to 466.88)       | 348.45<br>(316.44 to 384.17)     | 59 (52.9 to 66.1)       | 46.1 (39.1 to 55.8)   | 74.6 (66.1 to 83.4)  |
|             | Prevalence | 7202<br>(6684.12 to 7702.91)        | 8337.6<br>(7724.13 to 8958.07)  | 6038.82<br>(5607.34 to 6450.77) | 9399.45<br>(8719.93 to 10084.15) | 10535.92<br>(9750.22 to 11381.38)  | 8254.16<br>(7668.78 to 8846.13)  | 30.5 (26.9 to 34.7)     | 26.4 (22.4 to 31.3)   | 36.7 (31.6 to 42.2)  |
|             | Deaths     | 55.94<br>(42.01 to 81.56)           | 54.6 (39.76 to 87.78)           | 56.69<br>(40.36 to 83.67)       | 49.37 (37.14 to 74.78)           | 50.06 (35.16 to 84.94)             | 48.5 (34.08 to 75.08)            | -11.7 (-33.2 to 12.5)   | -8.3 (-38.8 to 24.9)  | -14.4 (-35 to 8.2)   |
|             | DALYs      | 1436.89<br>(1121.17 to 1871.28)     | 1536.31<br>(1177.51 to 2125.22) | 1316.09<br>(987.59 to 1747.69)  | 1230.37<br>(958.38 to 1680.46)   | 1332.78<br>(1004.51 to 2027.76)    | 1127.75<br>(838.61 to 1582.04)   | -14.4 (-34.6 to 8.7)    | -13.2 (-39.8 to 14.4) | -14.3 (-34.3 to 10)  |
|             | YLLs       | 1333.56<br>(1024.72 to 1745.66)     | 1404.83<br>(1058.3 to 1992.49)  | 1242.77<br>(920.17 to 1681.45)  | 1077.91<br>(821.64 to 1523.53)   | 1150.72<br>(830.61 to 1850.97)     | 1004.15<br>(721.86 to 1464.05)   | -19.2 (-39.9 to 4.7)    | -18.1 (-45.3 to 12.3) | -19.2 (-39.8 to 6.8) |
|             | YLDs       | 103.33<br>(75.78 to 135.41)         | 131.48<br>(96.16 to 172.76)     | 73.32<br>(52.19 to 98.71)       | 152.46<br>(111.77 to 202.44)     | 182.05<br>(133.69 to 237.05)       | 123.6 (87.14 to 170.69)          | 47.5 (36.7 to 59.1)     | 38.5 (26.8 to 51.1)   | 68.6 (51 to 88.1)    |
| Algeria     | Incidence  | 270.77<br>(246.98 to 299.05)        | 324.05<br>(293.59 to 360.19)    | 215.7<br>(195.75 to 238.02)     | 453.09<br>(416.04 to 493.02)     | 498.47<br>(458.4 to 541.73)        | 408.53<br>(371.6 to 450.16)      | 67.3 (60.8 to 73.7)     | 53.8 (46.4 to 61.9)   | 89.4 (78.4 to 100.6) |
|             | Prevalence | 7757.7<br>(7236.3 to 8306.92)       | 9033.16<br>(8387.26 to 9698.29) | 6525.29<br>(6099.91 to 6971.21) | 10666<br>(9928.08 to 11407.85)   | 11942.07<br>(11119.76 to 12745.91) | 9431.75<br>(8743.75 to 10136.71) | 37.5 (33.3 to 41.3)     | 32.2 (27.6 to 36.9)   | 44.5 (38.6 to 50.7)  |
|             | Deaths     | 38.73<br>(30.35 to 52.07)           | 41.59 (29.92 to 66.88)          | 36.54<br>(28.62 to 47.42)       | 31.57 (24.78 to 41.16)           | 38.26 (28.6 to 54.35)              | 26.83 (20.54 to 35.7)            | -18.5 (-36.6 to 5.9)    | -8 (-31.6 to 23.1)    | -26.6 (-45.4 to 1.9) |
|             | DALYs      | 839.66<br>(668.56 to 1130.07)       | 928.59<br>(701.22 to 1448.44)   | 757.92<br>(606.65 to 965.86)    | 701.53<br>(567.99 to 889.89)     | 814.68<br>(634.16 to 1082.32)      | 604.46<br>(475.09 to 793.44)     | -16.5 (-34 to 4.9)      | -12.3 (-34.4 to 12.1) | -20.2 (-38.9 to 5.9) |
|             | YLLs       | 736.53<br>(573.89 to 1018.1)        | 800.16<br>(580.4 to 1314.47)    | 678.96<br>(529.74 to 884.79)    | 544.25<br>(424.32 to 720.35)     | 638.2<br>(471.56 to 900.48)        | 465.81<br>(353.71 to 641.74)     | -26.1 (-43.8 to -3.3)   | -20.2 (-42.3 to 7.1)  | -31.4 (-50 to -3.1)  |
|             | YLDs       | 103.13<br>(75.42 to 137.36)         | 128.43<br>(94.06 to 172.16)     | 78.96<br>(56.26 to 104.75)      | 157.28<br>(113.64 to 209.64)     | 176.49<br>(129.91 to 232.69)       | 138.65<br>(96.92 to 188.89)      | 52.5 (39.5 to 66.2)     | 37.4 (23.3 to 51.9)   | 75.6 (55.9 to 98.1)  |

| Country | Measure    | Age-standardized rate (per 100,000) |                                 |                                 |                                    |                                    |                                  | % Change (1990 to 2019) |                      |                       |
|---------|------------|-------------------------------------|---------------------------------|---------------------------------|------------------------------------|------------------------------------|----------------------------------|-------------------------|----------------------|-----------------------|
|         |            | 1990                                |                                 |                                 | 2019                               |                                    |                                  |                         |                      |                       |
|         |            | Both                                | Female                          | Male                            | Both                               | Female                             | Male                             | Both                    | Female               | Male                  |
| Bahrain | Incidence  | 305.9<br>(280.84 to 334.32)         | 365.35<br>(333.64 to 399.99)    | 259.03<br>(234.58 to 284.73)    | 502.93<br>(462.61 to 547.12)       | 537.64<br>(495.64 to 581.17)       | 484.36<br>(442.42 to 529.22)     | 64.4 (56.7 to 72.3)     | 47.2 (39.2 to 55.3)  | 87 (75.4 to 98.6)     |
|         | Prevalence | 8242.7<br>(7701.66 to 8781.87)      | 9655.11<br>(8967.62 to 10331.7) | 7120.38<br>(6648.18 to 7566.87) | 11346.5<br>(10610.04 to 12130.92)  | 12548.52<br>(11732.04 to 13376.91) | 10625.92<br>(9877.1 to 11424.8)  | 37.7 (33.2 to 42.1)     | 30 (24.9 to 35.2)    | 49.2 (42.7 to 55.6)   |
|         | Deaths     | 38.45<br>(31.97 to 46.81)           | 39 (30.4 to 48.19)              | 38.56 (31.2 to 51.06)           | 34.82 (27.94 to 42.19)             | 35.06 (27.23 to 42.58)             | 34.82 (27.27 to 44.83)           | -9.5 (-29.6 to 13.1)    | -10.1 (-34 to 16)    | -9.7 (-31.4 to 17.1)  |
|         | DALYs      | 781.67<br>(663.36 to 936.29)        | 838.28<br>(673.39 to 1025.72)   | 743.8<br>(613.21 to 960.54)     | 711.89<br>(588.82 to 844.68)       | 725.55<br>(589.93 to 865.63)       | 707.16<br>(570.76 to 875.91)     | -8.9 (-26.2 to 11)      | -13.4 (-32 to 7.9)   | -4.9 (-24.9 to 18.3)  |
|         | YLLs       | 669.58<br>(556.61 to 817.38)        | 700.74<br>(543.23 to 865.25)    | 651.74<br>(525.92 to 865.53)    | 540.74<br>(434.43 to 663.67)       | 546.88<br>(423.36 to 669.52)       | 540.66<br>(421.89 to 697.7)      | -19.2 (-37.2 to 2.2)    | -22 (-42.4 to 3)     | -17 (-36.2 to 8.4)    |
|         | YLDs       | 112.09<br>(81.83 to 147.93)         | 137.54<br>(100.02 to 181.43)    | 92.06<br>(65.81 to 123.61)      | 171.16<br>(122.34 to 228.68)       | 178.67<br>(129.66 to 235.44)       | 166.5<br>(114.97 to 228.84)      | 52.7 (37.6 to 68.9)     | 29.9 (15.4 to 45.3)  | 80.9 (60 to 103.7)    |
| Egypt   | Incidence  | 275.6<br>(251.68 to 303.43)         | 344.75<br>(312.87 to 382.49)    | 206.75<br>(187.77 to 226.9)     | 473.45<br>(434.48 to 516.23)       | 530.89<br>(485.27 to 575.35)       | 421.61<br>(384.56 to 463.38)     | 71.8 (66.1 to 78.1)     | 54 (47.1 to 61.2)    | 103.9 (93.6 to 114.1) |
|         | Prevalence | 7727.2<br>(7179.19 to 8259.92)      | 9152.72<br>(8499.55 to 9868.91) | 6303.45<br>(5868.17 to 6721.77) | 10929.08<br>(10176.81 to 11678.59) | 12417.16<br>(11528.24 to 13298.44) | 9680.27<br>(8979.43 to 10400.59) | 41.4 (37.8 to 45.4)     | 35.7 (31.3 to 40.2)  | 53.6 (47.5 to 60.4)   |
|         | Deaths     | 39.39<br>(27.32 to 49.32)           | 44.48 (25.51 to 58.94)          | 34.19<br>(26.87 to 44.77)       | 43.93 (26.96 to 61.79)             | 57.52 (26.85 to 81.21)             | 35.99 (23.17 to 58.5)            | 11.5 (-17 to 44.5)      | 29.3 (-13.3 to 67.9) | 5.2 (-28.3 to 45.7)   |
|         | DALYs      | 916.35<br>(675.75 to 1090.29)       | 1062.84<br>(672.72 to 1346.43)  | 770.43<br>(626.65 to 985.63)    | 1009.46<br>(660.38 to 1386.31)     | 1217.98<br>(664.54 to 1653.14)     | 862.38<br>(577.16 to 1319.46)    | 10.2 (-13.8 to 37.8)    | 14.6 (-15.7 to 45)   | 11.9 (-17.6 to 46.9)  |
|         | YLLs       | 807.9<br>(569.11 to 974.64)         | 925.99<br>(543.86 to 1198.42)   | 690.16<br>(545.35 to 902.49)    | 837.02<br>(493.06 to 1200.31)      | 1023.91<br>(470.08 to 1463.85)     | 708.67<br>(432.18 to 1170.5)     | 3.6 (-23.6 to 35.4)     | 10.6 (-25 to 45.2)   | 2.7 (-30.8 to 42.8)   |
|         | YLDs       | 108.45<br>(79.97 to 144.2)          | 136.86<br>(99.81 to 181.32)     | 80.27<br>(57.91 to 108.11)      | 172.44<br>(126.24 to 228.81)       | 194.07<br>(142.8 to 254.31)        | 153.71<br>(109.48 to 208.66)     | 59 (45.8 to 73.2)       | 41.8 (28.1 to 56.5)  | 91.5 (71 to 113.7)    |

| Country                    | Measure    | Age-standardized rate (per 100,000) |                                   |                                 |                                   |                                    |                                   | % Change (1990 to 2019) |                        |                        |
|----------------------------|------------|-------------------------------------|-----------------------------------|---------------------------------|-----------------------------------|------------------------------------|-----------------------------------|-------------------------|------------------------|------------------------|
|                            |            | 1990                                |                                   |                                 | 2019                              |                                    |                                   |                         |                        |                        |
|                            |            | Both                                | Female                            | Male                            | Both                              | Female                             | Male                              | Both                    | Female                 | Male                   |
| Iran (Islamic Republic of) | Incidence  | 312.23<br>(284.08 to 342.21)        | 358.33<br>(325.89 to 395.44)      | 270.82<br>(246.25 to 297.71)    | 420.53<br>(387.18 to 456.71)      | 467.58<br>(430.5 to 505.92)        | 371.76<br>(342.17 to 404.45)      | 34.7 (30.8 to 38.8)     | 30.5 (25.6 to 35.5)    | 37.3 (33.6 to 41.3)    |
|                            | Prevalence | 9008.18<br>(8386.73 to 9607.92)     | 10067.73<br>(9364.73 to 10744.79) | 7969.96<br>(7428.28 to 8476.37) | 10773.42<br>(10101.1 to 11422.81) | 11941.71<br>(11186.09 to 12660.97) | 9617.82<br>(9031.23 to 10215.65)  | 19.6 (17.7 to 21.8)     | 18.6 (16.3 to 21.1)    | 20.7 (18.8 to 22.9)    |
|                            | Deaths     | 24.11<br>(21.79 to 28.8)            | 22.64 (19.56 to 31.52)            | 25.58<br>(22.49 to 28.39)       | 19.77 (17.77 to 21.21)            | 19.39 (17.35 to 20.92)             | 20.17 (18.01 to 22.03)            | -18 (-35.4 to -10.8)    | -14.3 (-42.8 to -3.3)  | -21.2 (-31.2 to -9)    |
|                            | DALYs      | 620.34<br>(569.14 to 676.86)        | 602.05<br>(537.89 to 694.94)      | 636.01<br>(564.4 to 696.04)     | 486.68<br>(443.93 to 530.46)      | 475.62<br>(427.17 to 522.38)       | 498.03<br>(455.21 to 545.91)      | -21.5 (-28.8 to -15.4)  | -21 (-33.2 to -13.5)   | -21.7 (-28.6 to -11.4) |
|                            | YLLs       | 507.44<br>(463.24 to 556.81)        | 474 (419.73 to 569.46)            | 538.79<br>(471.68 to 590.83)    | 360.47<br>(333.67 to 382.16)      | 341.61<br>(312.46 to 365.75)       | 379.22<br>(348.64 to 409.94)      | -29 (-36.4 to -22.5)    | -27.9 (-42.3 to -18.9) | -29.6 (-36.4 to -18.4) |
|                            | YLDs       | 112.9<br>(82.68 to 148.1)           | 128.05<br>(94.04 to 168.23)       | 97.22<br>(70.68 to 127.73)      | 126.21<br>(91.53 to 165.66)       | 134.02<br>(97.51 to 176.3)         | 118.81<br>(85.21 to 158.84)       | 11.8 (4.9 to 18.9)      | 4.7 (-3.7 to 12.8)     | 22.2 (13.5 to 30.2)    |
| Iraq                       | Incidence  | 302.88<br>(276.4 to 333.27)         | 352.49<br>(320.13 to 389.56)      | 252.06 (228 to 279.42)          | 484.35<br>(445.33 to 526.24)      | 518.19<br>(477.78 to 563.82)       | 451.06<br>(410.21 to 492.24)      | 59.9 (53.8 to 65.9)     | 47 (40 to 54.1)        | 78.9 (69.9 to 89.5)    |
|                            | Prevalence | 8584.87<br>(8016.51 to 9162.67)     | 9848.36<br>(9204.14 to 10519.87)  | 7288.12<br>(6776.58 to 7816.93) | 11560.45<br>(10782.49 to 12343)   | 12653.02<br>(11795.81 to 13527.19) | 10461.05<br>(9715.55 to 11245.04) | 34.7 (30.8 to 38.3)     | 28.5 (24.3 to 33.2)    | 43.5 (37.7 to 49.1)    |
|                            | Deaths     | 46.27<br>(37.12 to 61.87)           | 44.64 (33.52 to 66.33)            | 48.44<br>(37.34 to 68.84)       | 41.86 (33.19 to 53.49)            | 35.34 (27.56 to 45.77)             | 49.93 (36.9 to 72.49)             | -9.5 (-30.1 to 11.5)    | -20.8 (-43.5 to 7.8)   | 3.1 (-24 to 35.6)      |
|                            | DALYs      | 1126.83<br>(933.87 to 1407.75)      | 1154.23<br>(904.06 to 1603.06)    | 1104.95<br>(875.39 to 1414.94)  | 991.2<br>(797.31 to 1215.04)      | 905.37<br>(709.55 to 1133.98)      | 1091.92<br>(833.62 to 1403.18)    | -12 (-30.2 to 8.2)      | -21.6 (-41.4 to 3.2)   | -1.2 (-24.6 to 27.1)   |
|                            | YLLs       | 996.98<br>(808.42 to 1279.53)       | 998.43<br>(753.7 to 1438.19)      | 1001.28<br>(774.72 to 1310.77)  | 802.01<br>(615.85 to 1021.42)     | 702.24<br>(523.99 to 941.05)       | 916 (676.71 to 1226.47)           | -19.6 (-38.9 to 2.9)    | -29.7 (-50.2 to -2)    | -8.5 (-33.5 to 21.7)   |
|                            | YLDs       | 129.85<br>(94.65 to 171.37)         | 155.81<br>(114.03 to 204.35)      | 103.66<br>(74.25 to 138.69)     | 189.19<br>(138.29 to 248.21)      | 203.14<br>(149.5 to 262.16)        | 175.93<br>(124.91 to 238.81)      | 45.7 (34.2 to 57.5)     | 30.4 (18.4 to 42.9)    | 69.7 (52.5 to 89.4)    |

| Country | Measure    | Age-standardized rate (per 100,000) |                                   |                                 |                                    |                                    |                                   | % Change (1990 to 2019) |                        |                        |
|---------|------------|-------------------------------------|-----------------------------------|---------------------------------|------------------------------------|------------------------------------|-----------------------------------|-------------------------|------------------------|------------------------|
|         |            | 1990                                |                                   |                                 | 2019                               |                                    |                                   |                         |                        |                        |
|         |            | Both                                | Female                            | Male                            | Both                               | Female                             | Male                              | Both                    | Female                 | Male                   |
| Jordan  | Incidence  | 296.93<br>(273.34 to 322.44)        | 375.66<br>(344.51 to 407.31)      | 221.28<br>(200.31 to 244.28)    | 494.06<br>(459.04 to 531.83)       | 544.45<br>(503.59 to 585.79)       | 448.01<br>(410.68 to 491.27)      | 66.4 (58.1 to 74.5)     | 44.9 (36.2 to 53.4)    | 102.5 (87.8 to 118.1)  |
|         | Prevalence | 8305.13<br>(7738.57 to 8832.38)     | 9870.14<br>(9190.59 to 10540.84)  | 6779<br>(6299.45 to 7254.87)    | 11379.38<br>(10691.51 to 12088.59) | 12699.49<br>(11903.15 to 13522.99) | 10219.61<br>(9555.73 to 10985.74) | 37 (32.5 to 41.7)       | 28.7 (23.4 to 34)      | 50.8 (43.8 to 58.7)    |
|         | Deaths     | 40.92<br>(34.47 to 48.38)           | 45.91 (36.02 to 57.53)            | 35.91<br>(29.44 to 43.21)       | 36.65 (30.74 to 43.21)             | 39.66 (31.45 to 48.37)             | 34.04 (27.04 to 42.68)            | -10.4 (-29.2 to 11.9)   | -13.6 (-39.2 to 15.4)  | -5.2 (-30.5 to 29.2)   |
|         | DALYs      | 899.41<br>(777.58 to 1042.36)       | 1021.92<br>(851.81 to 1234.9)     | 780.25<br>(653.25 to 932.23)    | 825.82<br>(707.85 to 957.14)       | 873.45<br>(720.84 to 1055.86)      | 782.83<br>(634.95 to 950.9)       | -8.2 (-25.3 to 11.2)    | -14.5 (-35.6 to 8.6)   | 0.3 (-22.7 to 32.2)    |
|         | YLLs       | 780.95<br>(661.23 to 912)           | 871.35<br>(693.97 to 1078.8)      | 692.67<br>(565.4 to 841.1)      | 653.07<br>(545.61 to 774.73)       | 679.58<br>(533.23 to 846.11)       | 627.89<br>(494.15 to 786.04)      | -16.4 (-34.1 to 5.4)    | -22 (-45.5 to 4)       | -9.4 (-33.6 to 24.5)   |
|         | YLDs       | 118.45<br>(86.1 to 156.32)          | 150.57<br>(109.29 to 197.9)       | 87.58<br>(62.19 to 119.08)      | 172.74<br>(125.07 to 230.74)       | 193.86<br>(140.78 to 255.54)       | 154.94<br>(108.07 to 212.06)      | 45.8 (33.3 to 59.4)     | 28.8 (15.6 to 42.7)    | 76.9 (57.8 to 100.1)   |
| Kuwait  | Incidence  | 299.9<br>(275.14 to 330.1)          | 390.91<br>(356.3 to 433.03)       | 246.79<br>(221.65 to 275.91)    | 449.98<br>(411.7 to 494.48)        | 508.26<br>(465.91 to 553.27)       | 407.72<br>(369.46 to 450.71)      | 50 (38.4 to 62.6)       | 30 (19.4 to 41.4)      | 65.2 (48.9 to 82.6)    |
|         | Prevalence | 8430.94<br>(7905.48 to 8988.16)     | 10315.05<br>(9630.93 to 11052.51) | 7177.71<br>(6660.98 to 7704.96) | 10651.88<br>(9899.15 to 11411.11)  | 12191.18<br>(11334.24 to 13047.81) | 9520.45<br>(8847.53 to 10254.27)  | 26.3 (20.1 to 33.2)     | 18.2 (11.6 to 25.1)    | 32.6 (24.6 to 41.4)    |
|         | Deaths     | 27.67<br>(23.81 to 30.52)           | 31.47 (24.18 to 36.46)            | 25.06<br>(21.94 to 28.48)       | 16.18 (13.28 to 19.5)              | 16.54 (12.54 to 21.3)              | 15.95 (12.8 to 19.61)             | -41.5 (-51.2 to -29.1)  | -47.4 (-59.2 to -27.5) | -36.4 (-48.3 to -21.4) |
|         | DALYs      | 646.93<br>(579.49 to 704.41)        | 764.3<br>(630.54 to 860.41)       | 572.98<br>(514.77 to 640.69)    | 418.09<br>(349.86 to 488.74)       | 444.11<br>(364.02 to 541.61)       | 397.17<br>(324.96 to 475.24)      | -35.4 (-44.2 to -24.8)  | -41.9 (-52 to -25.9)   | -30.7 (-41.9 to -17.8) |
|         | YLLs       | 542.12<br>(473.68 to 594.26)        | 631.81<br>(496.38 to 726.48)      | 486.99<br>(435.49 to 545.45)    | 275.73<br>(229.07 to 332.92)       | 290.26<br>(225.76 to 373.15)       | 265.38<br>(210.9 to 330.67)       | -49.1 (-57.8 to -37.7)  | -54.1 (-64.5 to -35.8) | -45.5 (-56.3 to -31.5) |
|         | YLDs       | 104.81<br>(76.23 to 139.21)         | 132.49<br>(97.47 to 172.3)        | 85.99<br>(60.79 to 116.53)      | 142.36<br>(101.83 to 190.39)       | 153.85<br>(109.47 to 203.15)       | 131.79<br>(91.62 to 180.4)        | 35.8 (21.9 to 50.5)     | 16.1 (3.4 to 30.9)     | 53.3 (33.9 to 74.9)    |

| Country | Measure    | Age-standardized rate (per 100,000) |                              |                              |                                 |                                 |                               | % Change (1990 to 2019) |                        |                       |
|---------|------------|-------------------------------------|------------------------------|------------------------------|---------------------------------|---------------------------------|-------------------------------|-------------------------|------------------------|-----------------------|
|         |            | 1990                                |                              |                              | 2019                            |                                 |                               |                         |                        |                       |
|         |            | Both                                | Female                       | Male                         | Both                            | Female                          | Male                          | Both                    | Female                 | Male                  |
| Lebanon | Incidence  | 271 (246.74 to 299.53)              | 323.69 (294.71 to 357.31)    | 218.38 (197.23 to 240.34)    | 487.66 (448.31 to 529.31)       | 519 (476.54 to 560.96)          | 451.64 (414.16 to 496.42)     | 79.9 (71.4 to 89.8)     | 60.3 (51.8 to 70.5)    | 106.8 (93.8 to 121.4) |
|         | Prevalence | 7957.24 (7432.22 to 8474.92)        | 9167.21 (8545.3 to 9816.26)  | 6668.1 (6209.66 to 7126.2)   | 11328.15 (10576.76 to 12055.5)  | 12323.77 (11550.61 to 13103.54) | 10185.04 (9485.57 to 10978.3) | 42.4 (37.8 to 47.6)     | 34.4 (29.2 to 39.7)    | 52.7 (45.9 to 60.2)   |
|         | Deaths     | 32.44 (27.01 to 39.57)              | 32.22 (25.57 to 42.66)       | 32.81 (27.28 to 39.84)       | 23.32 (16.78 to 30.26)          | 23.09 (15.76 to 27.85)          | 23.56 (14.18 to 37.71)        | -28.1 (-49.7 to -5.9)   | -28.3 (-51 to -7.3)    | -28.2 (-57.3 to 13.9) |
|         | DALYs      | 736.36 (629.66 to 867.2)            | 763.9 (628.35 to 954.61)     | 708.38 (594.86 to 846.17)    | 574.66 (449.11 to 717.08)       | 579.65 (441.31 to 689.62)       | 570.73 (404.1 to 847.63)      | -22 (-40.1 to -3.2)     | -24.1 (-43 to -6.1)    | -19.4 (-43.2 to 16.1) |
|         | YLLs       | 633.61 (532.66 to 762.52)           | 639.74 (515.46 to 818.15)    | 628.41 (520.48 to 762.47)    | 423.15 (307.18 to 555.68)       | 419.65 (287.52 to 512.82)       | 427.58 (261.2 to 693.6)       | -33.2 (-52.4 to -11.5)  | -34.4 (-54.7 to -14.3) | -32 (-57.2 to 7.1)    |
|         | YLDs       | 102.75 (74.87 to 137.29)            | 124.15 (89.75 to 163.49)     | 79.97 (56.54 to 108.26)      | 151.51 (108.62 to 200.59)       | 160 (115.21 to 210.2)           | 143.15 (99.22 to 193.05)      | 47.5 (33.8 to 61.1)     | 28.9 (15.2 to 44.4)    | 79 (58.2 to 100.6)    |
| Libya   | Incidence  | 273.41 (249.21 to 301.4)            | 328.74 (298.59 to 364.87)    | 225.25 (204.43 to 250)       | 451.25 (412.76 to 494.26)       | 497.71 (456.17 to 541.15)       | 406.76 (369.5 to 450.89)      | 65 (58.7 to 71.2)       | 51.4 (44.4 to 59.7)    | 80.6 (70.6 to 91.2)   |
|         | Prevalence | 7960.59 (7436.03 to 8527.08)        | 9302.06 (8678.89 to 9976.09) | 6805.68 (6341.74 to 7298.81) | 10798.89 (10030.29 to 11535.03) | 12121.81 (11253.66 to 12945.54) | 9546.75 (8865.35 to 10266.7)  | 35.7 (32.2 to 39.2)     | 30.3 (26.3 to 34.9)    | 40.3 (35.1 to 46)     |
|         | Deaths     | 29.75 (22.44 to 39.08)              | 31.34 (22.36 to 45.19)       | 28.43 (20.74 to 38.95)       | 30.37 (20.49 to 41.27)          | 33.35 (20.75 to 46.22)          | 27.42 (18.56 to 43.45)        | 2.1 (-25.3 to 34.9)     | 6.4 (-26.5 to 42.8)    | -3.6 (-32.5 to 40.8)  |
|         | DALYs      | 717.84 (571.93 to 880.67)           | 800.92 (617.69 to 1021.08)   | 647.4 (497.65 to 839.46)     | 755.7 (552.53 to 970.69)        | 847.51 (581.04 to 1100.49)      | 667.41 (494.61 to 970.9)      | 5.3 (-18.2 to 33.6)     | 5.8 (-21.9 to 35.6)    | 3.1 (-23.1 to 42.4)   |
|         | YLLs       | 613.06 (469.18 to 770.83)           | 670.21 (488.24 to 880.33)    | 565.1 (423.63 to 753.99)     | 599.98 (403.11 to 810.46)       | 673.28 (417.27 to 921.58)       | 529.06 (362.2 to 824.43)      | -2.1 (-29 to 31.4)      | 0.5 (-31.5 to 35.7)    | -6.4 (-35.4 to 36.8)  |
|         | YLDs       | 104.77 (76.16 to 139.11)            | 130.71 (95.11 to 173.47)     | 82.3 (58.05 to 111.01)       | 155.72 (113.5 to 207.01)        | 174.23 (125.61 to 231.29)       | 138.35 (98.33 to 188.99)      | 48.6 (36.6 to 61.5)     | 33.3 (19.1 to 47.7)    | 68.1 (50 to 88.2)     |

| Country | Measure    | Age-standardized rate (per 100,000) |                                 |                                 |                                   |                                   |                                  | % Change (1990 to 2019) |                      |                        |
|---------|------------|-------------------------------------|---------------------------------|---------------------------------|-----------------------------------|-----------------------------------|----------------------------------|-------------------------|----------------------|------------------------|
|         |            | 1990                                |                                 |                                 | 2019                              |                                   |                                  |                         |                      |                        |
|         |            | Both                                | Female                          | Male                            | Both                              | Female                            | Male                             | Both                    | Female               | Male                   |
| Morocco | Incidence  | 212.54<br>(192.23 to 234.94)        | 251.21<br>(224.98 to 280.2)     | 173.25<br>(156.53 to 191.24)    | 436.35<br>(400.91 to 477.28)      | 467.51 (427 to 514.08)            | 405.57<br>(368.35 to 445.87)     | 105.3 (97.6 to 114.1)   | 86.1 (76.3 to 96.2)  | 134.1 (122 to 148.3)   |
|         | Prevalence | 6908.18<br>(6411.46 to 7364.2)      | 7915.94<br>(7308.91 to 8487.98) | 5847.23<br>(5431.36 to 6252.48) | 10481.87<br>(9787.98 to 11222.33) | 11535.6<br>(10781.41 to 12369.5)  | 9411.19<br>(8757.7 to 10103.2)   | 51.7 (47.2 to 57)       | 45.7 (40.5 to 51.4)  | 61 (54.4 to 68.4)      |
|         | Deaths     | 29.43<br>(24.56 to 41.35)           | 27.84 (22.23 to 43.32)          | 31.67<br>(24.67 to 45.26)       | 35.84 (27.87 to 46.25)            | 36.33 (27.35 to 49.01)            | 35.42 (25.11 to 50.18)           | 21.8 (-8.9 to 51.6)     | 30.5 (-9.2 to 71.2)  | 11.9 (-18 to 48.9)     |
|         | DALYs      | 705.98<br>(615.6 to 865.71)         | 721.86<br>(603.02 to 936.44)    | 693.7<br>(567.19 to 885.43)     | 844.57<br>(673.16 to 1035.89)     | 899.73<br>(705.6 to 1101.66)      | 790.62<br>(593.63 to 1025.34)    | 19.6 (-7 to 44.6)       | 24.6 (-8.6 to 58.6)  | 14 (-12.8 to 43.6)     |
|         | YLLs       | 617.54<br>(531.48 to 776.4)         | 613.4<br>(495.98 to 828.08)     | 626.16<br>(502.72 to 816.28)    | 679.42<br>(523.68 to 859.06)      | 718.49<br>(530.49 to 906.35)      | 641.6<br>(450.53 to 874.43)      | 10 (-18 to 37.8)        | 17.1 (-20.1 to 56.5) | 2.5 (-25.8 to 34.1)    |
|         | YLDs       | 88.44<br>(63.93 to 117.39)          | 108.46<br>(78.96 to 141.38)     | 67.54<br>(47.95 to 91.12)       | 165.15<br>(119.26 to 219.06)      | 181.24<br>(131.11 to 239.64)      | 149.02<br>(104.78 to 203.66)     | 86.7 (70.9 to 102.3)    | 67.1 (49.9 to 84.7)  | 120.6 (96.7 to 148.1)  |
| Oman    | Incidence  | 226.36<br>(204.92 to 250.11)        | 268.25<br>(240.97 to 299.78)    | 191.55<br>(172.49 to 212.58)    | 442.9<br>(405.04 to 481.49)       | 480.84<br>(438.17 to 523.05)      | 416.69<br>(378.64 to 455.2)      | 95.7 (86.4 to 105.2)    | 79.3 (68.4 to 91.6)  | 117.5 (102.7 to 131.9) |
|         | Prevalence | 7111.12<br>(6611.3 to 7585.48)      | 8252.7<br>(7633.31 to 8865.3)   | 6223.03<br>(5771.89 to 6657.73) | 10466.55<br>(9764.79 to 11155.6)  | 11766.8<br>(10953.16 to 12563.18) | 9659.66<br>(9009.39 to 10336.31) | 47.2 (42.4 to 52.2)     | 42.6 (36.8 to 48.7)  | 55.2 (48.6 to 62.6)    |
|         | Deaths     | 16.82<br>(12.93 to 22.29)           | 16.19 (12.38 to 21.6)           | 18.93<br>(14.09 to 26.87)       | 19.85 (17.05 to 22.82)            | 19.4 (15.59 to 23.23)             | 21.39 (17.41 to 25.95)           | 18 (-15.1 to 58.5)      | 19.8 (-17.5 to 62.4) | 13 (-28.3 to 65.7)     |
|         | DALYs      | 413.4<br>(332.63 to 518.6)          | 443.83<br>(356.07 to 561.18)    | 402.04 (311 to 542.65)          | 491.3<br>(428.61 to 558.94)       | 533.29<br>(452.53 to 617.89)      | 471.98<br>(394.23 to 554.34)     | 18.8 (-6.6 to 46.5)     | 20.2 (-6 to 47.7)    | 17.4 (-16.3 to 56.6)   |
|         | YLLs       | 311.33<br>(240.71 to 412.95)        | 317.24<br>(239.53 to 424.75)    | 321.5<br>(236.91 to 463.26)     | 314.66<br>(271.94 to 362.03)      | 330.77<br>(269.25 to 393.85)      | 313.48<br>(256.39 to 382.85)     | 1.1 (-26.3 to 35.9)     | 4.3 (-25.9 to 42.1)  | -2.5 (-35.4 to 43.3)   |
|         | YLDs       | 102.06<br>(73.96 to 134.48)         | 126.59<br>(92.27 to 164.9)      | 80.54<br>(58.41 to 109.06)      | 176.64<br>(130.15 to 234.06)      | 202.52<br>(149.24 to 267.46)      | 158.5<br>(113.79 to 215.17)      | 73.1 (59.2 to 87.9)     | 60 (46.1 to 75)      | 96.8 (73.8 to 120.3)   |

| Country   | Measure    | Age-standardized rate (per 100,000) |                                   |                                 |                                    |                                    |                                   | % Change (1990 to 2019) |                       |                       |
|-----------|------------|-------------------------------------|-----------------------------------|---------------------------------|------------------------------------|------------------------------------|-----------------------------------|-------------------------|-----------------------|-----------------------|
|           |            | 1990                                |                                   |                                 | 2019                               |                                    |                                   |                         |                       |                       |
|           |            | Both                                | Female                            | Male                            | Both                               | Female                             | Male                              | Both                    | Female                | Male                  |
| Palestine | Incidence  | 308.03<br>(282.16 to 336.99)        | 345.41<br>(313.26 to 381.59)      | 263.36<br>(239.16 to 287.05)    | 474.96<br>(436.76 to 517.17)       | 498.95<br>(457.7 to 546.07)        | 452.51<br>(411.23 to 495.78)      | 54.2 (48.1 to 61.1)     | 44.5 (36.4 to 53.5)   | 71.8 (59.7 to 83)     |
|           | Prevalence | 8480.38<br>(7902.96 to 9037.79)     | 9488.56<br>(8790.4 to 10137.35)   | 7296.42<br>(6799.31 to 7813.66) | 11080.75<br>(10377.76 to 11858.57) | 11944.25<br>(11196.22 to 12806.11) | 10185.38<br>(9456.63 to 10934.39) | 30.7 (27 to 34.6)       | 25.9 (20.9 to 31)     | 39.6 (33 to 45.8)     |
|           | Deaths     | 46.81<br>(37.83 to 57.37)           | 43.62 (34.04 to 54.27)            | 51.65<br>(41.71 to 64.57)       | 33.58 (28.52 to 38.58)             | 30.82 (25.89 to 35.97)             | 38.74 (32.02 to 45.18)            | -28.3 (-44.8 to -8.8)   | -29.3 (-45.7 to -7.2) | -25 (-44.2 to -2.9)   |
|           | DALYs      | 1093.45<br>(884.26 to 1330.85)      | 1082.49<br>(863.87 to 1325.44)    | 1119.79<br>(892.66 to 1396.26)  | 809.92<br>(707.33 to 918.09)       | 775.59<br>(672.27 to 886.64)       | 862.71<br>(741.53 to 999.46)      | -25.9 (-40.9 to -7.8)   | -28.4 (-42.7 to -9.9) | -23 (-39.7 to -1.9)   |
|           | YLLs       | 970.46<br>(768.31 to 1204.23)       | 939.31<br>(732.57 to 1172.3)      | 1019.37<br>(797.92 to 1297.23)  | 641.43<br>(547.17 to 737.03)       | 597.68<br>(504.98 to 697.02)       | 703.58<br>(589.92 to 823.15)      | -33.9 (-48.9 to -14.5)  | -36.4 (-51 to -16.1)  | -31 (-48 to -9.1)     |
|           | YLDs       | 122.99<br>(90.23 to 161.34)         | 143.18<br>(104.53 to 188.61)      | 100.43<br>(71.91 to 132.64)     | 168.49<br>(124.52 to 224.13)       | 177.91<br>(131.68 to 232.15)       | 159.13<br>(112.71 to 219)         | 37 (26.1 to 49.1)       | 24.3 (11.7 to 37.6)   | 58.5 (41 to 78.3)     |
| Qatar     | Incidence  | 318.15<br>(287.27 to 350.25)        | 420.29<br>(378.22 to 463.63)      | 271.38<br>(243.99 to 300.87)    | 506.35<br>(463.47 to 551.97)       | 568.41<br>(521.17 to 615.44)       | 486.64<br>(443.76 to 534.31)      | 59.2 (52.2 to 66.4)     | 35.2 (27.6 to 43.2)   | 79.3 (69.6 to 89.7)   |
|           | Prevalence | 8537.86<br>(7938.22 to 9148.05)     | 10544.21<br>(9754.68 to 11373.63) | 7345.95<br>(6817.93 to 7870.31) | 11255.77<br>(10468.36 to 12087.69) | 13125.03<br>(12234.22 to 14054.66) | 10650.73<br>(9874.45 to 11466.08) | 31.8 (27.1 to 36.2)     | 24.5 (19.3 to 29.4)   | 45 (38.8 to 50.9)     |
|           | Deaths     | 48.93<br>(38.41 to 84.35)           | 55.99 (40.49 to 107.59)           | 44.24<br>(32.81 to 65.69)       | 45.88 (37.09 to 55.98)             | 71.84 (57.57 to 87.5)              | 37.72 (29.17 to 47.5)             | -6.2 (-41.8 to 28.1)    | 28.3 (-32.2 to 81.9)  | -14.7 (-41.5 to 20.2) |
|           | DALYs      | 927.8<br>(751.55 to 1439.48)        | 1133.41<br>(864.84 to 1959.99)    | 809.76<br>(625.87 to 1128.64)   | 803.55<br>(662.78 to 963.84)       | 1190.82<br>(971 to 1450.53)        | 675.84<br>(542.89 to 838.27)      | -13.4 (-40.4 to 12)     | 5.1 (-36.6 to 40.3)   | -16.5 (-38.9 to 11.6) |
|           | YLLs       | 807.02<br>(639.04 to 1312.05)       | 976.96<br>(711.85 to 1797.81)     | 710.22<br>(529.27 to 1010.35)   | 629.65<br>(503.54 to 778.06)       | 996.67<br>(791.52 to 1246.46)      | 508.15<br>(385.9 to 654.97)       | -22 (-48.8 to 5.9)      | 2 (-42.5 to 44.4)     | -28.5 (-49.9 to 1.4)  |
|           | YLDs       | 120.78<br>(87.34 to 163.55)         | 156.46<br>(114.2 to 206.57)       | 99.54<br>(70.46 to 135.96)      | 173.9<br>(124.72 to 233.62)        | 194.15<br>(141.36 to 249.46)       | 167.69<br>(115.98 to 229.32)      | 44 (28.6 to 59.7)       | 24.1 (10.5 to 38.3)   | 68.5 (49.4 to 90)     |

| Country      | Measure    | Age-standardized rate (per 100,000) |                                  |                                 |                                    |                                    |                                    | % Change (1990 to 2019) |                      |                       |
|--------------|------------|-------------------------------------|----------------------------------|---------------------------------|------------------------------------|------------------------------------|------------------------------------|-------------------------|----------------------|-----------------------|
|              |            | 1990                                |                                  |                                 | 2019                               |                                    |                                    |                         |                      |                       |
|              |            | Both                                | Female                           | Male                            | Both                               | Female                             | Male                               | Both                    | Female               | Male                  |
| Saudi Arabia | Incidence  | 307.34<br>(282.74 to 334.59)        | 376.7<br>(341.73 to 413.76)      | 259.55<br>(235.46 to 284.29)    | 561.38<br>(524.55 to 598.58)       | 606.66<br>(563.24 to 651.09)       | 531.48<br>(491.82 to 570.49)       | 82.7 (73.9 to 92.1)     | 61 (50.5 to 72.6)    | 104.8 (91.8 to 117.7) |
|              | Prevalence | 8298.56<br>(7741.28 to 8826.33)     | 9905.98<br>(9194.53 to 10582.71) | 7142.02<br>(6660.18 to 7634.98) | 12520.39<br>(11768.47 to 13282.93) | 14082.72<br>(13148.43 to 14997.17) | 11489.76<br>(10721.25 to 12224.02) | 50.9 (45.3 to 56.9)     | 42.2 (34.9 to 50.3)  | 60.9 (53.5 to 68.9)   |
|              | Deaths     | 47.9 (37.69 to 59.35)               | 43.52 (34.57 to 54.38)           | 52.44<br>(39.19 to 67.19)       | 52.88 (42.82 to 63.11)             | 53.46 (40.25 to 68.07)             | 52.74 (42.43 to 64.57)             | 10.4 (-20.8 to 50.2)    | 22.8 (-18 to 69.8)   | 0.6 (-33.1 to 47.6)   |
|              | DALYs      | 1106.77<br>(880.73 to 1366.69)      | 1095.78<br>(868.41 to 1360.26)   | 1128.82<br>(860.96 to 1447.48)  | 1197.72<br>(982.79 to 1421.32)     | 1272.11<br>(1002.17 to 1585.51)    | 1149.35<br>(931.21 to 1396.48)     | 8.2 (-20.7 to 42.6)     | 16.1 (-18.6 to 56.7) | 1.8 (-29.9 to 45.6)   |
|              | YLLs       | 988.84<br>(767.81 to 1249.49)       | 949.9<br>(739.59 to 1206.31)     | 1031.16<br>(761.99 to 1341.38)  | 1003.48<br>(798.39 to 1220.61)     | 1059.57<br>(802.41 to 1361.19)     | 967.77<br>(765.97 to 1217.04)      | 1.5 (-28.7 to 39.7)     | 11.5 (-26.3 to 58.6) | -6.1 (-38 to 41.3)    |
|              | YLDs       | 117.93<br>(85.61 to 153.76)         | 145.88<br>(106.3 to 189.79)      | 97.66<br>(70.59 to 129.1)       | 194.24<br>(140.77 to 258.26)       | 212.54<br>(157.51 to 281.64)       | 181.57<br>(126.91 to 245.8)        | 64.7 (49.7 to 81.6)     | 45.7 (29.7 to 64)    | 85.9 (64.8 to 109.2)  |
| Sudan        | Incidence  | 209.29<br>(190.01 to 230.8)         | 248.83<br>(224.35 to 277.39)     | 173.79<br>(157.86 to 191.19)    | 374.99<br>(339.59 to 413.83)       | 409.31<br>(370.43 to 448.21)       | 346.13<br>(312.41 to 384.44)       | 79.2 (72.4 to 86.1)     | 64.5 (56.2 to 72.4)  | 99.2 (88.3 to 110.5)  |
|              | Prevalence | 6814.9<br>(6333.45 to 7291.31)      | 7796.87<br>(7240.35 to 8370.27)  | 5857.18<br>(5423.36 to 6284.88) | 9400.88<br>(8723.18 to 10074.08)   | 10410.69<br>(9682.64 to 11166)     | 8463.02<br>(7826.53 to 9100.39)    | 37.9 (33.6 to 42.1)     | 33.5 (28.8 to 38.6)  | 44.5 (38.5 to 50.6)   |
|              | Deaths     | 28.53<br>(22.13 to 40.32)           | 26.84 (19.84 to 40.65)           | 30.38<br>(23.23 to 45.46)       | 28.39 (20.33 to 44.3)              | 27.37 (17.98 to 40.7)              | 29.35 (19.11 to 51.75)             | -0.5 (-33.1 to 45.8)    | 2 (-40.6 to 41.1)    | -3.4 (-35.9 to 60.7)  |
|              | DALYs      | 737.96<br>(596.02 to 942.15)        | 760.2<br>(580.18 to 1037.6)      | 717.11<br>(571.7 to 950.38)     | 717.3<br>(535.03 to 1013.09)       | 729.69<br>(534.33 to 974.25)       | 704.4<br>(494.21 to 1139.19)       | -2.8 (-31.4 to 36.2)    | -4 (-37.9 to 28.1)   | -1.8 (-30.6 to 54.7)  |
|              | YLLs       | 653.8<br>(517.32 to 856.39)         | 656.86<br>(484.79 to 927.95)     | 651.82<br>(503.96 to 882.34)    | 579.67<br>(409.08 to 865.65)       | 575.21<br>(379.31 to 812.63)       | 583.21<br>(379.8 to 1005.36)       | -11.3 (-41.1 to 32)     | -12.4 (-49 to 23.4)  | -10.5 (-40.9 to 51.7) |
|              | YLDs       | 84.17<br>(61.26 to 111.66)          | 103.34<br>(74.36 to 139.33)      | 65.29<br>(47.12 to 87.52)       | 137.64<br>(100.02 to 183.35)       | 154.48<br>(112.6 to 201.76)        | 121.19<br>(86.66 to 164.87)        | 63.5 (51.2 to 77.2)     | 49.5 (35.4 to 64.9)  | 85.6 (65.4 to 108.6)  |



| Country              | Measure    | Age-standardized rate (per 100,000) |                                 |                                 |                                   |                                    |                                  | % Change (1990 to 2019) |                       |                        |
|----------------------|------------|-------------------------------------|---------------------------------|---------------------------------|-----------------------------------|------------------------------------|----------------------------------|-------------------------|-----------------------|------------------------|
|                      |            | 1990                                |                                 |                                 | 2019                              |                                    |                                  |                         |                       |                        |
|                      |            | Both                                | Female                          | Male                            | Both                              | Female                             | Male                             | Both                    | Female                | Male                   |
| Syrian Arab Republic | Incidence  | 278.72<br>(254.79 to 307.18)        | 342.05<br>(310.94 to 378.53)    | 221.66<br>(201.2 to 244.78)     | 442.35<br>(409.46 to 480.45)      | 490.33<br>(452.33 to 533.32)       | 394.23<br>(361.51 to 434.32)     | 58.7 (49.6 to 67.1)     | 43.3 (34.4 to 52.2)   | 77.9 (62.8 to 93.3)    |
|                      | Prevalence | 8003.11<br>(7468.89 to 8515.47)     | 9365.68<br>(8714.16 to 10045.6) | 6747.59<br>(6294.58 to 7214.17) | 10470.89<br>(9813.87 to 11159.25) | 11669.82<br>(10855.49 to 12511.55) | 9275.91<br>(8649 to 9921.45)     | 30.8 (26.2 to 35.5)     | 24.6 (19.2 to 29.9)   | 37.5 (30.2 to 45.3)    |
|                      | Deaths     | 36.99<br>(30.44 to 46.13)           | 37.35 (30.21 to 47.54)          | 36.68<br>(28.93 to 48.74)       | 27.78 (22.07 to 34.58)            | 31.82 (25.08 to 39.26)             | 25.69 (19.56 to 32.74)           | -24.9 (-46.2 to 1.1)    | -14.8 (-39.5 to 14.8) | -30 (-53.6 to 0.6)     |
|                      | DALYs      | 955.07<br>(803.08 to 1143.63)       | 979.6<br>(803.09 to 1178.59)    | 931.7<br>(761.66 to 1132.95)    | 684.86<br>(556.83 to 836.76)      | 737.17<br>(600.46 to 900.72)       | 646.08<br>(511.17 to 805.61)     | -28.3 (-44.4 to -6.3)   | -24.7 (-42.3 to -1.2) | -30.7 (-49.3 to -5.1)  |
|                      | YLLs       | 837.42<br>(689.93 to 1021.58)       | 833.15<br>(668.23 to 1028.91)   | 840.81<br>(674.3 to 1046.97)    | 535.35<br>(417.39 to 690.96)      | 571.78<br>(437.11 to 743.74)       | 513.55<br>(387.2 to 666.11)      | -36.1 (-53.5 to -11.5)  | -31.4 (-51.1 to -3.7) | -38.9 (-57.9 to -11.8) |
|                      | YLDs       | 117.65<br>(85.55 to 155.17)         | 146.45<br>(107.43 to 192.16)    | 90.89<br>(65.11 to 121.49)      | 149.5<br>(108.97 to 196.71)       | 165.38<br>(120.5 to 216.32)        | 132.53 (94.4 to 177.47)          | 27.1 (16.1 to 39.9)     | 12.9 (1.3 to 26.4)    | 45.8 (28.1 to 65.3)    |
| Tunisia              | Incidence  | 257.83<br>(234.41 to 283.58)        | 305.98<br>(276.32 to 336.23)    | 213.24<br>(192.8 to 236.27)     | 452.53<br>(414.56 to 489.31)      | 487.11<br>(446.19 to 527.84)       | 417.93<br>(380.49 to 454.34)     | 75.5 (67.6 to 83.4)     | 59.2 (50.2 to 69)     | 96 (84.3 to 108.4)     |
|                      | Prevalence | 7543.05<br>(7036.1 to 8018.23)      | 8670.61<br>(8094.17 to 9235.35) | 6435.58<br>(5967.6 to 6880.76)  | 10559.96<br>(9861.45 to 11220.71) | 11568.43<br>(10751.76 to 12333.84) | 9500.46<br>(8849.57 to 10177.38) | 40 (35.9 to 44.4)       | 33.4 (28.4 to 38.8)   | 47.6 (41.7 to 54.5)    |
|                      | Deaths     | 24.28<br>(20.58 to 29.37)           | 23.46 (19.56 to 31.69)          | 25.44<br>(20.45 to 31.17)       | 23.62 (16.87 to 31.07)            | 22.93 (15.8 to 30.82)              | 24.51 (16.81 to 33.9)            | -2.7 (-31.9 to 31.3)    | -2.2 (-33.1 to 34.8)  | -3.6 (-36.6 to 37.5)   |
|                      | DALYs      | 577.18<br>(504.01 to 666.43)        | 594.25<br>(511.67 to 737.4)     | 562.49<br>(475.99 to 665.44)    | 568.57 (441 to 718.86)            | 561.59<br>(430.51 to 712.98)       | 577.24<br>(440.36 to 756.71)     | -1.5 (-25 to 25.5)      | -5.5 (-28 to 21.5)    | 2.6 (-24.8 to 37.5)    |
|                      | YLLs       | 483.01<br>(414.93 to 566.7)         | 487.13<br>(412.18 to 624.39)    | 481.25<br>(395.51 to 586.2)     | 426.12<br>(304.37 to 571.15)      | 416.54<br>(290.75 to 559.41)       | 437.3<br>(305.53 to 614.63)      | -11.8 (-38.7 to 20.6)   | -14.5 (-41.9 to 17.4) | -9.1 (-38.6 to 30.5)   |
|                      | YLDs       | 94.17<br>(68.24 to 124.38)          | 107.12<br>(77.38 to 141.62)     | 81.24<br>(58.22 to 108.34)      | 142.45<br>(103.66 to 189.24)      | 145.05<br>(106.5 to 189.87)        | 139.94<br>(99.05 to 190.64)      | 51.3 (38.7 to 65.2)     | 35.4 (21.5 to 51.1)   | 72.3 (54.5 to 92.9)    |

| Country              | Measure    | Age-standardized rate (per 100,000) |                                   |                                 |                                    |                                    |                                    | % Change (1990 to 2019) |                        |                        |
|----------------------|------------|-------------------------------------|-----------------------------------|---------------------------------|------------------------------------|------------------------------------|------------------------------------|-------------------------|------------------------|------------------------|
|                      |            | 1990                                |                                   |                                 | 2019                               |                                    |                                    |                         |                        |                        |
|                      |            | Both                                | Female                            | Male                            | Both                               | Female                             | Male                               | Both                    | Female                 | Male                   |
| Turkey               | Incidence  | 228.86<br>(212.13 to 247.99)        | 248.94<br>(230.08 to 273.35)      | 206.86<br>(191.62 to 222.78)    | 432.17<br>(396.21 to 469.84)       | 449.78<br>(411.8 to 488.13)        | 413.1 (377.7 to 456.53)            | 88.8 (75.9 to 102.3)    | 80.7 (67 to 96.1)      | 99.7 (83.9 to 118.7)   |
|                      | Prevalence | 7115.45<br>(6664.07 to 7598.65)     | 7832.68<br>(7315.65 to 8402.25)   | 6360.73<br>(5951.91 to 6779.45) | 10097.36<br>(9441.69 to 10766.51)  | 10811.69<br>(10102.45 to 11528.07) | 9355.9<br>(8690.02 to 10080.48)    | 41.9 (35.8 to 48.8)     | 38 (31.5 to 46)        | 47.1 (39.1 to 56.7)    |
|                      | Deaths     | 35.19<br>(28.26 to 50.25)           | 30.58 (24.27 to 46.45)            | 40.9 (30.66 to 60.62)           | 23.48 (18.99 to 28.71)             | 22.58 (17.98 to 27.85)             | 24.52 (19.55 to 30.12)             | -33.3 (-56.2 to -9.6)   | -26.2 (-54.3 to -0.1)  | -40 (-62.7 to -11.3)   |
|                      | DALYs      | 853.91<br>(725.99 to 1083.24)       | 778.1<br>(649.38 to 1036.9)       | 941.5<br>(750.56 to 1240.26)    | 562.02<br>(473.61 to 667.56)       | 540.16<br>(453.4 to 645.14)        | 585.97<br>(486.63 to 698.57)       | -34.2 (-51.3 to -17.5)  | -30.6 (-50.3 to -12.2) | -37.8 (-55.9 to -16.3) |
|                      | YLLs       | 758.74<br>(631.14 to 987.24)        | 672.9<br>(551.12 to 930.57)       | 856.75<br>(672.39 to 1151.1)    | 420.26<br>(341.3 to 513.64)        | 394.86<br>(316.41 to 488.27)       | 446.9<br>(357.01 to 553.39)        | -44.6 (-60.6 to -27)    | -41.3 (-60.2 to -21.8) | -47.8 (-65 to -26.7)   |
|                      | YLDs       | 95.17<br>(69.92 to 125.59)          | 105.2 (77.73 to 139.64)           | 84.75<br>(61.59 to 112.03)      | 141.76<br>(102.53 to 187.18)       | 145.3<br>(106.42 to 191.96)        | 139.07<br>(97.04 to 187.52)        | 48.9 (35.5 to 64.1)     | 38.1 (23.4 to 56.8)    | 64.1 (44 to 84.8)      |
| United Arab Emirates | Incidence  | 344.25<br>(313.56 to 375.57)        | 419.73<br>(381.71 to 461.16)      | 299.48<br>(271.65 to 328.37)    | 516.47<br>(476.76 to 558.41)       | 586.01<br>(543.59 to 630.16)       | 492.96<br>(452.28 to 535.53)       | 50 (44.1 to 56.2)       | 39.6 (33.1 to 46.2)    | 64.6 (56 to 72.8)      |
|                      | Prevalence | 8827.32<br>(8219.28 to 9454.45)     | 10597.97<br>(9810.55 to 11409.17) | 7833.23<br>(7307.88 to 8386.24) | 11504.82<br>(10751.58 to 12295.57) | 13296.62<br>(12438.69 to 14189.47) | 10816.03<br>(10062.93 to 11634.87) | 30.3 (26.6 to 34.1)     | 25.5 (21.1 to 29.8)    | 38.1 (32.4 to 43.9)    |
|                      | Deaths     | 61.23<br>(37.47 to 75.7)            | 63.31 (38.26 to 86.68)            | 59.96<br>(35.33 to 78.07)       | 48.09 (29.07 to 73.62)             | 52.13 (25.95 to 70.12)             | 46.41 (28.55 to 80.16)             | -21.5 (-46.6 to 11.6)   | -17.7 (-51.6 to 19.6)  | -22.6 (-47.6 to 21.2)  |
|                      | DALYs      | 1343.16<br>(954.68 to 1636.83)      | 1400.05<br>(959.99 to 1849.67)    | 1312.1<br>(880.12 to 1667.57)   | 1136.93<br>(787.65 to 1645.06)     | 1207.92<br>(757.01 to 1568.74)     | 1108.08<br>(756.85 to 1769.29)     | -15.4 (-40.1 to 17.9)   | -13.7 (-46.2 to 20.1)  | -15.5 (-40.1 to 26.9)  |
|                      | YLLs       | 1212.49<br>(823.9 to 1503.44)       | 1238.24<br>(801.13 to 1686.89)    | 1199.1<br>(756.64 to 1564.44)   | 952.77<br>(612.57 to 1458.93)      | 1006.82<br>(573.65 to 1378.52)     | 930.98<br>(594.53 to 1595.4)       | -21.4 (-47.3 to 14.1)   | -18.7 (-53.5 to 19.6)  | -22.4 (-48.4 to 23.6)  |
|                      | YLDs       | 130.67<br>(94.9 to 173.21)          | 161.81<br>(118.39 to 210.68)      | 113.01<br>(81.4 to 154.31)      | 184.16<br>(132.98 to 246.9)        | 201.1<br>(148.37 to 264.93)        | 177.1<br>(124.85 to 242.72)        | 40.9 (28.8 to 54.1)     | 24.3 (12.6 to 37.3)    | 56.7 (40.6 to 75.2)    |

| Country | Measure    | Age-standardized rate (per 100,000) |                                 |                                |                                 |                                |                                | % Change (1990 to 2019) |                       |                       |
|---------|------------|-------------------------------------|---------------------------------|--------------------------------|---------------------------------|--------------------------------|--------------------------------|-------------------------|-----------------------|-----------------------|
|         |            | 1990                                |                                 |                                | 2019                            |                                |                                |                         |                       |                       |
|         |            | Both                                | Female                          | Male                           | Both                            | Female                         | Male                           | Both                    | Female                | Male                  |
| Yemen   | Incidence  | 207.26<br>(188.54 to 229.36)        | 237.33<br>(213.24 to 266.38)    | 174.15<br>(157.77 to 192.85)   | 348.08<br>(311.61 to 388.8)     | 379.3 (333.6 to 440.32)        | 316.79<br>(284.97 to 355.15)   | 67.9 (58.3 to 82.2)     | 59.8 (45.5 to 83.6)   | 81.9 (71.3 to 91.9)   |
|         | Prevalence | 6688.89<br>(6206.4 to 7150.42)      | 7503.11<br>(6932.81 to 8049.71) | 5750.88<br>(5353.87 to 6160.9) | 8814.93<br>(8124.86 to 9490.76) | 9746.42<br>(8925.3 to 10754.6) | 7860.22<br>(7244.6 to 8476.38) | 31.8 (26.4 to 39.2)     | 29.9 (22.8 to 42)     | 36.7 (30.9 to 42.8)   |
|         | Deaths     | 24.8 (18.61 to 34.23)               | 22.14 (15.83 to 34.53)          | 29.64<br>(21.86 to 42.07)      | 23.19 (18.02 to 30.53)          | 20.97 (15.95 to 28.93)         | 25.74 (19.02 to 35.29)         | -6.5 (-28.5 to 22.8)    | -5.3 (-32.5 to 31.5)  | -13.2 (-34.2 to 17.4) |
|         | DALYs      | 641.24<br>(494.49 to 835.55)        | 618.94<br>(457.25 to 906.13)    | 682.65<br>(515.54 to 913.62)   | 611.56<br>(486.8 to 769.32)     | 604.25<br>(477.51 to 798.39)   | 621.25<br>(480.76 to 794.18)   | -4.6 (-26.1 to 22.9)    | -2.4 (-28.8 to 28.3)  | -9 (-30.5 to 21.9)    |
|         | YLLs       | 553.4<br>(411.93 to 747.83)         | 513.36<br>(358.1 to 793.4)      | 615.14<br>(454.21 to 841.31)   | 476.57<br>(362.33 to 632.43)    | 446.08<br>(331.55 to 628.83)   | 509.7<br>(377.44 to 686.77)    | -13.9 (-36.1 to 15.9)   | -13.1 (-38.4 to 20.8) | -17.1 (-39.1 to 15.4) |
|         | YLDs       | 87.84<br>(64.03 to 115.54)          | 105.58<br>(76.95 to 140.5)      | 67.51<br>(47.17 to 90.19)      | 134.99<br>(97.73 to 177.95)     | 158.18<br>(112.84 to 212.84)   | 111.55<br>(79.99 to 152.57)    | 53.7 (39.6 to 71)       | 49.8 (33 to 76.2)     | 65.2 (48.1 to 83.9)   |

Data in parentheses are 95% Uncertainty Intervals (95% UIs)
