# Supplementary material for: Regional burden of chronic kidney disease in North Africa and Middle East during 1990–2019; Results from Global Burden of Disease study 2019
Source: Frontiers journal article supplement (doi:10.3389/fpubh.2022.1015902), 2022-10-11
Supplement: Data_Sheet_6.PDF [file Data_Sheet_6.PDF]

| Cause                                                  | Location                     | Measure    | Age-standardized rate (per 100,000) |                      |                      |                      |                     |                      | % Change (1990 to 2019) |                       |                       |
|--------------------------------------------------------|------------------------------|------------|-------------------------------------|----------------------|----------------------|----------------------|---------------------|----------------------|-------------------------|-----------------------|-----------------------|
|                                                        |                              |            | 1990                                |                      |                      | 2019                 |                     |                      |                         |                       |                       |
|                                                        |                              |            | Both                                | Female               | Male                 | Both                 | Female              | Male                 | Both                    | Female                | Male                  |
| Chronic kidney disease due to diabetes mellitus type 1 | North Africa and Middle East | Incidence  | 1.6 (1.3 to 2)                      | 1.3 (1 to 1.7)       | 1.8 (1.5 to 2.3)     | 2.9 (2.3 to 3.5)     | 2.2 (1.8 to 2.9)    | 3.4 (2.8 to 4.2)     | 82.2 (66.6 to 98.8)     | 76.1 (58.7 to 94.6)   | 85.5 (69.1 to 103.4)  |
|                                                        |                              | Prevalence | 48 (41.1 to 56.7)                   | 47.8 (40.9 to 57.9)  | 48.2 (41.1 to 57.3)  | 79.3 (67.8 to 94.6)  | 81.4 (68.2 to 99)   | 77.6 (66.3 to 92.3)  | 65.2 (52.8 to 78.1)     | 70.2 (55.6 to 86.7)   | 61.1 (47.5 to 73.7)   |
|                                                        |                              | Deaths     | 1.1 (0.7 to 1.6)                    | 1 (0.6 to 1.4)       | 1.2 (0.7 to 1.8)     | 0.9 (0.6 to 1.4)     | 0.8 (0.5 to 1.2)    | 1 (0.6 to 1.5)       | -17 (-31.7 to 0.3)      | -15.8 (-35.4 to 2)    | -18.3 (-35.3 to 5.3)  |
|                                                        |                              | DALYs      | 39.3 (25.9 to 55.6)                 | 37.1 (24.5 to 53.1)  | 41.5 (27 to 59.7)    | 34 (22.3 to 49.5)    | 32 (20.8 to 46.8)   | 35.9 (23.2 to 53.4)  | -13.5 (-27 to 2.3)      | -13.8 (-31 to 3.5)    | -13.3 (-28.4 to 8.2)  |
|                                                        |                              | YLLs       | 37 (23.8 to 53.2)                   | 35 (22.7 to 50.6)    | 38.9 (24.9 to 56.9)  | 30 (18.9 to 45.1)    | 28.4 (17.5 to 42.3) | 31.6 (19.4 to 48.8)  | -18.8 (-32.3 to -2)     | -18.9 (-37 to -1.3)   | -18.8 (-34.4 to 4)    |
|                                                        |                              | YLDs       | 2.3 (1.6 to 3.2)                    | 2.1 (1.5 to 3)       | 2.5 (1.7 to 3.5)     | 4 (2.6 to 5.6)       | 3.6 (2.4 to 5.1)    | 4.3 (2.8 to 6)       | 69.5 (53.3 to 86.8)     | 68.8 (49.8 to 89.9)   | 70.1 (53.5 to 88.5)   |
|                                                        | Afghanistan                  | Incidence  | 1.3 (0.6 to 2.5)                    | 1.1 (0.4 to 2.6)     | 1.4 (0.7 to 2.7)     | 2 (0.9 to 3.9)       | 1.7 (0.6 to 3.9)    | 2.3 (1.1 to 4.4)     | 58.1 (46.4 to 73.5)     | 49.4 (37.9 to 64.5)   | 63.2 (47.3 to 84.2)   |
|                                                        |                              | Prevalence | 34.6 (22.4 to 51.8)                 | 33.7 (20.2 to 53.5)  | 35.7 (22.3 to 54.6)  | 51.4 (32.5 to 79.7)  | 50 (28.6 to 82.4)   | 53.1 (32.6 to 83.2)  | 48.7 (33.2 to 64.6)     | 48.4 (32.1 to 66.2)   | 48.8 (29.6 to 69.1)   |
|                                                        |                              | Deaths     | 2.3 (1.4 to 3.7)                    | 2.3 (1.4 to 3.9)     | 2.2 (1.2 to 3.6)     | 1.9 (1.1 to 3.1)     | 2 (1.1 to 3.5)      | 1.8 (1 to 2.9)       | -17.9 (-42.7 to 12.6)   | -15.2 (-47.5 to 24.4) | -16.8 (-42.9 to 16.9) |
|                                                        |                              | DALYs      | 86.8 (51.3 to 138.4)                | 94.2 (53.4 to 158.5) | 75.8 (42.8 to 120.7) | 70.9 (43.1 to 116.2) | 78.5 (45 to 139.4)  | 64.3 (36.2 to 104.2) | -18.3 (-43.2 to 14.9)   | -16.7 (-47.8 to 24.4) | -15.2 (-41.8 to 23.9) |
|                                                        |                              | YLLs       | 84.9 (49.7 to 136.7)                | 92.4 (51.8 to 157.1) | 73.8 (41.7 to 118.6) | 68.1 (40.5 to 112.6) | 75.8 (42 to 136.8)  | 61.3 (34.1 to 100.7) | -19.8 (-45 to 14.1)     | -18 (-49.4 to 23.1)   | -17 (-44.1 to 22.6)   |
|                                                        |                              | YLDs       | 1.9 (1.1 to 3.1)                    | 1.8 (1 to 3.1)       | 2 (1.2 to 3.1)       | 2.8 (1.6 to 4.8)     | 2.6 (1.4 to 5)      | 3 (1.7 to 5)         | 49.9 (29.4 to 69.1)     | 49.3 (24.6 to 71.3)   | 51.5 (28.7 to 74.2)   |

| Cause | Location | Measure    | Age-standardized rate (per 100,000) |                     |                     |                      |                      |                     | % Change (1990 to 2019) |                       |                       |
|-------|----------|------------|-------------------------------------|---------------------|---------------------|----------------------|----------------------|---------------------|-------------------------|-----------------------|-----------------------|
|       |          |            | 1990                                |                     |                     | 2019                 |                      |                     |                         |                       |                       |
|       |          |            | Both                                | Female              | Male                | Both                 | Female               | Male                | Both                    | Female                | Male                  |
|       | Algeria  | Incidence  | 1.4 (0.6 to 3)                      | 1.2 (0.5 to 2.9)    | 1.5 (0.7 to 3.1)    | 2.6 (1.3 to 5.1)     | 2.1 (0.9 to 4.7)     | 3 (1.5 to 5.7)      | 87 (66.5 to 123.8)      | 73.6 (56.2 to 100.3)  | 96.9 (70.3 to 142.1)  |
|       |          | Prevalence | 39.7 (25.2 to 65.4)                 | 41.1 (24.4 to 67.7) | 38.4 (22.6 to 64.5) | 70.5 (45.3 to 112.2) | 72.1 (43.5 to 117.9) | 68.9 (42 to 114)    | 77.6 (62.8 to 94.1)     | 75.4 (57.5 to 95)     | 79.5 (61.4 to 100.5)  |
|       |          | Deaths     | 1.1 (0.6 to 1.8)                    | 1.1 (0.6 to 2.1)    | 1 (0.6 to 1.7)      | 0.8 (0.5 to 1.2)     | 0.9 (0.5 to 1.4)     | 0.7 (0.4 to 1.2)    | -27 (-47.3 to 0.1)      | -23.9 (-47 to 8.6)    | -30.5 (-52.9 to 1.3)  |
|       |          | DALYs      | 39.3 (23.6 to 64.2)                 | 42.9 (24.5 to 78)   | 35.9 (21.8 to 55.6) | 29.9 (19 to 45.4)    | 32.9 (20.3 to 52.1)  | 26.9 (16.7 to 42.5) | -24 (-45.1 to 4.8)      | -23.4 (-47.4 to 9.2)  | -25 (-49.3 to 8)      |
|       |          | YLLs       | 37.6 (22.2 to 62.4)                 | 41.2 (23 to 76)     | 34.1 (20 to 53)     | 26.6 (15.9 to 41.7)  | 29.8 (17.2 to 48.2)  | 23.4 (13.4 to 38.4) | -29.3 (-50.1 to -0.8)   | -27.8 (-50.7 to 5)    | -31.4 (-54.6 to 2.4)  |
|       |          | YLDs       | 1.8 (1 to 2.8)                      | 1.7 (1 to 2.9)      | 1.8 (1.1 to 3.1)    | 3.3 (2 to 5.5)       | 3.1 (1.7 to 5.5)     | 3.6 (2 to 5.9)      | 90.2 (65.1 to 115.6)    | 83.6 (53.7 to 114.4)  | 95 (65.9 to 124.2)    |
|       | Bahrain  | Incidence  | 1.2 (0.5 to 2.4)                    | 1 (0.4 to 2.4)      | 1.3 (0.6 to 2.6)    | 2.3 (1.1 to 4.3)     | 1.8 (0.7 to 4.1)     | 2.6 (1.2 to 4.9)    | 92.6 (71.9 to 130.1)    | 74.8 (57.5 to 98.8)   | 99.6 (76.8 to 139.6)  |
|       |          | Prevalence | 36.3 (23.5 to 57.8)                 | 38.8 (23.5 to 65.6) | 34.9 (21.4 to 55.4) | 60.5 (39.1 to 96.9)  | 64.1 (39.3 to 107.8) | 58.4 (35.8 to 94.3) | 66.5 (51.6 to 83.5)     | 65.2 (49 to 83.6)     | 67.3 (47.9 to 89)     |
|       |          | Deaths     | 0.9 (0.5 to 1.4)                    | 0.9 (0.5 to 1.4)    | 0.9 (0.6 to 1.6)    | 0.7 (0.4 to 1.1)     | 0.6 (0.4 to 1)       | 0.8 (0.5 to 1.2)    | -21.3 (-40.4 to 1.8)    | -26.6 (-47.7 to 1.3)  | -19.3 (-39.4 to 7.7)  |
|       |          | DALYs      | 27.6 (17.3 to 41.9)                 | 27.5 (16.9 to 42.5) | 28.1 (17.3 to 45.7) | 22.8 (15 to 33.6)    | 20.7 (13.5 to 30.5)  | 24.1 (15.7 to 36.2) | -17.6 (-36.3 to 5.8)    | -24.7 (-45.7 to 2)    | -13.9 (-35.2 to 13.6) |
|       |          | YLLs       | 25.7 (15.7 to 39.9)                 | 25.6 (15.1 to 40.4) | 26 (15.5 to 43.5)   | 19.5 (12.3 to 29.8)  | 17.7 (10.7 to 27.4)  | 20.7 (12.9 to 32.5) | -24.1 (-42.7 to -1.5)   | -30.9 (-50.9 to -3.7) | -20.5 (-42 to 7.8)    |
|       |          | YLDs       | 2 (1.2 to 3.1)                      | 1.9 (1.1 to 3.1)    | 2 (1.2 to 3.2)      | 3.3 (1.9 to 5.3)     | 3 (1.7 to 5.2)       | 3.4 (2 to 5.7)      | 67.3 (42.9 to 93.4)     | 60.2 (31.9 to 92.2)   | 70.1 (43.6 to 99.1)   |

| Cause | Location                   | Measure    | Age-standardized rate (per 100,000) |                     |                     |                      |                      |                      | % Change (1990 to 2019) |                        |                        |
|-------|----------------------------|------------|-------------------------------------|---------------------|---------------------|----------------------|----------------------|----------------------|-------------------------|------------------------|------------------------|
|       |                            |            | 1990                                |                     |                     | 2019                 |                      |                      |                         |                        |                        |
|       |                            |            | Both                                | Female              | Male                | Both                 | Female               | Male                 | Both                    | Female                 | Male                   |
|       | Egypt                      | Incidence  | 1.9 (1.1 to 3.3)                    | 1.5 (0.7 to 3)      | 2.2 (1.3 to 3.8)    | 3 (1.7 to 5.3)       | 2.4 (1.1 to 4.7)     | 3.5 (2 to 6.3)       | 59.5 (44.3 to 75)       | 60 (43.4 to 78.8)      | 56.6 (37.8 to 75.3)    |
|       |                            | Prevalence | 59.3 (41.5 to 84.6)                 | 58.2 (37.8 to 88.3) | 60.5 (41 to 88.9)   | 82.8 (56.5 to 123.1) | 87.7 (55.1 to 134.9) | 77.5 (50.8 to 120.7) | 39.7 (22.3 to 58)       | 50.7 (32.1 to 71.5)    | 28.2 (8.5 to 50.4)     |
|       |                            | Deaths     | 1.1 (0.6 to 1.7)                    | 1.1 (0.5 to 1.8)    | 1.1 (0.6 to 1.7)    | 1.2 (0.6 to 2.1)     | 1.2 (0.5 to 2.3)     | 1.2 (0.6 to 2.3)     | 12.7 (-22.7 to 51.7)    | 12.7 (-27.4 to 55.5)   | 14.3 (-27.1 to 62.1)   |
|       |                            | DALYs      | 38.4 (23.6 to 57.6)                 | 39.9 (20.3 to 61.9) | 37 (22.4 to 58.3)   | 42.8 (23 to 72.6)    | 42.5 (18.7 to 73.7)  | 43.1 (23.3 to 77.5)  | 11.4 (-20.2 to 48.2)    | 6.6 (-27.5 to 46)      | 16.6 (-21.6 to 60.3)   |
|       |                            | YLLs       | 35.4 (20.9 to 54)                   | 37.2 (17.8 to 59.3) | 33.7 (19.3 to 54.2) | 38.2 (18.9 to 67.5)  | 38.3 (14.7 to 69.6)  | 38.2 (19 to 72.4)    | 7.8 (-26.1 to 47)       | 2.9 (-34.8 to 45)      | 13.6 (-29.2 to 60.5)   |
|       |                            | YLDs       | 3 (1.8 to 4.7)                      | 2.7 (1.6 to 4.4)    | 3.3 (1.9 to 5.1)    | 4.6 (2.7 to 7.4)     | 4.3 (2.4 to 7.1)     | 4.9 (2.8 to 7.9)     | 53.2 (33.6 to 74.5)     | 56.8 (32.7 to 84.1)    | 48.2 (27.4 to 70)      |
|       | Iran (Islamic Republic of) | Incidence  | 2.1 (1.7 to 2.6)                    | 1.7 (1.3 to 2.2)    | 2.5 (2.1 to 3.1)    | 3.2 (2.6 to 3.8)     | 2.5 (2 to 3.2)       | 3.9 (3.1 to 4.7)     | 49.7 (39.9 to 61.3)     | 47.7 (37.1 to 60)      | 52.1 (41.4 to 64.1)    |
|       |                            | Prevalence | 61.3 (53.2 to 71.4)                 | 59.7 (51.8 to 69.9) | 62.6 (53.9 to 73.4) | 94.2 (80.9 to 110.8) | 96.1 (81 to 114.7)   | 92.4 (78.6 to 109.8) | 53.7 (42.3 to 65.9)     | 60.9 (48.4 to 76.5)    | 47.5 (36.7 to 58.2)    |
|       |                            | Deaths     | 0.7 (0.5 to 1.1)                    | 0.6 (0.4 to 0.9)    | 0.8 (0.5 to 1.2)    | 0.5 (0.4 to 0.8)     | 0.4 (0.3 to 0.6)     | 0.6 (0.4 to 0.9)     | -26.6 (-34.2 to -18.4)  | -27.1 (-38.7 to -16.4) | -25.4 (-35.1 to -12.9) |
|       |                            | DALYs      | 26.7 (18.2 to 37.4)                 | 23 (15.9 to 32.2)   | 30 (20 to 42.9)     | 20.8 (14.7 to 27.8)  | 17.4 (12.5 to 23.1)  | 24.1 (16.6 to 32.9)  | -22.2 (-29.5 to -13.2)  | -24.4 (-33.3 to -13.9) | -19.7 (-29.2 to -7.5)  |
|       |                            | YLLs       | 24.3 (16 to 34.7)                   | 20.9 (13.8 to 29.6) | 27.4 (17.5 to 39.8) | 17.4 (11.7 to 24.2)  | 14.4 (9.7 to 19.9)   | 20.3 (13.3 to 28.8)  | -28.4 (-35.4 to -20.2)  | -30.9 (-39.6 to -20.3) | -25.7 (-34.9 to -13.5) |
|       |                            | YLDs       | 2.4 (1.6 to 3.3)                    | 2.2 (1.5 to 3)      | 2.7 (1.8 to 3.7)    | 3.4 (2.2 to 4.8)     | 3 (2 to 4.3)         | 3.8 (2.5 to 5.3)     | 40.2 (27 to 54)         | 39.3 (23.5 to 57.4)    | 42.3 (29.2 to 55.2)    |

| Cause | Location | Measure    | Age-standardized rate (per 100,000) |                      |                     |                      |                      |                      | % Change (1990 to 2019) |                       |                       |
|-------|----------|------------|-------------------------------------|----------------------|---------------------|----------------------|----------------------|----------------------|-------------------------|-----------------------|-----------------------|
|       |          |            | 1990                                |                      |                     | 2019                 |                      |                      |                         |                       |                       |
|       |          |            | Both                                | Female               | Male                | Both                 | Female               | Male                 | Both                    | Female                | Male                  |
|       | Iraq     | Incidence  | 1.5 (0.7 to 3.3)                    | 1.3 (0.5 to 3.3)     | 1.7 (0.8 to 3.5)    | 2.8 (1.5 to 5.6)     | 2.2 (0.9 to 5.2)     | 3.4 (1.7 to 6.3)     | 83.1 (61.2 to 122.1)    | 66.7 (47.6 to 100.8)  | 95.2 (69.3 to 138.1)  |
|       |          | Prevalence | 38.4 (24.3 to 63.2)                 | 37.3 (21.9 to 64.1)  | 39.6 (23.9 to 68.1) | 70 (45.3 to 112.4)   | 67.6 (41.1 to 116)   | 72.5 (44.6 to 119.5) | 82 (65 to 102.5)        | 81 (61.9 to 105)      | 83.4 (64.5 to 106.2)  |
|       |          | Deaths     | 1.7 (1.1 to 2.6)                    | 1.6 (0.9 to 2.7)     | 1.8 (1.1 to 2.9)    | 1.3 (0.8 to 2.2)     | 1.1 (0.6 to 1.8)     | 1.6 (0.9 to 2.6)     | -21 (-43.3 to 7.2)      | -30.9 (-54.6 to 4.4)  | -12.1 (-39 to 22.2)   |
|       |          | DALYs      | 61.5 (38.3 to 94.4)                 | 59.8 (34.3 to 100.9) | 63.4 (37.6 to 99.2) | 48.3 (28.6 to 76.8)  | 41.5 (23.6 to 67.1)  | 55.2 (32 to 91.2)    | -21.4 (-43.2 to 9.1)    | -30.5 (-53.8 to 4.5)  | -12.9 (-39.5 to 23.2) |
|       |          | YLLs       | 59.3 (36.3 to 92.5)                 | 57.8 (32.7 to 98.9)  | 61.1 (35.7 to 97)   | 44.4 (25.3 to 73.1)  | 38.2 (20.6 to 63.8)  | 50.8 (28.3 to 85.3)  | -25.1 (-48.1 to 5.7)    | -34 (-58.2 to 2.5)    | -16.8 (-43.6 to 19.2) |
|       |          | YLDs       | 2.2 (1.3 to 3.6)                    | 1.9 (1.1 to 3.4)     | 2.4 (1.4 to 3.9)    | 3.9 (2.3 to 6.5)     | 3.4 (1.9 to 6)       | 4.5 (2.6 to 7.4)     | 81.9 (57.2 to 108.4)    | 73.5 (42 to 106.1)    | 89 (59.6 to 117.4)    |
|       | Jordan   | Incidence  | 1.3 (0.5 to 3)                      | 1.2 (0.4 to 3)       | 1.4 (0.5 to 3)      | 2.6 (1.3 to 5.2)     | 2.3 (0.9 to 5.1)     | 2.8 (1.3 to 5.6)     | 98.1 (71.6 to 155.8)    | 89.3 (61.8 to 143.8)  | 104.4 (74.4 to 170)   |
|       |          | Prevalence | 36.8 (22.6 to 62.8)                 | 39.7 (23.5 to 68.1)  | 34.3 (19.3 to 61.3) | 67.5 (44.5 to 109.7) | 76.4 (46.9 to 128.5) | 60.5 (36.9 to 103.4) | 83.4 (63.9 to 108.7)    | 92.5 (66.8 to 126.3)  | 76.3 (55.8 to 103.5)  |
|       |          | Deaths     | 1.3 (0.8 to 1.9)                    | 1.3 (0.8 to 1.9)     | 1.3 (0.8 to 1.9)    | 1 (0.6 to 1.5)       | 0.9 (0.5 to 1.4)     | 1.1 (0.7 to 1.7)     | -20.1 (-38.1 to 3.3)    | -30.1 (-52.9 to -1.1) | -11.7 (-36.9 to 22.8) |
|       |          | DALYs      | 43.8 (28.1 to 64)                   | 43.8 (27.5 to 65.4)  | 43.8 (27.3 to 65)   | 35.5 (23.1 to 51.3)  | 30.9 (19.9 to 46)    | 39.4 (24.5 to 58.4)  | -18.8 (-36.4 to 4.5)    | -29.4 (-51.1 to -0.4) | -10 (-35.6 to 24.3)   |
|       |          | YLLs       | 41.8 (26.6 to 61.9)                 | 41.8 (25.6 to 63.4)  | 41.9 (25.9 to 62.9) | 32 (20.3 to 47.7)    | 27.2 (16.7 to 43)    | 36.1 (21.9 to 54.5)  | -23.4 (-41.1 to 0.3)    | -34.8 (-55.9 to -6.4) | -13.9 (-39.3 to 21)   |
|       |          | YLDs       | 1.9 (1.2 to 3.3)                    | 2 (1.1 to 3.5)       | 1.9 (1.1 to 3.2)    | 3.5 (2 to 6)         | 3.6 (1.9 to 6.4)     | 3.4 (1.9 to 5.8)     | 80 (53.2 to 111.7)      | 85.4 (48.3 to 128.2)  | 76 (46.8 to 111.1)    |

| Cause | Location | Measure    | Age-standardized rate (per 100,000) |                     |                     |                      |                      |                      | % Change (1990 to 2019) |                        |                        |
|-------|----------|------------|-------------------------------------|---------------------|---------------------|----------------------|----------------------|----------------------|-------------------------|------------------------|------------------------|
|       |          |            | 1990                                |                     |                     | 2019                 |                      |                      |                         |                        |                        |
|       |          |            | Both                                | Female              | Male                | Both                 | Female               | Male                 | Both                    | Female                 | Male                   |
|       | Kuwait   | Incidence  | 1.7 (0.9 to 3.4)                    | 1.5 (0.7 to 3.4)    | 1.9 (1 to 3.5)      | 2.8 (1.6 to 5.1)     | 2.3 (1.1 to 5)       | 3.1 (1.8 to 5.6)     | 57.6 (39 to 90.5)       | 48.6 (31.8 to 77.4)    | 67 (43.1 to 105.5)     |
|       |          | Prevalence | 49.1 (32.7 to 74.6)                 | 52.9 (32.4 to 85.8) | 46.3 (29.9 to 70.8) | 72.5 (50.5 to 109.1) | 76.9 (48.8 to 118.8) | 67.8 (45.1 to 104.6) | 47.8 (29.9 to 70.7)     | 45.4 (27.1 to 68.9)    | 46.5 (25.8 to 71.8)    |
|       |          | Deaths     | 0.8 (0.5 to 1.2)                    | 0.9 (0.5 to 1.3)    | 0.8 (0.5 to 1.2)    | 0.4 (0.2 to 0.6)     | 0.3 (0.2 to 0.6)     | 0.4 (0.2 to 0.6)     | -54 (-62.9 to -42.9)    | -59.2 (-69.4 to -43.8) | -50.6 (-61.9 to -36.5) |
|       |          | DALYs      | 28.7 (18.7 to 40.8)                 | 30.7 (20 to 44.6)   | 27.5 (17.5 to 39.7) | 14.7 (10 to 20.8)    | 13.9 (9.1 to 20.7)   | 15.1 (10 to 21.6)    | -48.9 (-58.2 to -37.2)  | -54.6 (-65.4 to -39.9) | -45.1 (-56.6 to -30.4) |
|       |          | YLLs       | 26.4 (16.8 to 38.8)                 | 28.5 (17.9 to 42.6) | 25.2 (15.8 to 37.6) | 11.2 (6.8 to 16.9)   | 10.7 (6.3 to 17)     | 11.5 (7 to 17.7)     | -57.7 (-65.9 to -47.5)  | -62.5 (-72.1 to -48.7) | -54.5 (-65.1 to -41.1) |
|       |          | YLDs       | 2.2 (1.3 to 3.4)                    | 2.2 (1.2 to 3.6)    | 2.2 (1.3 to 3.6)    | 3.5 (2 to 5.3)       | 3.2 (1.8 to 5.6)     | 3.6 (2 to 5.8)       | 55.4 (33.7 to 84.3)     | 49.1 (24.3 to 78.5)    | 60.4 (36.3 to 92.4)    |
|       | Lebanon  | Incidence  | 1.4 (0.7 to 2.7)                    | 1.2 (0.5 to 2.8)    | 1.6 (0.7 to 3.1)    | 2.7 (1.4 to 4.9)     | 2.2 (0.9 to 4.8)     | 3.2 (1.6 to 5.7)     | 93.3 (72.4 to 126.8)    | 84 (64 to 119.2)       | 104.2 (77 to 143.9)    |
|       |          | Prevalence | 42 (28.1 to 64.9)                   | 43.7 (27.4 to 71.2) | 40.2 (24.8 to 63.9) | 73.6 (48.9 to 114.2) | 77.6 (48.1 to 124.8) | 70 (44.4 to 111.9)   | 75.4 (60.1 to 91.4)     | 77.8 (60.2 to 98.2)    | 74.3 (54.7 to 95.2)    |
|       |          | Deaths     | 1 (0.6 to 1.5)                      | 0.9 (0.6 to 1.4)    | 1 (0.6 to 1.6)      | 0.6 (0.3 to 1)       | 0.5 (0.3 to 0.8)     | 0.7 (0.4 to 1.2)     | -38.9 (-57.4 to -16.7)  | -40.4 (-61 to -16.4)   | -36.3 (-60.4 to -2.9)  |
|       |          | DALYs      | 34.7 (22 to 52.7)                   | 33.8 (20.8 to 52.1) | 35.5 (22.1 to 56.2) | 22.8 (14.2 to 35)    | 21.5 (13.3 to 32.1)  | 24.5 (14.2 to 41.9)  | -34.4 (-52.6 to -12.4)  | -36.3 (-57.5 to -10)   | -31.2 (-53.2 to 0.7)   |
|       |          | YLLs       | 32.8 (20.4 to 50.6)                 | 31.9 (19.2 to 50.2) | 33.5 (20.4 to 54.1) | 19.4 (11.4 to 31.8)  | 18.3 (10.2 to 28.6)  | 20.8 (11.4 to 38.3)  | -40.9 (-59.4 to -18.5)  | -42.7 (-63.7 to -16)   | -38 (-60.3 to -4.9)    |
|       |          | YLDs       | 1.9 (1.1 to 3.3)                    | 1.8 (1 to 3.3)      | 2 (1.2 to 3.4)      | 3.4 (2 to 6.2)       | 3.2 (1.7 to 6.1)     | 3.6 (2 to 6.4)       | 78 (53.4 to 103.2)      | 74.8 (41.9 to 106.6)   | 84 (58.2 to 113.6)     |

| Cause   | Location   | Measure             | Age-standardized rate (per 100,000) |                     |                      |                      |                      |                       | % Change (1990 to 2019) |                       |      |
|---------|------------|---------------------|-------------------------------------|---------------------|----------------------|----------------------|----------------------|-----------------------|-------------------------|-----------------------|------|
|         |            |                     | 1990                                |                     |                      | 2019                 |                      |                       |                         |                       |      |
|         |            |                     | Both                                | Female              | Male                 | Both                 | Female               | Male                  | Both                    | Female                | Male |
| Libya   | Incidence  | 1.4 (0.7 to 2.9)    | 1.3 (0.5 to 2.9)                    | 1.5 (0.7 to 3.2)    | 2.7 (1.5 to 5.1)     | 2.2 (1 to 4.9)       | 3.1 (1.6 to 5.9)     | 90.2 (67.7 to 125.4)  | 79.4 (58.4 to 109.3)    | 100.8 (71.6 to 148)   |      |
|         | Prevalence | 40.7 (26.4 to 65.9) | 43.6 (27.5 to 74.2)                 | 38.3 (23.3 to 65.4) | 73.5 (49.8 to 118.2) | 78 (49.6 to 131.4)   | 69.5 (43.9 to 119.3) | 80.8 (62.6 to 100.6)  | 78.8 (58.8 to 99.9)     | 81.3 (60.5 to 108)    |      |
|         | Deaths     | 0.9 (0.6 to 1.5)    | 1 (0.6 to 1.5)                      | 0.9 (0.5 to 1.5)    | 0.9 (0.5 to 1.6)     | 1 (0.5 to 1.6)       | 0.9 (0.5 to 1.7)     | 0.3 (-29.6 to 41.6)   | 1.3 (-32.3 to 42.7)     | -1.6 (-35.2 to 48)    |      |
|         | DALYs      | 34 (21.1 to 51.7)   | 36.2 (21.7 to 55.6)                 | 32.4 (19 to 51.7)   | 35.5 (20.6 to 56.7)  | 37.5 (20.7 to 59.5)  | 33.8 (19.3 to 58.1)  | 4.4 (-26 to 45.9)     | 3.4 (-29.4 to 44.8)     | 4.1 (-29.1 to 52.3)   |      |
|         | YLLs       | 32.1 (19.4 to 49.7) | 34.3 (19.7 to 53.9)                 | 30.5 (17.4 to 49.5) | 31.9 (17.9 to 52.8)  | 34 (17.7 to 56.1)    | 30 (15.8 to 54.7)    | -0.6 (-31.6 to 42.1)  | -0.8 (-34.5 to 42.9)    | -1.7 (-35.7 to 49.6)  |      |
|         | YLDs       | 1.9 (1.2 to 3.3)    | 1.9 (1.1 to 3.2)                    | 2 (1.1 to 3.3)      | 3.6 (2.1 to 6.2)     | 3.4 (1.8 to 6.1)     | 3.8 (2.2 to 6.6)     | 86.1 (61.5 to 111)    | 78.3 (45 to 108.5)      | 94 (66.4 to 125.8)    |      |
| Morocco | Incidence  | 1.2 (0.6 to 2.5)    | 1.1 (0.4 to 2.3)                    | 1.4 (0.7 to 2.7)    | 2.6 (1.3 to 5.1)     | 2.1 (0.9 to 4.6)     | 3.2 (1.6 to 6)       | 115.6 (98 to 141.1)   | 100.2 (83.1 to 125.1)   | 126.6 (103.6 to 159)  |      |
|         | Prevalence | 40.6 (27.1 to 60.3) | 42.3 (26.7 to 65)                   | 38.7 (24.9 to 62.7) | 71.8 (45.9 to 109.5) | 72.5 (43.6 to 115.1) | 71 (44.8 to 117.5)   | 76.9 (54.8 to 99.3)   | 71.1 (48.6 to 97.2)     | 83.3 (55.8 to 110.7)  |      |
|         | Deaths     | 0.9 (0.5 to 1.3)    | 0.8 (0.4 to 1.2)                    | 0.9 (0.6 to 1.5)    | 0.9 (0.5 to 1.5)     | 0.9 (0.5 to 1.6)     | 0.9 (0.5 to 1.6)     | 10.7 (-21.9 to 47.4)  | 22.8 (-20.9 to 77.4)    | 0.6 (-30.8 to 37.9)   |      |
|         | DALYs      | 30.8 (19.4 to 45.8) | 29.1 (17.2 to 44.3)                 | 32.5 (19.5 to 49.9) | 34.3 (20.4 to 53.9)  | 35.9 (20.8 to 57.1)  | 32.7 (18.8 to 52.8)  | 11.5 (-20.4 to 48)    | 23.5 (-19.8 to 78.7)    | 0.5 (-28.4 to 38.5)   |      |
|         | YLLs       | 29 (17.8 to 44)     | 27.4 (15.8 to 42.6)                 | 30.7 (17.8 to 47.7) | 30.7 (17.2 to 50.5)  | 32.6 (18.1 to 54.3)  | 28.8 (15 to 48.9)    | 5.7 (-27.3 to 44.2)   | 18.9 (-25.4 to 77.4)    | -6.4 (-35.4 to 32.6)  |      |
|         | YLDs       | 1.7 (1 to 2.8)      | 1.7 (0.9 to 3)                      | 1.8 (1.1 to 2.9)    | 3.6 (2 to 6.2)       | 3.3 (1.6 to 6.3)     | 3.9 (2.3 to 6.7)     | 107.9 (80.8 to 136.9) | 99.4 (66.9 to 134.8)    | 115.2 (82.2 to 150.7) |      |

| Cause | Location  | Measure    | Age-standardized rate (per 100,000) |                     |                     |                      |                      |                      | % Change (1990 to 2019) |                        |                       |
|-------|-----------|------------|-------------------------------------|---------------------|---------------------|----------------------|----------------------|----------------------|-------------------------|------------------------|-----------------------|
|       |           |            | 1990                                |                     |                     | 2019                 |                      |                      |                         |                        |                       |
|       |           |            | Both                                | Female              | Male                | Both                 | Female               | Male                 | Both                    | Female                 | Male                  |
|       | Oman      | Incidence  | 1.1 (0.6 to 2.2)                    | 0.9 (0.4 to 2)      | 1.3 (0.6 to 2.4)    | 2.6 (1.5 to 4.6)     | 2 (0.9 to 4.1)       | 3 (1.7 to 5.2)       | 131.4 (100.2 to 185.1)  | 119 (88.2 to 171)      | 136.5 (99.8 to 192.1) |
|       |           | Prevalence | 37.9 (25.2 to 57.8)                 | 38.9 (24 to 61.1)   | 37.3 (23.5 to 59.9) | 73.5 (50.3 to 110.1) | 80.5 (50.5 to 123.6) | 71.5 (45.9 to 110.9) | 94 (75.7 to 117.2)      | 106.7 (85.6 to 133.2)  | 91.5 (67.6 to 120.1)  |
|       |           | Deaths     | 0.4 (0.2 to 0.7)                    | 0.4 (0.2 to 0.7)    | 0.5 (0.3 to 0.8)    | 0.4 (0.2 to 0.6)     | 0.4 (0.3 to 0.6)     | 0.4 (0.3 to 0.7)     | -8.1 (-35.6 to 29.5)    | -3.9 (-34.2 to 37.4)   | -11.2 (-43.1 to 32.9) |
|       |           | DALYs      | 15.2 (9.2 to 24.1)                  | 15.5 (9.4 to 24.2)  | 15.6 (9.2 to 25.8)  | 14.8 (10 to 21.3)    | 15.6 (10.7 to 22.1)  | 14.9 (9.6 to 22.5)   | -2.5 (-28.9 to 31.4)    | 0.9 (-29.1 to 40.8)    | -4.4 (-34.9 to 36.4)  |
|       |           | YLLs       | 13.2 (7.5 to 21.9)                  | 13.6 (7.7 to 22.3)  | 13.4 (7.4 to 23.7)  | 10.8 (6.6 to 16.9)   | 11.9 (7.6 to 17.6)   | 10.6 (6.3 to 18)     | -18.3 (-43.4 to 16.7)   | -12.8 (-40.4 to 27.4)  | -21.3 (-49.6 to 19.2) |
|       |           | YLDs       | 2.1 (1.3 to 3.2)                    | 1.9 (1.1 to 3)      | 2.2 (1.3 to 3.4)    | 4.1 (2.4 to 6.6)     | 3.7 (2.1 to 6.2)     | 4.4 (2.5 to 7.2)     | 98 (65.3 to 133.8)      | 99.8 (60.5 to 143.9)   | 99 (62 to 139.8)      |
|       | Palestine | Incidence  | 1.8 (0.8 to 3.8)                    | 1.5 (0.5 to 3.6)    | 2.1 (1 to 4.4)      | 2.8 (1.4 to 5.4)     | 2.2 (0.9 to 5.1)     | 3.4 (1.7 to 6.4)     | 55.7 (38.4 to 85)       | 49.9 (35.2 to 78.4)    | 57 (37.7 to 87.1)     |
|       |           | Prevalence | 49.1 (31.9 to 81)                   | 49 (29.4 to 83.7)   | 49.3 (29.5 to 82.5) | 78.3 (50.3 to 125)   | 81 (49.7 to 135.1)   | 75.8 (45.9 to 125.1) | 59.6 (45.9 to 77.9)     | 65.4 (47.6 to 88.8)    | 53.7 (38.6 to 72.1)   |
|       |           | Deaths     | 1.4 (0.8 to 2.2)                    | 1.2 (0.7 to 2)      | 1.6 (0.9 to 2.7)    | 1 (0.6 to 1.5)       | 0.8 (0.5 to 1.2)     | 1.2 (0.7 to 1.7)     | -31.1 (-49 to -6.8)     | -35.1 (-52.7 to -9.4)  | -29.6 (-48.3 to -2.5) |
|       |           | DALYs      | 49.9 (30.3 to 77)                   | 45.3 (27.4 to 70.6) | 56.1 (32.5 to 89.1) | 35.8 (24.2 to 51.4)  | 30.4 (20.4 to 43.5)  | 41.2 (27 to 60.2)    | -28.3 (-46.8 to -2.5)   | -32.9 (-50.8 to -6.8)  | -26.6 (-45.8 to 1.7)  |
|       |           | YLLs       | 47.5 (28.2 to 74.8)                 | 43 (25.4 to 68)     | 53.5 (30.3 to 86.5) | 31.9 (20.4 to 46.9)  | 26.8 (17.1 to 39.5)  | 37 (23.7 to 55.4)    | -32.8 (-51.2 to -7.6)   | -37.8 (-55.5 to -11.7) | -30.7 (-49.6 to -1.8) |
|       |           | YLDs       | 2.4 (1.4 to 4.1)                    | 2.3 (1.3 to 4)      | 2.6 (1.5 to 4.4)    | 3.9 (2.2 to 6.5)     | 3.6 (2 to 6.5)       | 4.2 (2.3 to 7)       | 59.7 (38.5 to 82)       | 58.2 (34 to 83.4)      | 58.4 (35.8 to 84.2)   |

| Cause | Location     | Measure    | Age-standardized rate (per 100,000) |                     |                     |                      |                       |                      | % Change (1990 to 2019) |                        |                        |
|-------|--------------|------------|-------------------------------------|---------------------|---------------------|----------------------|-----------------------|----------------------|-------------------------|------------------------|------------------------|
|       |              |            | 1990                                |                     |                     | 2019                 |                       |                      |                         |                        |                        |
|       |              |            | Both                                | Female              | Male                | Both                 | Female                | Male                 | Both                    | Female                 | Male                   |
|       | Qatar        | Incidence  | 1.3 (0.6 to 2.8)                    | 1.1 (0.4 to 2.7)    | 1.4 (0.6 to 3)      | 2.4 (1.2 to 4.8)     | 1.9 (0.7 to 4.7)      | 2.6 (1.2 to 5.3)     | 87.4 (68 to 120.4)      | 72.1 (56 to 92)        | 90.8 (68.4 to 124.7)   |
|       |              | Prevalence | 36.1 (23 to 60.5)                   | 38 (22.2 to 65.2)   | 35.4 (21.4 to 59.6) | 60 (38 to 100.9)     | 64.1 (37.4 to 113.5)  | 59.9 (36.9 to 101.7) | 66.3 (51.4 to 83)       | 68.7 (51.3 to 86.6)    | 69 (52 to 87.9)        |
|       |              | Deaths     | 1 (0.6 to 1.7)                      | 1.2 (0.6 to 2.1)    | 1 (0.5 to 1.7)      | 0.7 (0.4 to 1.1)     | 1 (0.6 to 1.5)        | 0.6 (0.4 to 1)       | -29.4 (-52.8 to 1.5)    | -16.7 (-51.6 to 26.5)  | -34.9 (-55.1 to -1.1)  |
|       |              | DALYs      | 28.6 (17.1 to 46.4)                 | 34.3 (20 to 59.6)   | 26.7 (15.5 to 43.8) | 19.3 (12.4 to 28.1)  | 23.5 (15.1 to 35.3)   | 17.9 (11.5 to 26.5)  | -32.6 (-52 to -6.5)     | -31.5 (-57 to -1.4)    | -32.9 (-52.6 to -3.3)  |
|       |              | YLLs       | 26.6 (15.3 to 44)                   | 32.4 (18 to 57.7)   | 24.6 (13.7 to 41.4) | 16 (9.5 to 24.6)     | 20.4 (12.4 to 32)     | 14.5 (8.6 to 22.4)   | -39.8 (-58.3 to -13.7)  | -36.8 (-61.5 to -5.6)  | -41.1 (-59.8 to -10.9) |
|       |              | YLDs       | 2.1 (1.2 to 3.3)                    | 1.9 (1.1 to 3.2)    | 2.1 (1.2 to 3.5)    | 3.3 (1.8 to 5.7)     | 3 (1.6 to 5.6)        | 3.4 (1.9 to 5.9)     | 60.4 (36.2 to 85.7)     | 59.2 (30.6 to 90.4)    | 61.9 (37 to 88)        |
|       | Saudi Arabia | Incidence  | 1.7 (0.9 to 3.2)                    | 1.5 (0.7 to 3.1)    | 1.8 (0.9 to 3.4)    | 4.2 (2.5 to 7.1)     | 3.5 (1.7 to 6.7)      | 4.6 (2.6 to 7.7)     | 145.2 (112.3 to 199.9)  | 127.6 (100.4 to 170.4) | 154.5 (114.8 to 223.1) |
|       |              | Prevalence | 47.7 (33.8 to 71)                   | 52.6 (34.8 to 79.7) | 44.5 (29.3 to 69.2) | 97.3 (70.4 to 142.3) | 102.6 (67.9 to 154.2) | 93.6 (65 to 140.2)   | 104.1 (83.5 to 127.7)   | 94.9 (71.3 to 122)     | 110.5 (85.6 to 143)    |
|       |              | Deaths     | 1.6 (0.9 to 2.6)                    | 1.4 (0.8 to 2.4)    | 1.7 (0.9 to 2.9)    | 1.6 (0.9 to 2.5)     | 1.6 (0.9 to 2.4)      | 1.6 (0.9 to 2.5)     | -0.4 (-33.1 to 47.8)    | 8.7 (-33.7 to 63.3)    | -6.5 (-40.1 to 48.6)   |
|       |              | DALYs      | 55.3 (32.4 to 87.8)                 | 54.6 (31.1 to 88.1) | 56.1 (31.4 to 93.6) | 57.3 (35.5 to 89.5)  | 60.2 (35.7 to 93.3)   | 55.5 (33.7 to 87.7)  | 3.7 (-29.6 to 53.3)     | 10.3 (-30.9 to 67.2)   | -1.1 (-36.5 to 53.3)   |
|       |              | YLLs       | 52.4 (29.8 to 84.8)                 | 51.8 (28.3 to 84.9) | 53.2 (28.8 to 90.1) | 51.6 (30.2 to 82.8)  | 54.7 (31.2 to 87.1)   | 49.7 (28.5 to 80.5)  | -1.5 (-35.4 to 49.6)    | 5.7 (-36.4 to 64.1)    | -6.7 (-41.5 to 49.8)   |
|       |              | YLDs       | 2.8 (1.8 to 4.3)                    | 2.8 (1.7 to 4.4)    | 2.9 (1.7 to 4.4)    | 5.7 (3.4 to 9)       | 5.5 (2.9 to 9)        | 5.8 (3.3 to 9.2)     | 99 (64.6 to 140.2)      | 94.2 (52.4 to 139.4)   | 102 (58.3 to 151.1)    |



| Cause | Location             | Measure    | Age-standardized rate (per 100,000) |                     |                     |                      |                      |                      | % Change (1990 to 2019) |                        |                        |
|-------|----------------------|------------|-------------------------------------|---------------------|---------------------|----------------------|----------------------|----------------------|-------------------------|------------------------|------------------------|
|       |                      |            | 1990                                |                     |                     | 2019                 |                      |                      |                         |                        |                        |
|       |                      |            | Both                                | Female              | Male                | Both                 | Female               | Male                 | Both                    | Female                 | Male                   |
|       | Sudan                | Incidence  | 1.1 (0.5 to 2.2)                    | 0.9 (0.3 to 2)      | 1.3 (0.6 to 2.6)    | 2 (1.1 to 4.1)       | 1.6 (0.6 to 3.5)     | 2.5 (1.3 to 4.8)     | 89.7 (73.4 to 119.7)    | 78.2 (61.6 to 102)     | 95.9 (75.7 to 130.4)   |
|       |                      | Prevalence | 34.6 (22.7 to 53.1)                 | 34.8 (20.8 to 56)   | 34.3 (21.1 to 54.6) | 59.5 (38.4 to 93.6)  | 59.5 (35.2 to 98.3)  | 58.8 (36.2 to 93.8)  | 71.8 (53.9 to 89.9)     | 71.1 (50.1 to 93.2)    | 71.2 (50 to 93.4)      |
|       |                      | Deaths     | 0.8 (0.5 to 1.4)                    | 0.8 (0.4 to 1.3)    | 0.9 (0.5 to 1.5)    | 0.8 (0.4 to 1.4)     | 0.7 (0.4 to 1.3)     | 0.8 (0.4 to 1.6)     | -7.4 (-43 to 44.9)      | -7.3 (-50 to 44.1)     | -8.1 (-43.5 to 65.6)   |
|       |                      | DALYs      | 31 (18.2 to 47.9)                   | 29.5 (16.5 to 48.5) | 32.1 (19 to 50.7)   | 29 (16.4 to 49)      | 27.3 (14.7 to 47.1)  | 30.3 (16.3 to 56)    | -6.5 (-41.3 to 44.5)    | -7.6 (-48.3 to 45.6)   | -5.7 (-41.7 to 68.1)   |
|       |                      | YLLs       | 29.6 (17.2 to 46.6)                 | 28.3 (15.2 to 47.4) | 30.6 (18 to 48.7)   | 26.3 (13.8 to 46.2)  | 24.9 (12.5 to 44.8)  | 27.3 (13.2 to 53.6)  | -11.2 (-47.2 to 41.7)   | -11.9 (-53.3 to 42.7)  | -10.8 (-47.4 to 66.1)  |
|       |                      | YLDs       | 1.4 (0.8 to 2.2)                    | 1.3 (0.7 to 2.2)    | 1.5 (0.9 to 2.4)    | 2.7 (1.5 to 4.5)     | 2.4 (1.2 to 4.3)     | 3 (1.7 to 4.8)       | 96.1 (74.2 to 121)      | 90.1 (60.4 to 122.8)   | 99.1 (72.9 to 132.2)   |
|       | Syrian Arab Republic | Incidence  | 1.7 (0.8 to 3.8)                    | 1.4 (0.5 to 3.3)    | 2 (0.9 to 4.4)      | 2.8 (1.5 to 5.2)     | 2.2 (1 to 4.6)       | 3.4 (1.8 to 6.4)     | 61.2 (35.8 to 114.8)    | 51.8 (28.9 to 96.6)    | 69.2 (39.2 to 130.1)   |
|       |                      | Prevalence | 44.5 (28.7 to 73.8)                 | 43.7 (27.5 to 72.9) | 45.2 (27.5 to 79.6) | 77.4 (52.9 to 117.9) | 78.1 (49.6 to 123.2) | 74.7 (48.8 to 120.7) | 74 (51.7 to 101)        | 78.9 (54.2 to 107.9)   | 65.1 (45.8 to 92.4)    |
|       |                      | Deaths     | 1.3 (0.8 to 2)                      | 1.2 (0.7 to 1.8)    | 1.4 (0.8 to 2.1)    | 0.7 (0.4 to 1.2)     | 0.7 (0.4 to 1.1)     | 0.8 (0.5 to 1.3)     | -41.9 (-60 to -16.5)    | -41.9 (-61.5 to -12.4) | -41.7 (-61.3 to -13.4) |
|       |                      | DALYs      | 49.7 (31.2 to 75.3)                 | 47.4 (29.1 to 72.9) | 51.7 (31.4 to 79.2) | 28.9 (17.8 to 45.3)  | 26.7 (16.2 to 41.3)  | 30.7 (19.1 to 49)    | -41.8 (-58.7 to -17.8)  | -43.7 (-62.4 to -15.5) | -40.5 (-58.4 to -14.2) |
|       |                      | YLLs       | 47.4 (29.4 to 71.6)                 | 45.3 (26.9 to 70.6) | 49.3 (29.3 to 77.3) | 25.1 (14.8 to 40.8)  | 23.3 (13.3 to 37.1)  | 26.7 (15.7 to 44.3)  | -47 (-64.1 to -22.9)    | -48.6 (-66.7 to -20.9) | -45.8 (-63.2 to -18.6) |
|       |                      | YLDs       | 2.3 (1.4 to 3.7)                    | 2.1 (1.2 to 3.7)    | 2.4 (1.4 to 3.9)    | 3.8 (2.2 to 6.2)     | 3.4 (1.8 to 6)       | 4 (2.4 to 6.7)       | 65.3 (43.3 to 91.6)     | 60.6 (33.4 to 91.5)    | 67.5 (42.5 to 97.6)    |

| Cause | Location | Measure    | Age-standardized rate (per 100,000) |                     |                     |                      |                      |                      | % Change (1990 to 2019) |                        |                        |
|-------|----------|------------|-------------------------------------|---------------------|---------------------|----------------------|----------------------|----------------------|-------------------------|------------------------|------------------------|
|       |          |            | 1990                                |                     |                     | 2019                 |                      |                      |                         |                        |                        |
|       |          |            | Both                                | Female              | Male                | Both                 | Female               | Male                 | Both                    | Female                 | Male                   |
|       | Tunisia  | Incidence  | 1.2 (0.6 to 2.4)                    | 1 (0.4 to 2.3)      | 1.3 (0.6 to 2.5)    | 2.4 (1.3 to 4.5)     | 1.9 (0.9 to 4)       | 2.8 (1.5 to 5.1)     | 103.4 (77.3 to 149.3)   | 86.9 (63.6 to 127.4)   | 117.3 (86.3 to 171.9)  |
|       |          | Prevalence | 37.6 (24.3 to 60.3)                 | 39.8 (24.2 to 64.3) | 35.3 (21.8 to 57.3) | 68 (45.3 to 103.3)   | 71 (43.5 to 111.1)   | 64.6 (40.7 to 102.6) | 80.9 (62.9 to 103.1)    | 78.2 (58.1 to 103.3)   | 83 (60.2 to 111.6)     |
|       |          | Deaths     | 0.6 (0.4 to 0.9)                    | 0.5 (0.3 to 0.8)    | 0.6 (0.4 to 1)      | 0.5 (0.3 to 0.9)     | 0.5 (0.3 to 0.8)     | 0.6 (0.3 to 1)       | -6.5 (-36.7 to 32.9)    | -8.9 (-41.7 to 33.6)   | -3.6 (-38.6 to 42.9)   |
|       |          | DALYs      | 20.8 (13.2 to 31.8)                 | 20.1 (12.8 to 30)   | 21.5 (12.9 to 33.1) | 20.8 (13.1 to 32.4)  | 19.2 (11.9 to 29.8)  | 22.4 (13.4 to 35.3)  | -0.1 (-28.2 to 37.4)    | -4.4 (-33.6 to 34)     | 4.5 (-27.7 to 44.9)    |
|       |          | YLLs       | 18.6 (11.4 to 28.7)                 | 18 (11 to 27.7)     | 19.2 (11.1 to 30.3) | 17.1 (9.9 to 28.2)   | 15.8 (8.8 to 25.9)   | 18.5 (10.3 to 31)    | -8 (-38.8 to 32.9)      | -12.2 (-44.8 to 31)    | -3.6 (-38.1 to 41.6)   |
|       |          | YLDs       | 2.2 (1.4 to 3.5)                    | 2.1 (1.3 to 3.4)    | 2.3 (1.3 to 3.7)    | 3.7 (2.2 to 6.1)     | 3.4 (1.9 to 6)       | 3.9 (2.3 to 6.4)     | 67.2 (43.9 to 94.4)     | 62 (34.2 to 91.9)      | 72.1 (44 to 104.5)     |
|       | Turkey   | Incidence  | 1.3 (0.6 to 2.7)                    | 1 (0.4 to 2.2)      | 1.6 (0.8 to 3.3)    | 2.9 (1.6 to 5)       | 2.1 (1 to 4.3)       | 3.7 (2.1 to 6.4)     | 120.8 (80.5 to 190.2)   | 115.1 (75.4 to 191.3)  | 125.3 (81.9 to 195.8)  |
|       |          | Prevalence | 45.2 (30.5 to 69.3)                 | 44.3 (28.5 to 70.4) | 46.1 (28.8 to 73.1) | 88.1 (61.9 to 128.5) | 90.1 (58.7 to 136.1) | 87 (56.7 to 132.6)   | 95 (76.9 to 118.3)      | 103.2 (81.7 to 131.6)  | 88.6 (67.3 to 117.3)   |
|       |          | Deaths     | 1.2 (0.7 to 1.8)                    | 0.9 (0.5 to 1.4)    | 1.4 (0.9 to 2.3)    | 0.6 (0.4 to 0.9)     | 0.5 (0.3 to 0.7)     | 0.7 (0.5 to 1.1)     | -48.1 (-63.7 to -29.5)  | -46.2 (-65.1 to -25.8) | -49.5 (-65.7 to -27.3) |
|       |          | DALYs      | 42.2 (26.8 to 62)                   | 33.6 (21 to 51.3)   | 51.2 (32 to 77.5)   | 23.4 (15.5 to 33.4)  | 18.8 (12.4 to 27.1)  | 28.1 (18.3 to 40.5)  | -44.6 (-59.1 to -27.2)  | -44 (-61.4 to -23.7)   | -45 (-60.4 to -23.2)   |
|       |          | YLLs       | 39.7 (24.6 to 59.2)                 | 31.3 (19.2 to 48.5) | 48.3 (29.7 to 74.1) | 18.8 (11.6 to 28.2)  | 14.8 (9.2 to 22.4)   | 23 (14 to 35.1)      | -52.5 (-66.4 to -35.9)  | -52.8 (-68.6 to -34)   | -52.4 (-67.2 to -31.9) |
|       |          | YLDs       | 2.6 (1.6 to 3.9)                    | 2.3 (1.4 to 3.5)    | 2.9 (1.8 to 4.3)    | 4.6 (2.8 to 7)       | 4 (2.4 to 6.5)       | 5.2 (3.1 to 7.9)     | 77.5 (51.6 to 106)      | 76.4 (44.7 to 113.4)   | 79.4 (50.8 to 111.5)   |

| Cause | Location             | Measure    | Age-standardized rate (per 100,000) |                     |                      |                      |                      |                      | % Change (1990 to 2019) |                       |                       |
|-------|----------------------|------------|-------------------------------------|---------------------|----------------------|----------------------|----------------------|----------------------|-------------------------|-----------------------|-----------------------|
|       |                      |            | 1990                                |                     |                      | 2019                 |                      |                      |                         |                       |                       |
|       |                      |            | Both                                | Female              | Male                 | Both                 | Female               | Male                 | Both                    | Female                | Male                  |
|       | United Arab Emirates | Incidence  | 1.7 (0.8 to 3.6)                    | 1.3 (0.5 to 3)      | 1.9 (0.9 to 4.1)     | 3.6 (1.9 to 6.6)     | 2.5 (1.1 to 5.2)     | 4 (2.1 to 7.6)       | 109.7 (77.4 to 170.2)   | 97.2 (70.8 to 150.9)  | 108.3 (76.1 to 168)   |
|       |                      | Prevalence | 44.8 (28.6 to 71.2)                 | 43 (26.2 to 72.8)   | 46.1 (28.4 to 75.6)  | 86 (57.7 to 133.1)   | 85 (54.7 to 135.6)   | 86.9 (56.2 to 139)   | 91.9 (72.7 to 115.9)    | 97.6 (77.6 to 123.5)  | 88.8 (69 to 115.5)    |
|       |                      | Deaths     | 2 (1.2 to 3)                        | 1.7 (0.9 to 2.9)    | 2.1 (1.2 to 3.3)     | 1.7 (0.9 to 3.1)     | 1.5 (0.8 to 2.5)     | 1.7 (0.9 to 3.4)     | -13.5 (-44 to 33.3)     | -13.1 (-53.2 to 36)   | -15.7 (-47.1 to 40.5) |
|       |                      | DALYs      | 66.8 (40.8 to 102.3)                | 59.5 (33.6 to 97.9) | 70 (41.6 to 110.8)   | 63.3 (35.3 to 113.6) | 56.1 (30.3 to 88.6)  | 65.3 (35.6 to 127)   | -5.3 (-38 to 44.3)      | -5.7 (-48.2 to 46)    | -6.8 (-41.3 to 54.2)  |
|       |                      | YLLs       | 64.4 (38.2 to 99.8)                 | 57.4 (31.8 to 95.9) | 67.4 (39.2 to 108.2) | 58.5 (31 to 109.4)   | 52 (27 to 85)        | 60.2 (31 to 120.9)   | -9.2 (-43.4 to 41.6)    | -9.3 (-52.6 to 44.7)  | -10.8 (-46 to 52.5)   |
|       |                      | YLDs       | 2.4 (1.5 to 4)                      | 2.1 (1.2 to 3.5)    | 2.6 (1.5 to 4.4)     | 4.8 (2.9 to 8)       | 4 (2.3 to 7.1)       | 5.1 (2.9 to 8.6)     | 97.7 (70.4 to 131.9)    | 92.4 (57.8 to 131.8)  | 98 (67.6 to 135.5)    |
|       | Yemen                | Incidence  | 1.3 (0.7 to 2.5)                    | 1 (0.4 to 2.3)      | 1.6 (0.8 to 3)       | 2.4 (1.3 to 4.4)     | 1.8 (0.8 to 4)       | 2.9 (1.6 to 5.2)     | 83.6 (65 to 110.7)      | 80.9 (57.3 to 120.5)  | 86.7 (64.5 to 119.1)  |
|       |                      | Prevalence | 44.6 (30.6 to 67.4)                 | 45.7 (29 to 71.3)   | 43.4 (27.6 to 67.1)  | 75.5 (51.5 to 116)   | 78.5 (49.6 to 126.5) | 72.4 (46.2 to 111.4) | 69.2 (53.7 to 88.3)     | 72 (52.1 to 97.9)     | 66.9 (49.1 to 86.8)   |
|       |                      | Deaths     | 0.8 (0.5 to 1.4)                    | 0.7 (0.4 to 1.3)    | 1 (0.5 to 1.6)       | 0.7 (0.4 to 1.2)     | 0.6 (0.3 to 1)       | 0.8 (0.5 to 1.3)     | -13.7 (-39.6 to 25)     | -11.1 (-42.8 to 34.5) | -16.3 (-42.6 to 24.6) |
|       |                      | DALYs      | 30.4 (17 to 50.8)                   | 26.6 (13.9 to 47.5) | 34.1 (19.2 to 56.1)  | 27.7 (16.4 to 43.4)  | 25.1 (14.6 to 41.8)  | 30.3 (17.9 to 47.8)  | -8.8 (-36.4 to 32)      | -5.6 (-39.2 to 44)    | -10.9 (-39.2 to 33.8) |
|       |                      | YLLs       | 28.3 (15.2 to 48.3)                 | 24.7 (12.3 to 46)   | 31.9 (17.3 to 54)    | 24 (13.2 to 40.4)    | 21.5 (11.4 to 37.8)  | 26.6 (14.6 to 44.3)  | -15.3 (-42.8 to 27.9)   | -12.8 (-46.3 to 39.2) | -16.8 (-44.8 to 30)   |
|       |                      | YLDs       | 2 (1.2 to 3.1)                      | 1.9 (1.1 to 3.1)    | 2.1 (1.2 to 3.3)     | 3.7 (2.2 to 5.7)     | 3.6 (1.9 to 6.1)     | 3.8 (2.2 to 6.1)     | 81.3 (56.8 to 107.1)    | 87.9 (52.2 to 129.6)  | 76.7 (51.3 to 104.6)  |

| Cause                                                  | Location                     | Measure    | Age-standardized rate (per 100,000) |                           |                           |                           |                           |                           | % Change (1990 to 2019) |                      |                       |
|--------------------------------------------------------|------------------------------|------------|-------------------------------------|---------------------------|---------------------------|---------------------------|---------------------------|---------------------------|-------------------------|----------------------|-----------------------|
|                                                        |                              |            | 1990                                |                           |                           | 2019                      |                           |                           |                         |                      |                       |
|                                                        |                              |            | Both                                | Female                    | Male                      | Both                      | Female                    | Male                      | Both                    | Female               | Male                  |
| Chronic kidney disease due to diabetes mellitus type 2 | North Africa and Middle East | Incidence  | 35.1 (31.7 to 38.8)                 | 37 (33.2 to 41.4)         | 33.2 (30.1 to 36.7)       | 61.3 (56 to 67.4)         | 58.8 (53.7 to 64.7)       | 63.8 (58 to 70.4)         | 74.9 (70.3 to 80.1)     | 58.9 (53.7 to 64.7)  | 92.2 (86.3 to 98.2)   |
|                                                        |                              | Prevalence | 1413.4 (1306.5 to 1526)             | 1489.8 (1372.8 to 1610.8) | 1340.6 (1237.9 to 1445.6) | 1762.5 (1636.5 to 1893.4) | 1772.3 (1641.7 to 1904.1) | 1757.8 (1630.1 to 1884.7) | 24.7 (21.2 to 28.2)     | 19 (15.2 to 22.7)    | 31.1 (27.1 to 35.3)   |
|                                                        |                              | Deaths     | 10.7 (8.3 to 14)                    | 10.2 (7.8 to 14.4)        | 11.3 (8.7 to 15.4)        | 9.6 (7.5 to 12)           | 9.6 (7.3 to 12.2)         | 9.6 (7.4 to 12.4)         | -10.2 (-28.9 to 8.2)    | -5.5 (-29.8 to 12)   | -15.2 (-35.1 to 10.7) |
|                                                        |                              | DALYs      | 222.2 (175.5 to 274.4)              | 218.8 (172 to 285.7)      | 226.5 (177.2 to 287.6)    | 205.9 (162.4 to 253.6)    | 207.4 (160.2 to 257)      | 204.8 (159.8 to 263.7)    | -7.3 (-24.6 to 9.3)     | -5.2 (-27.8 to 11.7) | -9.6 (-29.6 to 14.3)  |
|                                                        |                              | YLLs       | 203.5 (159.4 to 254.8)              | 198.6 (154.1 to 262.2)    | 209.3 (161.9 to 270.7)    | 176.6 (133.7 to 223.8)    | 179.2 (133.8 to 227.9)    | 174.1 (133 to 230.8)      | -13.2 (-31.2 to 4.6)    | -9.8 (-33.2 to 8.3)  | -16.8 (-36.1 to 8.8)  |
|                                                        |                              | YLDs       | 18.6 (13.5 to 25.6)                 | 20.1 (14.5 to 27.3)       | 17.2 (12.1 to 24)         | 29.4 (20.7 to 41)         | 28.1 (20 to 38.5)         | 30.7 (20.9 to 44.1)       | 57.6 (47.9 to 67.8)     | 39.7 (30.8 to 49.5)  | 78.6 (66.2 to 91.2)   |
|                                                        | Afghanistan                  | Incidence  | 32 (28.1 to 36.5)                   | 33.8 (29.2 to 39)         | 30.4 (26.8 to 34.4)       | 51.7 (45.5 to 58.9)       | 49.7 (43 to 56.8)         | 54 (47.5 to 61.2)         | 61.4 (53.9 to 69.6)     | 46.9 (38.5 to 58.4)  | 77.9 (68 to 88.4)     |
|                                                        |                              | Prevalence | 1366 (1244 to 1506.6)               | 1454.4 (1310 to 1620.8)   | 1266.5 (1146.4 to 1400.4) | 1608.3 (1474.1 to 1743.6) | 1650.4 (1492.6 to 1812.8) | 1571.7 (1431.5 to 1719.3) | 17.7 (13.2 to 22.6)     | 13.5 (8.7 to 19)     | 24.1 (18.6 to 30)     |
|                                                        |                              | Deaths     | 17.6 (12.1 to 27.9)                 | 16.7 (11.2 to 29.3)       | 18.3 (12.2 to 28.7)       | 16.1 (11.2 to 25.5)       | 16.1 (10.5 to 27.8)       | 16 (10.3 to 25.9)         | -8.5 (-30.5 to 18.3)    | -3.9 (-36.9 to 34.5) | -12.3 (-34.4 to 12.4) |
|                                                        |                              | DALYs      | 388.7 (269.2 to 566.2)              | 394.4 (270.4 to 613.4)    | 379 (253.5 to 568.4)      | 351.7 (249.8 to 512.9)    | 368.4 (250.4 to 573.6)    | 333.8 (222.6 to 504.6)    | -9.5 (-32.6 to 18.2)    | -6.6 (-38.2 to 30.5) | -11.9 (-35.3 to 15.6) |
|                                                        |                              | YLLs       | 370.7 (252.6 to 548.2)              | 374 (249.5 to 592.3)      | 363.6 (237.3 to 551.5)    | 324.4 (223.2 to 486.3)    | 340.4 (221.5 to 540.5)    | 307.1 (198.5 to 477.7)    | -12.5 (-35.6 to 16.9)   | -9 (-41.4 to 29.8)   | -15.5 (-38.7 to 13.8) |
|                                                        |                              | YLDs       | 18 (12.5 to 24.8)                   | 20.4 (14.2 to 27.9)       | 15.5 (10.4 to 22.5)       | 27.3 (18.8 to 38.4)       | 28.1 (19.3 to 39.1)       | 26.7 (17.9 to 38.9)       | 51.7 (35.8 to 68.7)     | 37.7 (19.3 to 58)    | 72.3 (46.8 to 102.2)  |

| Cause | Location | Measure    | Age-standardized rate (per 100,000) |                           |                           |                           |                           |                           | % Change (1990 to 2019) |                       |                      |
|-------|----------|------------|-------------------------------------|---------------------------|---------------------------|---------------------------|---------------------------|---------------------------|-------------------------|-----------------------|----------------------|
|       |          |            | 1990                                |                           |                           | 2019                      |                           |                           |                         |                       |                      |
|       |          |            | Both                                | Female                    | Male                      | Both                      | Female                    | Male                      | Both                    | Female                | Male                 |
|       | Algeria  | Incidence  | 36.5 (32.3 to 41.2)                 | 39.4 (34.4 to 45.4)       | 33.3 (29 to 37.9)         | 62.5 (55.2 to 70.4)       | 60.8 (53.5 to 68.3)       | 64.2 (55.8 to 73.4)       | 71.6 (63.7 to 79.4)     | 54.3 (45.1 to 64.3)   | 93 (79.1 to 106.4)   |
|       |          | Prevalence | 1436.1 (1308.1 to 1575.9)           | 1533.7 (1377.2 to 1705.7) | 1338.1 (1209.1 to 1468.7) | 1778.4 (1627.1 to 1940.8) | 1813.2 (1646.4 to 1984.1) | 1741.2 (1580.7 to 1909)   | 23.8 (18.6 to 28.6)     | 18.2 (12.5 to 23.6)   | 30.1 (23.9 to 36.6)  |
|       |          | Deaths     | 11.5 (8.3 to 16.9)                  | 12 (7.8 to 20.9)          | 11.1 (8.2 to 15.3)        | 9.6 (6.8 to 13.2)         | 11.3 (7.7 to 17.1)        | 8.4 (5.8 to 11.8)         | -16.6 (-36.5 to 10.6)   | -6 (-31.3 to 28.8)    | -24.9 (-45.1 to 5.2) |
|       |          | DALYs      | 218.1 (158.1 to 310.7)              | 231 (158.2 to 379.8)      | 205.9 (150.6 to 282)      | 187.5 (138.8 to 254.1)    | 211.6 (151.4 to 307.1)    | 166.9 (120.4 to 232.7)    | -14 (-34.7 to 12.5)     | -8.4 (-33.5 to 24.4)  | -19 (-40 to 9.8)     |
|       |          | YLLs       | 199.6 (139.1 to 293.2)              | 210.1 (137.2 to 358.1)    | 189.7 (135.9 to 264.8)    | 157.8 (111 to 222.4)      | 182.2 (121.9 to 276)      | 136.9 (92.4 to 199.2)     | -20.9 (-41.9 to 7.2)    | -13.3 (-38.3 to 21.7) | -27.8 (-48.3 to 2.7) |
|       |          | YLDs       | 18.5 (12.9 to 26)                   | 20.8 (14.6 to 29.2)       | 16.2 (10.7 to 23.8)       | 29.7 (20.2 to 42.5)       | 29.4 (20.5 to 41.4)       | 30 (19.8 to 44.5)         | 60.7 (42.1 to 81.1)     | 41.1 (20.4 to 63.8)   | 85.3 (56 to 118.7)   |
|       | Bahrain  | Incidence  | 43.6 (39 to 49.1)                   | 46.4 (41 to 52.2)         | 41.7 (36.5 to 47.4)       | 74.2 (66.4 to 82.6)       | 67.9 (60.8 to 75.5)       | 78.9 (69.5 to 88.5)       | 70.2 (60.9 to 80)       | 46.5 (37.3 to 56.3)   | 89.1 (75.5 to 102.1) |
|       |          | Prevalence | 1538.8 (1406.7 to 1686.8)           | 1650.5 (1498.1 to 1829.9) | 1466.6 (1330.9 to 1610.6) | 1951.2 (1784.2 to 2133.3) | 1943.6 (1770.7 to 2121.9) | 1986.9 (1803.9 to 2179.5) | 26.8 (21.5 to 32.2)     | 17.8 (12.4 to 23.4)   | 35.5 (28.5 to 42.3)  |
|       |          | Deaths     | 13.1 (10 to 16.9)                   | 13.2 (9.6 to 17.1)        | 13.3 (9.8 to 18.6)        | 11.9 (8.9 to 15.4)        | 11.8 (8.6 to 15.3)        | 12.1 (8.8 to 16.5)        | -8.8 (-29.2 to 15.2)    | -10 (-34.3 to 17.4)   | -8.7 (-30.6 to 19.2) |
|       |          | DALYs      | 246.9 (193.6 to 311.2)              | 260 (195.8 to 331.1)      | 240 (181.7 to 324.3)      | 219.5 (171.2 to 276.7)    | 219.3 (167 to 277.4)      | 222.5 (168.3 to 286.4)    | -11.1 (-30 to 10.7)     | -15.7 (-36.9 to 9.3)  | -7.3 (-28.7 to 18.6) |
|       |          | YLLs       | 224.6 (170.1 to 287.6)              | 235.5 (171.5 to 308.3)    | 219.3 (162.7 to 302.6)    | 183.2 (134.9 to 236.2)    | 186.3 (134.7 to 241.9)    | 183.3 (131.3 to 247.4)    | -18.4 (-37.3 to 4.5)    | -20.9 (-42.7 to 6.7)  | -16.4 (-37.3 to 10)  |
|       |          | YLDs       | 22.3 (15.3 to 31.2)                 | 24.5 (17 to 34.6)         | 20.7 (13.8 to 29.8)       | 36.3 (24.2 to 53.2)       | 33 (22.5 to 47.5)         | 39.1 (25.2 to 58.2)       | 62.8 (43.9 to 84.8)     | 34.7 (16.4 to 57.9)   | 88.7 (61 to 122.2)   |

| Cause | Location                   | Measure    | Age-standardized rate (per 100,000) |                           |                           |                           |                           |                           | % Change (1990 to 2019) |                       |                       |
|-------|----------------------------|------------|-------------------------------------|---------------------------|---------------------------|---------------------------|---------------------------|---------------------------|-------------------------|-----------------------|-----------------------|
|       |                            |            | 1990                                |                           |                           | 2019                      |                           |                           |                         |                       |                       |
|       |                            |            | Both                                | Female                    | Male                      | Both                      | Female                    | Male                      | Both                    | Female                | Male                  |
|       | Egypt                      | Incidence  | 36.5 (32.2 to 41.6)                 | 42 (36.7 to 48.4)         | 31 (27.2 to 35.3)         | 65.6 (58.4 to 73.7)       | 65.1 (57.8 to 73.7)       | 65.6 (57.6 to 75.1)       | 79.9 (72.8 to 87.8)     | 55.2 (47.1 to 64.1)   | 111.6 (98.9 to 124)   |
|       |                            | Prevalence | 1379.8 (1254.5 to 1509.1)           | 1511 (1366.3 to 1674.6)   | 1249.2 (1128 to 1375.5)   | 1829.9 (1671 to 1986.6)   | 1876.1 (1703.8 to 2052.5) | 1783.1 (1629.2 to 1946.6) | 32.6 (27.9 to 37.3)     | 24.2 (19.2 to 29.4)   | 42.7 (35.6 to 49.9)   |
|       |                            | Deaths     | 11.9 (7.8 to 16)                    | 13.3 (7 to 19.3)          | 10.5 (7.4 to 14.8)        | 14.4 (8.5 to 21.5)        | 18.4 (8.1 to 27.5)        | 11.9 (7.3 to 20)          | 20.8 (-12.7 to 59)      | 37.8 (-11.2 to 85.9)  | 13.5 (-26 to 60.2)    |
|       |                            | DALYs      | 246.4 (167.6 to 322.2)              | 278.3 (157.8 to 388.2)    | 214.3 (154.1 to 295.5)    | 302.8 (184.5 to 442.2)    | 362.6 (179.5 to 526.2)    | 259.3 (166.9 to 419.6)    | 22.8 (-10.1 to 60.6)    | 30.3 (-12.4 to 73.7)  | 21 (-17.7 to 64.7)    |
|       |                            | YLLs       | 226.8 (146.8 to 302.3)              | 255.3 (133.1 to 363)      | 197.9 (137.9 to 279.7)    | 268.6 (149.9 to 406.8)    | 328.3 (144.5 to 492.5)    | 225.4 (133 to 383.2)      | 18.4 (-16.9 to 59.8)    | 28.6 (-17 to 76.8)    | 13.9 (-28.1 to 62.9)  |
|       |                            | YLDs       | 19.7 (14 to 27.6)                   | 23 (16.3 to 32.4)         | 16.4 (11.2 to 23.8)       | 34.2 (23.8 to 48.8)       | 34.3 (23.7 to 48.4)       | 33.9 (22.7 to 49.8)       | 73.5 (54.9 to 94.4)     | 49.1 (30 to 70.9)     | 107.1 (79.6 to 140.4) |
|       | Iran (Islamic Republic of) | Incidence  | 41.7 (37.3 to 46.6)                 | 42.9 (38.2 to 48.5)       | 40.9 (36.4 to 45.9)       | 55.6 (50.1 to 61.3)       | 55.6 (50.2 to 61.3)       | 55.3 (49.7 to 61)         | 33.1 (28.6 to 37.9)     | 29.5 (23.7 to 35.7)   | 35.4 (30.9 to 40.2)   |
|       |                            | Prevalence | 1601.5 (1480.1 to 1724.5)           | 1645.1 (1519.2 to 1776.1) | 1561.5 (1442.9 to 1681.1) | 1763.5 (1638.3 to 1890.2) | 1779.1 (1650.5 to 1907.4) | 1748.8 (1624.2 to 1877)   | 10.1 (7.5 to 13.1)      | 8.1 (5.1 to 11.5)     | 12 (9.4 to 14.9)      |
|       |                            | Deaths     | 7.3 (5.9 to 9.2)                    | 6.8 (5.2 to 9.5)          | 7.9 (6.3 to 9.6)          | 6.2 (5 to 7.4)            | 6 (4.7 to 7.2)            | 6.4 (5.2 to 7.8)          | -15.4 (-32.7 to -5.7)   | -11.8 (-41.3 to 3)    | -18.8 (-31 to -5)     |
|       |                            | DALYs      | 152.7 (124.8 to 180.4)              | 142.5 (112.7 to 179.7)    | 162.5 (132 to 193.5)      | 126.9 (105.5 to 147.6)    | 120.3 (98.9 to 141.2)     | 133.4 (110.8 to 157)      | -16.9 (-27.6 to -8.9)   | -15.6 (-35.6 to -4.4) | -17.9 (-28.3 to -6)   |
|       |                            | YLLs       | 133 (106.8 to 159.6)                | 122.4 (92.8 to 158.5)     | 143.2 (114.1 to 172.6)    | 104.7 (85.2 to 124.8)     | 99.3 (79.3 to 118.2)      | 110 (88.5 to 132.5)       | -21.3 (-33 to -12.5)    | -18.8 (-40.7 to -6.1) | -23.2 (-34.1 to -9.8) |
|       |                            | YLDs       | 19.7 (14 to 27.1)                   | 20.1 (14.2 to 27.3)       | 19.3 (13.4 to 26.9)       | 22.2 (15.4 to 30.8)       | 21 (14.8 to 28.5)         | 23.4 (16.1 to 32.6)       | 12.4 (5.4 to 19.8)      | 4.3 (-3.9 to 12.9)    | 21.4 (12.8 to 30.8)   |

| Cause | Location | Measure    | Age-standardized rate (per 100,000) |                           |                           |                           |                           |                           | % Change (1990 to 2019) |                       |                       |
|-------|----------|------------|-------------------------------------|---------------------------|---------------------------|---------------------------|---------------------------|---------------------------|-------------------------|-----------------------|-----------------------|
|       |          |            | 1990                                |                           |                           | 2019                      |                           |                           |                         |                       |                       |
|       |          |            | Both                                | Female                    | Male                      | Both                      | Female                    | Male                      | Both                    | Female                | Male                  |
|       | Iraq     | Incidence  | 40.6 (35.8 to 45.9)                 | 42.6 (37.4 to 48.3)       | 38.6 (33.6 to 43.6)       | 66.4 (59.4 to 74.2)       | 63 (56 to 70.5)           | 70.1 (61.5 to 79.4)       | 63.4 (56.1 to 70.9)     | 47.7 (39.2 to 56.6)   | 81.6 (70.7 to 93.9)   |
|       |          | Prevalence | 1587.6 (1445.8 to 1742.3)           | 1684.7 (1522.6 to 1862.4) | 1492.5 (1351.5 to 1645.1) | 1933.8 (1778.4 to 2100.7) | 1942.9 (1768.4 to 2125.9) | 1933.9 (1764.3 to 2134.7) | 21.8 (17.1 to 26.4)     | 15.3 (10.3 to 20.7)   | 29.6 (23.3 to 36)     |
|       |          | Deaths     | 15.4 (11.4 to 21.6)                 | 14.6 (10.3 to 21.9)       | 16.3 (11.7 to 23.7)       | 14.2 (10.3 to 19.1)       | 11.8 (8.5 to 16)          | 17.2 (11.9 to 24.7)       | -7.4 (-29.6 to 16)      | -19.2 (-43.5 to 12.7) | 5.2 (-22.9 to 37.2)   |
|       |          | DALYs      | 327.4 (249.4 to 430.4)              | 324.4 (231.5 to 469.3)    | 332.5 (240.4 to 450.2)    | 297.5 (225.5 to 383.9)    | 259.9 (188.8 to 344.4)    | 340.8 (248.4 to 457.4)    | -9.1 (-30.6 to 14.8)    | -19.9 (-43 to 10.7)   | 2.5 (-24.8 to 35.5)   |
|       |          | YLLs       | 303.6 (227.8 to 405.4)              | 298.6 (208.2 to 443.6)    | 310.7 (218.2 to 428.4)    | 261.1 (188.9 to 348.1)    | 225.3 (154.7 to 310.5)    | 302.3 (209.5 to 420.8)    | -14 (-36.6 to 11)       | -24.5 (-47.8 to 7.6)  | -2.7 (-30.6 to 32)    |
|       |          | YLDs       | 23.8 (17 to 33.3)                   | 25.9 (18.2 to 35.6)       | 21.8 (14.7 to 31.1)       | 36.4 (25.1 to 51.4)       | 34.6 (24.1 to 48.3)       | 38.6 (25.2 to 56.8)       | 52.9 (36.7 to 70.7)     | 33.8 (15.2 to 54.4)   | 76.8 (51.6 to 106.8)  |
|       | Jordan   | Incidence  | 40.5 (35.8 to 45.3)                 | 46.9 (41.5 to 52.8)       | 34.3 (29.7 to 38.8)       | 69.3 (62.3 to 76.9)       | 67.5 (60.3 to 75.4)       | 70.9 (62.7 to 79.9)       | 71.2 (60.8 to 81.3)     | 43.8 (34.1 to 54)     | 106.6 (89.5 to 124.7) |
|       |          | Prevalence | 1534.8 (1402.5 to 1682.6)           | 1672.1 (1524.3 to 1844.6) | 1402.7 (1270.5 to 1555.7) | 1913.5 (1753.7 to 2076.2) | 1932.5 (1765.7 to 2115.4) | 1900.8 (1739.5 to 2086.4) | 24.7 (19.4 to 30.3)     | 15.6 (9.9 to 21.5)    | 35.5 (28.5 to 44)     |
|       |          | Deaths     | 14.3 (11.2 to 17.9)                 | 15.9 (11.8 to 20.8)       | 12.6 (9.7 to 16.4)        | 12.6 (9.7 to 15.8)        | 13.4 (9.9 to 17.5)        | 11.9 (8.6 to 16.1)        | -11.3 (-31.3 to 11.9)   | -15.7 (-41.9 to 12.8) | -5.1 (-31.3 to 30.4)  |
|       |          | DALYs      | 284.3 (225.2 to 351.5)              | 320.8 (241.8 to 414.9)    | 248.6 (192.4 to 316.4)    | 255.5 (200.3 to 316.7)    | 263.6 (198.2 to 336.1)    | 247.9 (185.5 to 326.6)    | -10.1 (-28.1 to 12.5)   | -17.8 (-40.8 to 8.2)  | -0.3 (-26.4 to 36.1)  |
|       |          | YLLs       | 261.8 (203.2 to 326.9)              | 295 (215.5 to 387.5)      | 229.5 (174.3 to 296.3)    | 220.8 (168.7 to 278.9)    | 229.6 (166.6 to 301.8)    | 212.3 (153.2 to 291.4)    | -15.7 (-34.8 to 9)      | -22.2 (-46.7 to 6.1)  | -7.5 (-33.5 to 30.8)  |
|       |          | YLDs       | 22.4 (15.8 to 31.2)                 | 25.8 (18.1 to 35.9)       | 19 (12.8 to 27.3)         | 34.8 (23.5 to 49.1)       | 34 (23.5 to 47.8)         | 35.6 (23.2 to 52.2)       | 55.1 (37.4 to 74.4)     | 31.7 (13.7 to 52.5)   | 86.9 (59 to 119.1)    |

| Cause | Location | Measure    | Age-standardized rate (per 100,000) |                           |                           |                           |                           |                           | % Change (1990 to 2019) |                        |                        |
|-------|----------|------------|-------------------------------------|---------------------------|---------------------------|---------------------------|---------------------------|---------------------------|-------------------------|------------------------|------------------------|
|       |          |            | 1990                                |                           |                           | 2019                      |                           |                           |                         |                        |                        |
|       |          |            | Both                                | Female                    | Male                      | Both                      | Female                    | Male                      | Both                    | Female                 | Male                   |
|       | Kuwait   | Incidence  | 41.6 (36.9 to 46.9)                 | 48 (42.3 to 54.8)         | 38.2 (33.1 to 43.5)       | 63.3 (56 to 71.3)         | 62.2 (54.7 to 69.7)       | 63.9 (56.2 to 73.1)       | 52.4 (37.9 to 67.4)     | 29.5 (17 to 44.1)      | 67.3 (48.7 to 88.6)    |
|       |          | Prevalence | 1534.5 (1402 to 1679.3)             | 1693.8 (1537.2 to 1874.3) | 1441.3 (1307.9 to 1590)   | 1797 (1635.8 to 1959)     | 1843.6 (1681.3 to 2022.9) | 1759.6 (1602.1 to 1927.3) | 17.1 (10.8 to 23.9)     | 8.8 (2.7 to 15.9)      | 22.1 (14.4 to 30.2)    |
|       |          | Deaths     | 8.9 (7 to 10.8)                     | 10.2 (7.4 to 12.9)        | 8.1 (6.3 to 10)           | 5.2 (3.9 to 6.9)          | 5.3 (3.7 to 7.2)          | 5.2 (3.8 to 7)            | -41.2 (-51.5 to -27.5)  | -47.9 (-60 to -26.9)   | -36.1 (-48.7 to -20.5) |
|       |          | DALYs      | 186.9 (149.1 to 223.3)              | 220.5 (163 to 274.5)      | 167.4 (133.2 to 200.5)    | 116.1 (90.5 to 144)       | 119.6 (90 to 154.3)       | 113.4 (86.9 to 144.4)     | -37.9 (-47.5 to -24.4)  | -45.8 (-57.1 to -25)   | -32.2 (-44.8 to -17.5) |
|       |          | YLLs       | 166.6 (128.6 to 202.2)              | 197.4 (140.6 to 249.9)    | 148.8 (117 to 180.7)      | 87.4 (65.3 to 112.7)      | 92 (64.6 to 125.7)        | 84.3 (60.8 to 112.8)      | -47.5 (-57.1 to -34.3)  | -53.4 (-64.8 to -31.4) | -43.3 (-55.6 to -28)   |
|       |          | YLDs       | 20.3 (14.2 to 28.6)                 | 23.1 (15.9 to 32.9)       | 18.6 (12 to 27.2)         | 28.6 (19.4 to 41.6)       | 27.6 (19 to 38.9)         | 29.1 (18.9 to 44.1)       | 41.2 (22 to 63.1)       | 19.3 (1 to 41.3)       | 56.5 (30 to 90.3)      |
|       | Lebanon  | Incidence  | 36.5 (32.2 to 41.1)                 | 39.4 (34.4 to 44.8)       | 33.7 (29.4 to 38.4)       | 67.1 (60.1 to 75.1)       | 63.6 (56.7 to 71.2)       | 71.3 (63.3 to 80.7)       | 84 (73.8 to 96)         | 61.5 (51.3 to 73.9)    | 111.9 (97.3 to 129.4)  |
|       |          | Prevalence | 1460.4 (1333.9 to 1601.6)           | 1551.4 (1397.8 to 1710.5) | 1363.7 (1235.3 to 1502.2) | 1861.6 (1712.8 to 2023.9) | 1855.9 (1695.5 to 2023.3) | 1869.7 (1703.3 to 2055)   | 27.5 (22.3 to 33.3)     | 19.6 (14 to 25.4)      | 37.1 (30.1 to 44.7)    |
|       |          | Deaths     | 10.1 (7.7 to 13)                    | 9.9 (7.2 to 13.7)         | 10.4 (7.8 to 13.6)        | 7 (4.8 to 9.7)            | 6.8 (4.4 to 9.1)          | 7.2 (4.2 to 12.2)         | -30.6 (-52 to -8.2)     | -31 (-53.5 to -9.8)    | -30.3 (-59.3 to 11.4)  |
|       |          | DALYs      | 207.2 (159.4 to 263.1)              | 208.7 (156.1 to 279.3)    | 206.2 (155.6 to 268.6)    | 154 (113.2 to 206.1)      | 149.8 (106.5 to 195.1)    | 159 (104.7 to 247.2)      | -25.7 (-45.5 to -6.2)   | -28.2 (-49.3 to -7)    | -22.9 (-49.2 to 13.4)  |
|       |          | YLLs       | 188.4 (142.5 to 242.9)              | 188 (136 to 258.2)        | 189.5 (140.1 to 249.7)    | 124.1 (84.4 to 173.1)     | 121.7 (79 to 165)         | 127 (74.1 to 214.4)       | -34.2 (-54.7 to -13.2)  | -35.3 (-57.1 to -12.8) | -33 (-59.5 to 6.1)     |
|       |          | YLDs       | 18.7 (13.1 to 26.1)                 | 20.7 (14.4 to 28.8)       | 16.7 (11.2 to 24.1)       | 29.9 (20.3 to 42.2)       | 28.2 (19.4 to 39.4)       | 32 (21.2 to 47.1)         | 59.5 (42 to 80.7)       | 36.1 (16.6 to 57.8)    | 92.2 (61.7 to 127)     |



| Cause | Location | Measure    | Age-standardized rate (per 100,000) |                           |                           |                           |                           |                           | % Change (1990 to 2019) |                      |                      |
|-------|----------|------------|-------------------------------------|---------------------------|---------------------------|---------------------------|---------------------------|---------------------------|-------------------------|----------------------|----------------------|
|       |          |            | 1990                                |                           |                           | 2019                      |                           |                           |                         |                      |                      |
|       |          |            | Both                                | Female                    | Male                      | Both                      | Female                    | Male                      | Both                    | Female               | Male                 |
|       | Libya    | Incidence  | 37.2 (33.1 to 42.1)                 | 40 (35.2 to 45.3)         | 34.8 (30.6 to 39.8)       | 62 (55.2 to 69.6)         | 60.4 (53.4 to 67.7)       | 63.5 (55.9 to 71.8)       | 66.8 (59.3 to 74.4)     | 51.1 (42.6 to 61.2)  | 82.4 (70.7 to 94.9)  |
|       |          | Prevalence | 1477.5 (1345.2 to 1624.7)           | 1577.5 (1434.2 to 1747.4) | 1398.1 (1267.5 to 1551.3) | 1805 (1655.4 to 1960.4)   | 1843.7 (1681.9 to 2014.7) | 1770.3 (1611.9 to 1945.3) | 22.2 (17.9 to 26.9)     | 16.9 (11.9 to 22.9)  | 26.6 (20.9 to 33)    |
|       |          | Deaths     | 9.3 (6.4 to 12.7)                   | 9.7 (6.4 to 14)           | 8.9 (6 to 12.8)           | 9.6 (6.1 to 13.8)         | 10.4 (5.9 to 15.2)        | 8.8 (5.5 to 14.3)         | 3.9 (-25.3 to 38.6)     | 7.9 (-27.8 to 47.1)  | -1.3 (-32.4 to 46.5) |
|       |          | DALYs      | 197.8 (141.5 to 260.4)              | 216.1 (148.4 to 301.2)    | 182.7 (128 to 255.1)      | 212.4 (143.3 to 287.5)    | 234 (148.2 to 326.3)      | 191.6 (128.5 to 296.2)    | 7.4 (-19.9 to 41)       | 8.3 (-24.2 to 44.2)  | 4.9 (-25.2 to 50.5)  |
|       |          | YLLs       | 178.5 (121.6 to 242.5)              | 194.4 (126.1 to 277)      | 165.3 (111.3 to 234.1)    | 182.4 (114.1 to 258)      | 204 (118.9 to 295.4)      | 161.5 (98.6 to 263.6)     | 2.2 (-27.6 to 39.7)     | 4.9 (-31 to 45.3)    | -2.3 (-34.7 to 46.4) |
|       |          | YLDs       | 19.3 (13.5 to 26.7)                 | 21.7 (15.1 to 29.6)       | 17.3 (11.5 to 25.3)       | 30 (20.8 to 42.2)         | 30 (20.7 to 41.4)         | 30.1 (20 to 44.1)         | 55.4 (37.5 to 74.4)     | 38.4 (18.7 to 59)    | 73.6 (46.4 to 109.7) |
|       | Morocco  | Incidence  | 28.2 (24.8 to 32.2)                 | 30 (25.9 to 34.7)         | 26.4 (23.3 to 30.2)       | 59.8 (53.3 to 67.4)       | 56.3 (49.6 to 64.2)       | 63.5 (55.7 to 72.4)       | 112.2 (103.1 to 123.4)  | 87.9 (76.2 to 100.5) | 140.5 (127 to 158.5) |
|       |          | Prevalence | 1303.9 (1183.3 to 1438)             | 1381.4 (1248.7 to 1538.1) | 1223.1 (1095.3 to 1352.2) | 1745.3 (1604.3 to 1898.4) | 1755.1 (1600.6 to 1923.9) | 1738.3 (1577.6 to 1899.6) | 33.8 (28.7 to 39.9)     | 27 (21.1 to 33.8)    | 42.1 (34.9 to 50)    |
|       |          | Deaths     | 8.5 (6.1 to 12.2)                   | 7.8 (5.3 to 12.2)         | 9.3 (6.4 to 14.6)         | 10.8 (7.6 to 14.7)        | 10.6 (7.3 to 14.8)        | 10.9 (7.3 to 16.4)        | 27.1 (-6.2 to 60.6)     | 35.6 (-7.8 to 83.2)  | 17.7 (-15.1 to 56.6) |
|       |          | DALYs      | 179.3 (133.2 to 243.1)              | 174.9 (125.2 to 249.8)    | 185 (131.8 to 264.3)      | 228.5 (166.7 to 298.9)    | 233.3 (168.5 to 316.4)    | 224.4 (154 to 315.4)      | 27.4 (-5 to 59.7)       | 33.4 (-7.6 to 78.9)  | 21.4 (-12 to 58)     |
|       |          | YLLs       | 164 (118.1 to 226.4)                | 158 (109.8 to 230.5)      | 171.4 (116.9 to 250.7)    | 198 (138.1 to 266.1)      | 204.1 (139.7 to 284.6)    | 192.6 (123.7 to 283.9)    | 20.7 (-12.7 to 54.9)    | 29.2 (-14.6 to 80.4) | 12.4 (-20.8 to 50.6) |
|       |          | YLDs       | 15.3 (10.6 to 21.7)                 | 16.9 (11.7 to 23.5)       | 13.6 (9 to 19.9)          | 30.4 (21 to 43.3)         | 29.2 (20 to 41.2)         | 31.8 (21.1 to 46.8)       | 99.2 (77.3 to 125.2)    | 72.6 (50.1 to 100)   | 134 (97.4 to 179.3)  |

| Cause | Location  | Measure    | Age-standardized rate (per 100,000) |                           |                           |                           |                           |                           | % Change (1990 to 2019) |                       |                        |
|-------|-----------|------------|-------------------------------------|---------------------------|---------------------------|---------------------------|---------------------------|---------------------------|-------------------------|-----------------------|------------------------|
|       |           |            | 1990                                |                           |                           | 2019                      |                           |                           |                         |                       |                        |
|       |           |            | Both                                | Female                    | Male                      | Both                      | Female                    | Male                      | Both                    | Female                | Male                   |
|       | Oman      | Incidence  | 31.3 (27.6 to 35.3)                 | 33.1 (28.9 to 37.8)       | 30.2 (26.2 to 34.5)       | 63.3 (56.6 to 70.9)       | 59.6 (52.8 to 67.2)       | 66.7 (58.8 to 75.2)       | 102.1 (90 to 114)       | 80.2 (67.8 to 94.6)   | 121.1 (104.1 to 137.4) |
|       |           | Prevalence | 1352 (1231.5 to 1474.9)             | 1448.4 (1301.3 to 1602.3) | 1299.3 (1180.7 to 1428.3) | 1790.8 (1645.5 to 1934.3) | 1814.8 (1652.7 to 1984.1) | 1805.3 (1655.1 to 1962.6) | 32.4 (27.3 to 38.1)     | 25.3 (18.6 to 32.4)   | 38.9 (32.2 to 46.6)    |
|       |           | Deaths     | 5.5 (4 to 7.6)                      | 5.3 (3.7 to 7.3)          | 6.3 (4.4 to 9.2)          | 6.8 (5.2 to 8.5)          | 6.5 (4.7 to 8.5)          | 7.4 (5.5 to 9.7)          | 22.1 (-14.1 to 68.4)    | 23.9 (-16.3 to 74.5)  | 17.3 (-25.1 to 75.3)   |
|       |           | DALYs      | 120.2 (90 to 160)                   | 121.3 (89.8 to 161.1)     | 124 (89.3 to 177.7)       | 142.4 (115.4 to 171.5)    | 145.4 (115.2 to 179.3)    | 144.3 (113.6 to 177)      | 18.5 (-9.7 to 53.9)     | 19.9 (-10.9 to 58.8)  | 16.4 (-19.2 to 63.6)   |
|       |           | YLLs       | 100.9 (71.4 to 140.5)               | 99.9 (69.7 to 138.3)      | 106.6 (72.4 to 157.5)     | 106.9 (82.3 to 132.8)     | 109.9 (80.8 to 142.1)     | 108.3 (81.3 to 139.9)     | 5.9 (-23.7 to 45.9)     | 10.1 (-23.5 to 57.2)  | 1.6 (-32.9 to 54.4)    |
|       |           | YLDs       | 19.3 (13.7 to 26.4)                 | 21.5 (15 to 29.7)         | 17.4 (11.9 to 24.6)       | 35.5 (24.5 to 49.7)       | 35.5 (24.7 to 49.3)       | 36 (23.6 to 52.1)         | 84.6 (64.3 to 107.6)    | 65.5 (44.3 to 90.7)   | 106.9 (76.3 to 144.1)  |
|       | Palestine | Incidence  | 41.1 (36 to 45.9)                   | 41.8 (36.3 to 47.4)       | 40.2 (35.1 to 45.6)       | 65.9 (58.6 to 73.7)       | 61.2 (54.2 to 69.2)       | 71.2 (62.5 to 80.5)       | 60.5 (52.7 to 69.6)     | 46.6 (36.6 to 57.7)   | 77.4 (63 to 91.6)      |
|       |           | Prevalence | 1514.6 (1379.5 to 1661.5)           | 1574.8 (1426.9 to 1736.9) | 1444.2 (1312.2 to 1583.4) | 1827.4 (1671.1 to 1987.6) | 1807.9 (1647.6 to 1979.8) | 1863.4 (1695.1 to 2032)   | 20.6 (16 to 25.7)       | 14.8 (9.3 to 20.5)    | 29 (22.2 to 36.1)      |
|       |           | Deaths     | 14.5 (10.6 to 19.5)                 | 13.4 (9.6 to 18)          | 16.1 (11.6 to 22)         | 10.9 (8.6 to 13.7)        | 10 (7.7 to 12.6)          | 12.6 (9.6 to 15.9)        | -24.7 (-42.5 to -2.8)   | -25.4 (-43.7 to 0.8)  | -21.5 (-42.3 to 4.3)   |
|       |           | DALYs      | 303.1 (224.6 to 402.2)              | 289.7 (208.2 to 384.2)    | 321.1 (233.1 to 429.8)    | 233.2 (186.4 to 286.1)    | 217.7 (172.9 to 270)      | 255.3 (200.8 to 313.8)    | -23.1 (-40.4 to -1.2)   | -24.9 (-42.7 to -1.2) | -20.5 (-40.4 to 4.4)   |
|       |           | YLLs       | 281.2 (204.3 to 377.3)              | 266.4 (187.4 to 362)      | 300.7 (213.9 to 410.1)    | 200.8 (156.1 to 251.5)    | 187.2 (144.2 to 238.5)    | 220.5 (168.2 to 280.5)    | -28.6 (-46 to -5.7)     | -29.7 (-47.8 to -4.1) | -26.7 (-46 to -1.3)    |
|       |           | YLDs       | 21.9 (15.3 to 30.5)                 | 23.3 (16.2 to 32.4)       | 20.4 (13.9 to 29)         | 32.4 (22.6 to 45.7)       | 30.4 (20.8 to 42.7)       | 34.8 (23.6 to 51.6)       | 47.6 (31.5 to 65.7)     | 30.9 (12.3 to 51.4)   | 70.2 (44.1 to 101.7)   |

| Cause | Location     | Measure    | Age-standardized rate (per 100,000) |                           |                           |                           |                           |                           | % Change (1990 to 2019) |                      |                       |
|-------|--------------|------------|-------------------------------------|---------------------------|---------------------------|---------------------------|---------------------------|---------------------------|-------------------------|----------------------|-----------------------|
|       |              |            | 1990                                |                           |                           | 2019                      |                           |                           |                         |                      |                       |
|       |              |            | Both                                | Female                    | Male                      | Both                      | Female                    | Male                      | Both                    | Female               | Male                  |
|       | Qatar        | Incidence  | 46.6 (41.4 to 52.7)                 | 54.1 (47.2 to 61.4)       | 44.1 (38.6 to 50.8)       | 77.2 (69 to 86.2)         | 71.7 (63.7 to 80)         | 79.4 (70.3 to 89.3)       | 65.5 (56.6 to 75.2)     | 32.5 (23.8 to 41.6)  | 80.1 (68.6 to 92.1)   |
|       |              | Prevalence | 1604.7 (1463.9 to 1758.8)           | 1794.5 (1625.8 to 1978.6) | 1517.5 (1370.9 to 1674.1) | 1995.4 (1831.9 to 2172.6) | 2026.4 (1843.7 to 2208.1) | 1989.7 (1816.2 to 2176.6) | 24.3 (19.1 to 29.8)     | 12.9 (7.4 to 18)     | 31.1 (24.5 to 37.6)   |
|       |              | Deaths     | 16.9 (12.4 to 29)                   | 19.4 (13.2 to 37.8)       | 15.6 (10.9 to 24.8)       | 15.8 (12 to 20.9)         | 24.2 (17.6 to 32)         | 13.1 (9.5 to 17.7)        | -6.5 (-41.4 to 27.2)    | 25 (-34.9 to 80.1)   | -16.5 (-44.1 to 18.6) |
|       |              | DALYs      | 303.4 (228.4 to 485.6)              | 367.7 (261.1 to 674.3)    | 270 (194.5 to 396.7)      | 256.9 (199.9 to 333.8)    | 380.9 (289.4 to 495.7)    | 215 (162.2 to 281.5)      | -15.3 (-43.4 to 12.8)   | 3.6 (-41 to 46.3)    | -20.4 (-43.7 to 10.4) |
|       |              | YLLs       | 278.5 (202.7 to 456)                | 338.5 (233.2 to 645.4)    | 247.4 (173.9 to 375.9)    | 218.4 (164.8 to 290.8)    | 344.5 (252.3 to 457.5)    | 175.6 (127.1 to 238.3)    | -21.6 (-48 to 7.3)      | 1.8 (-44.1 to 47.7)  | -29 (-51.5 to 1.7)    |
|       |              | YLDs       | 24.9 (17.3 to 35.4)                 | 29.2 (20.2 to 40.7)       | 22.6 (15.3 to 32.9)       | 38.5 (25.8 to 55.6)       | 36.4 (25.3 to 50.9)       | 39.5 (25.4 to 58.6)       | 54.9 (33.8 to 76.4)     | 24.6 (7 to 44.5)     | 74.4 (47.1 to 104.5)  |
|       | Saudi Arabia | Incidence  | 42.2 (37.4 to 47.8)                 | 45.5 (40 to 51.8)         | 40.2 (35.3 to 45.6)       | 78.4 (70.9 to 86.3)       | 71.3 (63.7 to 80.1)       | 83 (73.8 to 92.3)         | 85.5 (73.7 to 97.4)     | 56.7 (44.3 to 69.5)  | 106.4 (91.4 to 123.2) |
|       |              | Prevalence | 1514 (1385 to 1660.7)               | 1633.7 (1479.5 to 1806.5) | 1436.9 (1303.2 to 1575.5) | 2068.4 (1912.4 to 2240.2) | 2064.1 (1887.9 to 2261.1) | 2075.1 (1907.8 to 2259.6) | 36.6 (30.6 to 43.5)     | 26.3 (19.2 to 34.4)  | 44.4 (36.4 to 52.4)   |
|       |              | Deaths     | 15.1 (11 to 20.4)                   | 13.5 (9.9 to 18.4)        | 16.8 (11.7 to 23)         | 16.6 (12.1 to 21.7)       | 16.6 (11.6 to 22.9)       | 16.7 (12 to 22.8)         | 9.3 (-23.4 to 51)       | 22.6 (-18.9 to 71.5) | -0.6 (-35.4 to 48.4)  |
|       |              | DALYs      | 324.3 (236.1 to 439.5)              | 306.8 (224.1 to 413.6)    | 341.5 (240.6 to 469.7)    | 349.6 (261.7 to 456.8)    | 360.6 (264 to 487.9)      | 343.3 (251.9 to 451.6)    | 7.8 (-23.2 to 45.8)     | 17.5 (-20 to 63.2)   | 0.5 (-32.8 to 46.1)   |
|       |              | YLLs       | 301.2 (212.2 to 414)                | 280.9 (198.4 to 389.4)    | 320.3 (218.5 to 449.3)    | 310 (225 to 415.3)        | 322.8 (225.6 to 446.9)    | 302.4 (214 to 414.5)      | 2.9 (-29.5 to 43.4)     | 14.9 (-26.2 to 64)   | -5.6 (-38.7 to 42.4)  |
|       |              | YLDs       | 23.1 (16.5 to 32.1)                 | 25.9 (18.3 to 35.8)       | 21.2 (14.2 to 30.5)       | 39.7 (27.1 to 56.4)       | 37.8 (25.9 to 52.8)       | 40.9 (27 to 60.3)         | 71.6 (51.9 to 95.5)     | 46.1 (24.9 to 72.4)  | 92.7 (64.7 to 123.4)  |

| Cause | Location             | Measure    | Age-standardized rate (per 100,000) |                           |                           |                           |                           |                           | % Change (1990 to 2019) |                       |                       |
|-------|----------------------|------------|-------------------------------------|---------------------------|---------------------------|---------------------------|---------------------------|---------------------------|-------------------------|-----------------------|-----------------------|
|       |                      |            | 1990                                |                           |                           | 2019                      |                           |                           |                         |                       |                       |
|       |                      |            | Both                                | Female                    | Male                      | Both                      | Female                    | Male                      | Both                    | Female                | Male                  |
|       | Sudan                | Incidence  | 28.2 (24.9 to 31.9)                 | 30.2 (26.2 to 34.8)       | 26.5 (23.2 to 30.3)       | 52 (45.9 to 58.8)         | 49.9 (43.5 to 56.3)       | 53.8 (46.7 to 62)         | 84.5 (75.7 to 93)       | 65.3 (55.8 to 74.5)   | 103.1 (89.7 to 116.6) |
|       |                      | Prevalence | 1307 (1182.5 to 1437.7)             | 1382.2 (1236.4 to 1539.9) | 1232.2 (1102.4 to 1365.5) | 1618.8 (1482.4 to 1761.4) | 1634.2 (1480.8 to 1791.2) | 1596.6 (1446.6 to 1754.2) | 23.9 (18.9 to 29)       | 18.2 (12.6 to 23.6)   | 29.6 (23.4 to 36.5)   |
|       |                      | Deaths     | 7.5 (5 to 11.2)                     | 7 (4.4 to 11.1)           | 8.1 (5.4 to 13.2)         | 8 (5.1 to 12.6)           | 7.7 (4.8 to 11.5)         | 8.4 (4.8 to 15.3)         | 6.8 (-29.4 to 60.7)     | 10.4 (-35.3 to 58.1)  | 2.8 (-32.8 to 76.2)   |
|       |                      | DALYs      | 167.3 (115.9 to 236.8)              | 163.2 (106.6 to 244.5)    | 171.4 (116.7 to 262.4)    | 178 (120.4 to 262.2)      | 175.5 (116.9 to 250)      | 180 (110.1 to 299.1)      | 6.4 (-27 to 52.3)       | 7.5 (-33 to 51.1)     | 5 (-29.2 to 71.4)     |
|       |                      | YLLs       | 152.7 (101.4 to 221.7)              | 146.9 (92 to 226.5)       | 158.5 (104.2 to 247.5)    | 152.8 (95.3 to 237.4)     | 150.6 (92.1 to 221.2)     | 154.5 (87.4 to 273.2)     | 0 (-34.7 to 50.4)       | 2.6 (-40.8 to 49.7)   | -2.5 (-38.8 to 69)    |
|       |                      | YLDs       | 14.6 (10 to 20.6)                   | 16.4 (11.4 to 22.8)       | 13 (8.5 to 18.6)          | 25.3 (17.3 to 35.5)       | 24.8 (17.4 to 34.8)       | 25.5 (16.6 to 37.9)       | 72.8 (53 to 94.7)       | 51.8 (30.3 to 76.2)   | 96.2 (63.7 to 131.8)  |
|       | Syrian Arab Republic | Incidence  | 36.8 (32.4 to 42)                   | 41.1 (35.8 to 46.9)       | 33 (28.7 to 38)           | 60.5 (54.5 to 67.8)       | 59.8 (53.1 to 67.1)       | 60.9 (54 to 69.5)         | 64.3 (52.6 to 75.5)     | 45.6 (35.5 to 57.1)   | 84.5 (65.8 to 103.5)  |
|       |                      | Prevalence | 1455.2 (1334.5 to 1597.1)           | 1560.5 (1415.6 to 1741.4) | 1356.7 (1236.7 to 1503.8) | 1736.3 (1605.8 to 1896.4) | 1763.7 (1614.6 to 1940.1) | 1703.3 (1562.5 to 1871.5) | 19.3 (13.9 to 24.7)     | 13 (7.4 to 18.8)      | 25.5 (18.5 to 33.1)   |
|       |                      | Deaths     | 10.3 (7.6 to 13.7)                  | 10.2 (7.4 to 13.7)        | 10.5 (7.4 to 14.6)        | 8 (5.7 to 10.7)           | 8.8 (6.2 to 11.8)         | 7.5 (5.2 to 10.4)         | -22.7 (-45.7 to 6.3)    | -13.6 (-40.1 to 17.3) | -27.9 (-54.2 to 6.4)  |
|       |                      | DALYs      | 223.4 (167 to 292)                  | 221.2 (164.2 to 290.1)    | 225.2 (161.7 to 303.3)    | 172 (126.9 to 227.5)      | 179.1 (129.9 to 237.8)    | 167.7 (120.7 to 226)      | -23 (-44 to 4)          | -19 (-40.9 to 9.1)    | -25.5 (-49 to 7.6)    |
|       |                      | YLLs       | 203.5 (147.6 to 270)                | 198.6 (143.6 to 265.7)    | 207.7 (143.7 to 284)      | 143.7 (100 to 198.3)      | 151 (104.8 to 208.5)      | 139.5 (96.1 to 194.2)     | -29.4 (-51.1 to -0.3)   | -24 (-48 to 7.3)      | -32.9 (-56.8 to 1.1)  |
|       |                      | YLDs       | 20 (14.1 to 27.7)                   | 22.6 (15.9 to 31.4)       | 17.5 (12 to 25.2)         | 28.2 (19.5 to 40.2)       | 28.1 (19.3 to 39.6)       | 28.3 (18.7 to 41.4)       | 41.5 (24.6 to 61.3)     | 24.2 (5.6 to 43.1)    | 61.4 (34.8 to 94.5)   |

| Cause | Location | Measure    | Age-standardized rate (per 100,000) |                           |                           |                           |                           |                         | % Change (1990 to 2019) |                       |                        |
|-------|----------|------------|-------------------------------------|---------------------------|---------------------------|---------------------------|---------------------------|-------------------------|-------------------------|-----------------------|------------------------|
|       |          |            | 1990                                |                           |                           | 2019                      |                           |                         |                         |                       |                        |
|       |          |            | Both                                | Female                    | Male                      | Both                      | Female                    | Male                    | Both                    | Female                | Male                   |
|       | Tunisia  | Incidence  | 35.6 (31.4 to 40.4)                 | 37.9 (32.8 to 43.5)       | 33.5 (29.3 to 38.2)       | 63.2 (56.1 to 70.8)       | 60.3 (52.9 to 68.1)       | 66.4 (58.8 to 74.9)     | 77.7 (68.6 to 86.9)     | 59.3 (48.8 to 70.5)   | 98.1 (84.5 to 112.7)   |
|       |          | Prevalence | 1408.1 (1277.1 to 1538.3)           | 1486.7 (1335.6 to 1642.7) | 1330 (1194.2 to 1468.7)   | 1762.1 (1605.5 to 1918.4) | 1767 (1604.4 to 1931.4)   | 1760.2 (1594.8 to 1921) | 25.1 (20.1 to 30.2)     | 18.9 (12.8 to 25)     | 32.3 (26.1 to 39.2)    |
|       |          | Deaths     | 6.4 (4.7 to 8.5)                    | 6.1 (4.5 to 8.7)          | 6.7 (4.7 to 9.2)          | 6.4 (4.3 to 9.2)          | 6.2 (4 to 9.1)            | 6.7 (4.3 to 10)         | 0.5 (-31.5 to 37.8)     | 1.5 (-32.7 to 40)     | -0.8 (-36.7 to 43.9)   |
|       |          | DALYs      | 133.8 (101.8 to 172.1)              | 133 (100.7 to 179.5)      | 135.1 (98.9 to 177.5)     | 140.8 (101.8 to 189.1)    | 136.9 (96.2 to 186)       | 145.3 (102.3 to 205.3)  | 5.2 (-23.3 to 40.1)     | 2.9 (-26.1 to 37)     | 7.6 (-25.8 to 50.3)    |
|       |          | YLLs       | 115.9 (85 to 153.1)                 | 114.4 (83 to 163.2)       | 118 (82.7 to 160.8)       | 112.2 (74.5 to 157.6)     | 110.5 (69.9 to 159.2)     | 114.5 (73.1 to 171)     | -3.2 (-35.4 to 36.6)    | -3.4 (-37.2 to 36.1)  | -3 (-38.6 to 44)       |
|       |          | YLDs       | 17.9 (12.4 to 25)                   | 18.6 (12.7 to 25.6)       | 17.1 (11.6 to 24.7)       | 28.5 (19.3 to 40.5)       | 26.4 (18 to 36.2)         | 30.9 (20.1 to 45.5)     | 59.6 (41 to 82)         | 41.9 (22.7 to 65.9)   | 80 (53.1 to 114.7)     |
|       | Turkey   | Incidence  | 30.8 (27.8 to 34.4)                 | 30 (26.8 to 33.9)         | 31.7 (28.5 to 35.4)       | 59.8 (53.4 to 66.8)       | 55.4 (49.2 to 62.6)       | 64.9 (57 to 73.4)       | 94.1 (78.5 to 110.5)    | 84.6 (68.8 to 102.8)  | 104.3 (85.5 to 126.9)  |
|       |          | Prevalence | 1330.9 (1221.6 to 1460.6)           | 1369.4 (1242.2 to 1521.8) | 1297.4 (1179.2 to 1426.8) | 1670.5 (1539.1 to 1817.4) | 1644.7 (1501.9 to 1804.6) | 1710.5 (1560.4 to 1873) | 25.5 (18.8 to 32.9)     | 20.1 (12.9 to 28)     | 31.8 (23.4 to 40.7)    |
|       |          | Deaths     | 11.4 (8.4 to 16.8)                  | 9.7 (7.1 to 15.5)         | 13.4 (9.2 to 20.8)        | 7.6 (5.7 to 9.8)          | 7.2 (5.3 to 9.5)          | 8 (5.9 to 10.5)         | -33.5 (-57.4 to -9.5)   | -26 (-55.3 to 2.5)    | -40.3 (-63.6 to -10.9) |
|       |          | DALYs      | 234.7 (176.4 to 324.6)              | 205 (155.2 to 306.7)      | 269 (189.8 to 389.1)      | 159.3 (124.4 to 201.1)    | 148.8 (115.6 to 188.7)    | 171.1 (130.7 to 218.5)  | -32.1 (-53.2 to -11.1)  | -27.4 (-52.4 to -2.8) | -36.4 (-58.5 to -10.3) |
|       |          | YLLs       | 217 (160.5 to 307.1)                | 187.3 (137.2 to 286.1)    | 251.2 (173.7 to 374.9)    | 130.8 (98.6 to 170.8)     | 122.7 (89.9 to 161.3)     | 139.7 (101.5 to 184.7)  | -39.7 (-60.2 to -18.4)  | -34.5 (-58.8 to -9.2) | -44.4 (-65.3 to -17.6) |
|       |          | YLDs       | 17.7 (12.6 to 23.9)                 | 17.7 (12.5 to 24.2)       | 17.8 (12.4 to 24.6)       | 28.5 (19.3 to 40.7)       | 26.1 (17.9 to 36.7)       | 31.4 (20.6 to 45.2)     | 61.1 (41 to 85.2)       | 47.5 (25.4 to 75.9)   | 76.7 (47.2 to 110.8)   |

| Cause | Location             | Measure    | Age-standardized rate (per 100,000) |                           |                           |                           |                           |                           | % Change (1990 to 2019) |                       |                       |
|-------|----------------------|------------|-------------------------------------|---------------------------|---------------------------|---------------------------|---------------------------|---------------------------|-------------------------|-----------------------|-----------------------|
|       |                      |            | 1990                                |                           |                           | 2019                      |                           |                           |                         |                       |                       |
|       |                      |            | Both                                | Female                    | Male                      | Both                      | Female                    | Male                      | Both                    | Female                | Male                  |
|       | United Arab Emirates | Incidence  | 49 (43.3 to 54.9)                   | 52.7 (46.2 to 59.8)       | 47 (41.1 to 53.1)         | 75.4 (67.5 to 83.4)       | 72.6 (64.9 to 80.8)       | 77.3 (68.6 to 86.5)       | 53.9 (46.5 to 61.2)     | 37.7 (30.1 to 45.4)   | 64.6 (54.6 to 74.8)   |
|       |                      | Prevalence | 1632.2 (1483.8 to 1784.2)           | 1778.1 (1606.5 to 1964.1) | 1567.7 (1429.3 to 1721.4) | 1966 (1805.7 to 2145.5)   | 2012.6 (1849.4 to 2196.8) | 1962.4 (1782.5 to 2156.4) | 20.5 (15.8 to 25.3)     | 13.2 (8.4 to 17.9)    | 25.2 (19.3 to 31.4)   |
|       |                      | Deaths     | 20.4 (12.3 to 27)                   | 20.9 (11.6 to 29.9)       | 20.2 (11.9 to 28.1)       | 15.9 (9.3 to 25.5)        | 17.1 (8.6 to 24.5)        | 15.4 (8.9 to 28)          | -22.1 (-47.4 to 10.7)   | -17.9 (-52 to 18.6)   | -24 (-49.3 to 20.1)   |
|       |                      | DALYs      | 412 (272.4 to 528.9)                | 427.7 (259.4 to 603.8)    | 405.2 (253.1 to 559.8)    | 337.7 (215.6 to 525)      | 360.1 (204.1 to 505.4)    | 329.3 (207.2 to 570.5)    | -18 (-43.2 to 15.5)     | -15.8 (-49.4 to 21.1) | -18.7 (-44.5 to 24.3) |
|       |                      | YLLs       | 385.7 (243.9 to 507)                | 398.6 (230.2 to 574.8)    | 380.4 (229.9 to 537.5)    | 298.9 (178.3 to 488.2)    | 322.7 (157.2 to 472)      | 289.7 (167.3 to 527.7)    | -22.5 (-49 to 12.8)     | -19 (-54.3 to 20.3)   | -23.8 (-50.8 to 21.2) |
|       |                      | YLDs       | 26.3 (18 to 37.7)                   | 29.1 (20.2 to 40.8)       | 24.8 (16.1 to 36.5)       | 38.8 (25.5 to 55.8)       | 37.4 (25.7 to 53)         | 39.6 (24.9 to 58)         | 47.3 (30.2 to 65.8)     | 28.4 (11.4 to 48.4)   | 59.8 (36.8 to 86.8)   |
|       | Yemen                | Incidence  | 27.3 (24 to 31.1)                   | 28.3 (24.6 to 32.9)       | 26.3 (22.7 to 30.2)       | 47 (41.1 to 54.2)         | 45.4 (38.5 to 54.1)       | 48.6 (41.8 to 56.2)       | 72.2 (61.6 to 86.7)     | 60.3 (44.7 to 86.4)   | 84.9 (72.5 to 96.3)   |
|       |                      | Prevalence | 1242.7 (1127.8 to 1364.5)           | 1304.8 (1173.5 to 1453)   | 1182.9 (1073.1 to 1301.5) | 1483.5 (1351.3 to 1623.3) | 1505.4 (1356.4 to 1671.5) | 1462.5 (1327.7 to 1606.7) | 19.4 (14.3 to 25.4)     | 15.4 (8.6 to 24.7)    | 23.6 (17.5 to 29.7)   |
|       |                      | Deaths     | 7.2 (4.9 to 10.7)                   | 6.3 (4.1 to 10.7)         | 8.7 (5.7 to 13.4)         | 6.9 (4.8 to 9.4)          | 6.2 (4.2 to 9)            | 7.7 (5.2 to 11.1)         | -4.5 (-28.1 to 27.5)    | -3 (-31.6 to 33.1)    | -11.5 (-34.7 to 22.8) |
|       |                      | DALYs      | 163.6 (113.2 to 239.4)              | 150.2 (102.1 to 240.5)    | 183.2 (124.5 to 268.2)    | 157.2 (113.5 to 211.4)    | 147.4 (106.2 to 206.2)    | 167.8 (116.7 to 231.3)    | -3.9 (-26.4 to 27.7)    | -1.9 (-29.4 to 32.7)  | -8.4 (-32.4 to 26)    |
|       |                      | YLLs       | 148.6 (99.8 to 222.8)               | 134 (86.1 to 225.4)       | 169.7 (111.5 to 254.2)    | 134 (91.3 to 188)         | 123.8 (83 to 180.3)       | 144.9 (96.3 to 207.8)     | -9.9 (-33.5 to 23.7)    | -7.6 (-35.2 to 30.9)  | -14.7 (-39.2 to 20.6) |
|       |                      | YLDs       | 14.9 (10.6 to 20.7)                 | 16.3 (11.5 to 22.4)       | 13.5 (9.2 to 19.1)        | 23.2 (16.1 to 33)         | 23.6 (16.3 to 33.8)       | 23 (15.1 to 33.7)         | 55.7 (36.5 to 76.7)     | 44.9 (20.8 to 75.8)   | 70.3 (45.6 to 98.5)   |

| Cause                                      | Location                     | Measure    | Age-standardized rate (per 100,000) |                        |                        |                        |                        |                        | % Change (1990 to 2019) |                       |                       |
|--------------------------------------------|------------------------------|------------|-------------------------------------|------------------------|------------------------|------------------------|------------------------|------------------------|-------------------------|-----------------------|-----------------------|
|                                            |                              |            | 1990                                |                        |                        | 2019                   |                        |                        |                         |                       |                       |
|                                            |                              |            | Both                                | Female                 | Male                   | Both                   | Female                 | Male                   | Both                    | Female                | Male                  |
| Chronic kidney disease due to hypertension | North Africa and Middle East | Incidence  | 21.1 (19.2 to 23.1)                 | 21.8 (19.8 to 24)      | 20.5 (18.7 to 22.4)    | 36.6 (33.6 to 39.6)    | 34.4 (31.7 to 37.1)    | 38.7 (35.6 to 42.1)    | 73 (68.4 to 77.7)       | 57.2 (52.2 to 62.8)   | 89.1 (84 to 94.5)     |
|                                            |                              | Prevalence | 406.7 (374.5 to 443.7)              | 424.1 (388.1 to 465.1) | 389.2 (358.3 to 422.6) | 698.8 (643.8 to 756.9) | 670.4 (617.2 to 726)   | 727.6 (667.4 to 791)   | 71.8 (67.9 to 76)       | 58.1 (53.5 to 62.7)   | 87 (82.1 to 92.2)     |
|                                            |                              | Deaths     | 11.9 (9.6 to 15.9)                  | 10.6 (8.4 to 15.3)     | 13.5 (10.6 to 18.3)    | 10.6 (8.5 to 12.8)     | 10 (7.9 to 12.4)       | 11.2 (9 to 14.1)       | -11.3 (-29.5 to 6.3)    | -5.7 (-32.3 to 13)    | -17 (-36.6 to 6.8)    |
|                                            |                              | DALYs      | 222.4 (183.4 to 282.6)              | 203.6 (163.5 to 271.3) | 242.6 (197.8 to 311.6) | 203.3 (165.8 to 243)   | 192.3 (154.2 to 238.2) | 214.1 (173.9 to 265.3) | -8.6 (-24.8 to 7.6)     | -5.6 (-27.9 to 12.4)  | -11.7 (-30.7 to 11)   |
|                                            |                              | YLLs       | 204.6 (166.6 to 264.8)              | 185.7 (146.3 to 252.8) | 224.9 (179.6 to 296.2) | 174.6 (139 to 215.2)   | 166.4 (130.4 to 210.1) | 182.6 (144.3 to 233.2) | -14.7 (-31 to 2.5)      | -10.4 (-33.2 to 8.6)  | -18.8 (-37.4 to 4.8)  |
|                                            |                              | YLDs       | 17.8 (12.9 to 23.7)                 | 17.9 (13.1 to 23.9)    | 17.7 (12.3 to 23.9)    | 28.7 (20.6 to 38.7)    | 25.9 (18.6 to 34.2)    | 31.6 (21.8 to 43.6)    | 61.4 (53.2 to 70)       | 44.6 (36.4 to 53.3)   | 78.1 (66.2 to 89.6)   |
|                                            | Afghanistan                  | Incidence  | 19.4 (17.1 to 21.9)                 | 20.1 (17.4 to 23.1)    | 18.8 (16.4 to 21.3)    | 31.4 (27.7 to 35.4)    | 29.6 (25.6 to 34)      | 33.3 (29.1 to 37.7)    | 61.3 (54.8 to 68.7)     | 47.4 (39.9 to 57.2)   | 77 (68.2 to 86.9)     |
|                                            |                              | Prevalence | 359.2 (320.9 to 403)                | 386.8 (342.6 to 436.6) | 331.7 (292.6 to 372)   | 580.1 (519.5 to 650.4) | 572.1 (507.2 to 650.1) | 590.2 (520.7 to 661.8) | 61.5 (55.2 to 68.6)     | 47.9 (40.9 to 56.2)   | 77.9 (68 to 88.1)     |
|                                            |                              | Deaths     | 18.3 (12.6 to 28.8)                 | 16 (10.7 to 28.3)      | 20.3 (13.5 to 32.6)    | 16.4 (11.5 to 26.1)    | 15.2 (10 to 25.8)      | 17.6 (11.3 to 28.7)    | -10.3 (-32.6 to 15.1)   | -5 (-38.9 to 34.3)    | -13.6 (-34.2 to 9)    |
|                                            |                              | DALYs      | 365.5 (256.1 to 525.7)              | 343.7 (237 to 536)     | 381.6 (259.4 to 569.1) | 322.5 (231.9 to 469.8) | 315.3 (216.5 to 503)   | 330.3 (222.2 to 506.6) | -11.8 (-34.8 to 15.5)   | -8.3 (-39.4 to 29.2)  | -13.4 (-35.2 to 11.2) |
|                                            |                              | YLLs       | 348.2 (239.8 to 510.4)              | 325.1 (219.9 to 519.8) | 365.9 (244.2 to 556.6) | 295.7 (207.1 to 442.9) | 288.7 (188.7 to 479.1) | 302.9 (197.6 to 478.3) | -15.1 (-37.7 to 12.8)   | -11.2 (-43.3 to 28.6) | -17.2 (-38.9 to 8.1)  |
|                                            |                              | YLDs       | 17.3 (12.2 to 23.8)                 | 18.6 (12.9 to 26)      | 15.7 (10.6 to 22.1)    | 26.8 (19 to 36.9)      | 26.6 (18.7 to 36.7)    | 27.4 (18.4 to 39.6)    | 54.5 (37.1 to 73.5)     | 42.7 (21.9 to 66.7)   | 74.4 (47.6 to 106.6)  |

| Cause | Location | Measure    | Age-standardized rate (per 100,000) |                        |                        |                        |                        |                        | % Change (1990 to 2019) |                       |                       |
|-------|----------|------------|-------------------------------------|------------------------|------------------------|------------------------|------------------------|------------------------|-------------------------|-----------------------|-----------------------|
|       |          |            | 1990                                |                        |                        | 2019                   |                        |                        |                         |                       |                       |
|       |          |            | Both                                | Female                 | Male                   | Both                   | Female                 | Male                   | Both                    | Female                | Male                  |
|       | Algeria  | Incidence  | 21.9 (19.5 to 24.6)                 | 23.1 (20.2 to 26.4)    | 20.5 (18 to 23.2)      | 37.1 (33.3 to 41.2)    | 35.2 (31.3 to 39.4)    | 38.8 (34.1 to 43.5)    | 69.4 (62.5 to 76.8)     | 52.2 (44.5 to 60.8)   | 89.7 (79 to 101.8)    |
|       |          | Prevalence | 416.5 (372.9 to 466.9)              | 449.6 (395.2 to 513.5) | 385.3 (340.4 to 436.5) | 711.5 (639.5 to 789.5) | 695.3 (618.1 to 782.1) | 722.9 (639.5 to 807.3) | 70.8 (63.6 to 78)       | 54.6 (47.1 to 63.1)   | 87.6 (76.3 to 99.4)   |
|       |          | Deaths     | 14.1 (10.2 to 19.8)                 | 13.8 (9.1 to 23.2)     | 14.3 (10.4 to 19)      | 11.6 (8.5 to 15.4)     | 13.2 (9.1 to 18.9)     | 10.6 (7.8 to 14.6)     | -17.3 (-36.2 to 8.3)    | -4.9 (-29.7 to 28.9)  | -25.3 (-45.2 to 5.4)  |
|       |          | DALYs      | 231.7 (169.3 to 325.6)              | 230.7 (156.5 to 373.2) | 232.8 (172.3 to 313.1) | 195.5 (148.1 to 254.4) | 210.5 (153.4 to 291.8) | 184.7 (139.2 to 246.7) | -15.6 (-35.1 to 8.7)    | -8.8 (-32.1 to 22.9)  | -20.7 (-40.8 to 8.5)  |
|       |          | YLLs       | 214.1 (152.1 to 308.5)              | 212.2 (138.2 to 354.8) | 216 (157.4 to 296.3)   | 166.3 (121.1 to 226.2) | 183.3 (126.4 to 264.5) | 153.7 (109.3 to 215.4) | -22.3 (-41.4 to 3.2)    | -13.6 (-37.9 to 19.7) | -28.9 (-49.2 to 0.8)  |
|       |          | YLDs       | 17.7 (12.2 to 24.8)                 | 18.5 (12.7 to 26.3)    | 16.8 (11.4 to 23.5)    | 29.2 (19.9 to 41.6)    | 27.2 (18.3 to 38.4)    | 31 (20.5 to 45.4)      | 65.5 (46.9 to 84.6)     | 46.8 (25.2 to 70.6)   | 84.4 (54.6 to 114.9)  |
|       | Bahrain  | Incidence  | 25.5 (22.9 to 28.4)                 | 26.4 (23.4 to 29.7)    | 25.1 (22.2 to 28.2)    | 42.4 (38.3 to 46.8)    | 38.1 (34.3 to 42.3)    | 45.8 (40.8 to 51.4)    | 66.4 (58 to 74.9)       | 44.4 (36.7 to 52.9)   | 82.3 (70.9 to 94.3)   |
|       |          | Prevalence | 472.5 (426.7 to 527.1)              | 500.2 (445 to 560.3)   | 449.3 (396.7 to 504)   | 806.5 (726.9 to 889.9) | 750.4 (672.4 to 831.9) | 859.6 (764.3 to 959.3) | 70.7 (62.5 to 78.8)     | 50 (41.6 to 58.8)     | 91.3 (79.3 to 102.8)  |
|       |          | Deaths     | 13.5 (10.4 to 17.2)                 | 12.7 (9.3 to 16.5)     | 14.7 (10.6 to 20.4)    | 12.6 (9.6 to 16)       | 11.7 (8.6 to 15.3)     | 13.5 (10 to 17.9)      | -6.5 (-27.2 to 18.6)    | -7.7 (-32.3 to 23.9)  | -7.8 (-30.5 to 21.5)  |
|       |          | DALYs      | 227.7 (180.4 to 287.4)              | 222.7 (166.5 to 287.1) | 237.6 (181 to 322.4)   | 208.8 (164.2 to 258.8) | 193.5 (147.4 to 246.2) | 223.5 (171.7 to 285.8) | -8.3 (-26.8 to 13.2)    | -13.1 (-35 to 14.1)   | -5.9 (-27.5 to 22)    |
|       |          | YLLs       | 207.5 (160.2 to 266.2)              | 202.3 (147.3 to 268.6) | 217.3 (159.3 to 303.7) | 174.5 (132.2 to 224.7) | 164.4 (118.9 to 216.3) | 184.9 (136.3 to 246.2) | -15.9 (-34.5 to 8)      | -18.7 (-41.6 to 10.7) | -14.9 (-36.7 to 14.2) |
|       |          | YLDs       | 20.2 (14.3 to 28)                   | 20.4 (14 to 28)        | 20.3 (14 to 28.8)      | 34.3 (23.6 to 48.3)    | 29.1 (20 to 40.8)      | 38.6 (25.8 to 55.6)    | 70.2 (51 to 92.1)       | 42.5 (21.8 to 64.2)   | 90.1 (63.2 to 122.2)  |



| Cause | Location                   | Measure    | Age-standardized rate (per 100,000) |                        |                        |                        |                        |                        | % Change (1990 to 2019) |                      |                       |
|-------|----------------------------|------------|-------------------------------------|------------------------|------------------------|------------------------|------------------------|------------------------|-------------------------|----------------------|-----------------------|
|       |                            |            | 1990                                |                        |                        | 2019                   |                        |                        |                         |                      |                       |
|       |                            |            | Both                                | Female                 | Male                   | Both                   | Female                 | Male                   | Both                    | Female               | Male                  |
|       | Egypt                      | Incidence  | 22.1 (19.5 to 24.6)                 | 24.7 (21.5 to 27.9)    | 19.6 (17.2 to 22.1)    | 38.8 (34.5 to 43.1)    | 37.2 (32.9 to 41.5)    | 39.7 (34.9 to 44.7)    | 75.6 (68.7 to 82.4)     | 51.1 (43.9 to 58.8)  | 102.9 (91.8 to 112.8) |
|       |                            | Prevalence | 416.4 (372.2 to 466.8)              | 465.8 (411.6 to 532.9) | 366.3 (324.9 to 413.1) | 746.9 (670.9 to 827.8) | 735.6 (655.2 to 823.3) | 748.8 (666.8 to 843.6) | 79.3 (72.1 to 86.2)     | 57.9 (50.4 to 65.6)  | 104.4 (93.2 to 116.5) |
|       |                            | Deaths     | 13.9 (9.2 to 18.3)                  | 14.6 (8 to 20.8)       | 13.1 (9.5 to 17.9)     | 15.5 (9.4 to 22.1)     | 19.3 (8.8 to 28.7)     | 13.3 (8.4 to 22)       | 11.5 (-17.5 to 46)      | 32.6 (-13.2 to 79.9) | 1.4 (-32.3 to 44)     |
|       |                            | DALYs      | 253 (175.1 to 325.7)                | 268.4 (155.4 to 382)   | 237.3 (174.8 to 313.1) | 289.4 (181.5 to 407.2) | 334.5 (164.2 to 494.1) | 260.4 (169.7 to 418.4) | 14.4 (-15.2 to 48.6)    | 24.6 (-15.8 to 66.8) | 9.7 (-23.6 to 53)     |
|       |                            | YLLs       | 234.6 (155.8 to 308.3)              | 248.5 (137.1 to 362.2) | 220.4 (158.2 to 296.9) | 257 (149.6 to 375.1)   | 304.5 (136.2 to 465.6) | 226.3 (135.2 to 384.8) | 9.5 (-22.2 to 46.4)     | 22.6 (-20.4 to 69.1) | 2.7 (-33.8 to 48.2)   |
|       |                            | YLDs       | 18.4 (13 to 24.9)                   | 19.9 (13.8 to 27.7)    | 16.9 (11.5 to 23.5)    | 32.4 (22.9 to 44.8)    | 29.9 (20.8 to 42.1)    | 34.1 (22.8 to 49.4)    | 76.2 (57.1 to 95.8)     | 50.4 (31 to 73)      | 101.2 (73.5 to 132.4) |
|       | Iran (Islamic Republic of) | Incidence  | 24.9 (22.6 to 27.4)                 | 25 (22.6 to 27.7)      | 24.9 (22.5 to 27.5)    | 33.7 (30.9 to 36.6)    | 32.8 (30.1 to 35.5)    | 34.4 (31.4 to 37.5)    | 35.5 (31.3 to 39.8)     | 31 (25.5 to 36.5)    | 38.3 (34.3 to 42.8)   |
|       |                            | Prevalence | 507.8 (462.8 to 556.2)              | 513.4 (465.1 to 567)   | 503 (458.1 to 551.4)   | 672.4 (618.4 to 729.1) | 660.8 (608.9 to 716.3) | 683.2 (627.7 to 741.8) | 32.4 (28.8 to 36.4)     | 28.7 (24.4 to 33.3)  | 35.8 (32.3 to 39.6)   |
|       |                            | Deaths     | 8.2 (6.8 to 10.3)                   | 7.3 (5.6 to 10.5)      | 9.2 (7.5 to 11)        | 7.1 (5.9 to 8.3)       | 6.6 (5.4 to 7.9)       | 7.5 (6.1 to 8.8)       | -14 (-31.7 to -1.2)     | -9.4 (-40.2 to 11.4) | -18.5 (-32.7 to -3)   |
|       |                            | DALYs      | 157.2 (132.2 to 187.4)              | 139.1 (111.1 to 176.5) | 174.9 (146.2 to 208.3) | 133.1 (113.7 to 153.3) | 121.6 (102.7 to 142.6) | 144.5 (121.8 to 168.6) | -15.3 (-27.8 to -4.9)   | -12.6 (-33.6 to 4.1) | -17.4 (-29.9 to -3.6) |
|       |                            | YLLs       | 138.1 (114.1 to 167.8)              | 120.9 (94.1 to 158.5)  | 155.1 (126.7 to 187)   | 110.2 (92.3 to 129.3)  | 101.1 (82.5 to 120.6)  | 119.3 (98.7 to 140.5)  | -20.2 (-33.8 to -8.8)   | -16.4 (-38.8 to 2.3) | -23.1 (-36.3 to -8.6) |
|       |                            | YLDs       | 19.1 (13.8 to 25.5)                 | 18.2 (13.2 to 24.3)    | 19.8 (14 to 26.7)      | 22.8 (16.5 to 31)      | 20.5 (14.9 to 27.5)    | 25.2 (17.7 to 34.4)    | 19.9 (13.5 to 26.6)     | 12.6 (5.2 to 19.9)   | 27 (18.8 to 34.9)     |

| Cause | Location | Measure    | Age-standardized rate (per 100,000) |                        |                        |                        |                        |                        | % Change (1990 to 2019) |                       |                       |
|-------|----------|------------|-------------------------------------|------------------------|------------------------|------------------------|------------------------|------------------------|-------------------------|-----------------------|-----------------------|
|       |          |            | 1990                                |                        |                        | 2019                   |                        |                        |                         |                       |                       |
|       |          |            | Both                                | Female                 | Male                   | Both                   | Female                 | Male                   | Both                    | Female                | Male                  |
|       | Iraq     | Incidence  | 23.8 (21.2 to 26.7)                 | 24.5 (21.7 to 27.7)    | 23.2 (20.3 to 26.3)    | 38.7 (35.1 to 42.9)    | 36 (32.5 to 40.2)      | 41.7 (37.1 to 47)      | 62.5 (55.9 to 69.3)     | 47.3 (40.1 to 55.5)   | 79.6 (70.1 to 90.4)   |
|       |          | Prevalence | 472.6 (423.1 to 526.1)              | 495.6 (442.9 to 554.1) | 448.2 (395.8 to 506.7) | 770.1 (696.1 to 853.3) | 733.3 (658.8 to 819.3) | 814.3 (723.3 to 914.6) | 63 (56.5 to 69)         | 48 (40.9 to 55.1)     | 81.7 (71.7 to 92.8)   |
|       |          | Deaths     | 15.2 (11.3 to 21.5)                 | 13.5 (9.3 to 21)       | 17.3 (12.4 to 26)      | 14.4 (10.6 to 19.4)    | 11.1 (8.1 to 15.1)     | 18.4 (12.4 to 28.6)    | -5.6 (-26.3 to 16.6)    | -17.7 (-42.9 to 13.9) | 6.7 (-20.8 to 40)     |
|       |          | DALYs      | 291.4 (221.8 to 393.4)              | 267.4 (191.9 to 394.4) | 318.7 (234.3 to 438.6) | 270.7 (204.2 to 346.3) | 219.4 (160.7 to 290.5) | 329.9 (239.2 to 449.1) | -7.1 (-27.9 to 15.5)    | -18 (-40.9 to 13.1)   | 3.5 (-22.4 to 34.4)   |
|       |          | YLLs       | 269.3 (199.2 to 368.6)              | 245.2 (168.5 to 372.2) | 296.7 (213.8 to 416.7) | 235.9 (173 to 313.5)   | 188.3 (131.6 to 260.9) | 290.9 (201.3 to 412.7) | -12.4 (-33.6 to 11.8)   | -23.2 (-46 to 9.6)    | -2 (-29 to 30.7)      |
|       |          | YLDs       | 22.1 (15.7 to 30.5)                 | 22.2 (15.5 to 30)      | 22 (15 to 31.1)        | 34.8 (24.1 to 48.4)    | 31.1 (21.5 to 43)      | 39.1 (26.5 to 56.6)    | 58 (40.6 to 76.7)       | 40.1 (17.6 to 64.6)   | 77.6 (52.5 to 106.9)  |
|       | Jordan   | Incidence  | 23.6 (21.1 to 26.2)                 | 26.7 (23.6 to 30)      | 20.6 (18 to 23.5)      | 40.1 (36.1 to 44.4)    | 38.2 (34.1 to 42.7)    | 41.9 (37 to 46.8)      | 70 (61.2 to 78.7)       | 43.2 (34.6 to 51.5)   | 102.8 (88.1 to 117.8) |
|       |          | Prevalence | 460.3 (413.9 to 509.5)              | 516.2 (462.8 to 577.5) | 403.5 (356.2 to 450.1) | 785 (716.8 to 860.8)   | 761 (688.8 to 845)     | 806.5 (718.5 to 903.2) | 70.5 (61 to 80)         | 47.4 (38 to 56.4)     | 99.9 (85.4 to 116.3)  |
|       |          | Deaths     | 13.9 (10.7 to 17.4)                 | 14.6 (10.7 to 19.5)    | 13.2 (9.9 to 16.8)     | 13 (10.2 to 16.1)      | 13.3 (9.9 to 17.3)     | 12.7 (9.6 to 16.6)     | -6.4 (-26.4 to 16.7)    | -8.7 (-37.6 to 25.9)  | -3.5 (-29.7 to 30.9)  |
|       |          | DALYs      | 246.3 (192.7 to 305.9)              | 259.3 (191.7 to 342.6) | 233.4 (180 to 295.8)   | 233.6 (188.4 to 280.8) | 230.4 (176.1 to 292.5) | 236.2 (181.5 to 305.6) | -5.2 (-24.9 to 17.5)    | -11.1 (-36.7 to 19.8) | 1.2 (-24 to 35.3)     |
|       |          | YLLs       | 226.1 (173.2 to 283.8)              | 237.7 (172.2 to 320.3) | 214.5 (161.1 to 277.9) | 200.9 (156.8 to 248.1) | 200.6 (147.2 to 262.1) | 200.8 (147.3 to 267.3) | -11.1 (-30.8 to 12.2)   | -15.6 (-42.2 to 17.8) | -6.4 (-32.6 to 29.3)  |
|       |          | YLDs       | 20.2 (14.2 to 27.8)                 | 21.7 (15.2 to 29.7)    | 18.9 (12.7 to 26.4)    | 32.7 (22.7 to 44.7)    | 29.9 (21.1 to 41.1)    | 35.4 (23.5 to 50.3)    | 61.6 (43.5 to 82.5)     | 37.9 (17.3 to 60.3)   | 87.3 (58.6 to 120.2)  |

| Cause | Location | Measure    | Age-standardized rate (per 100,000) |                        |                        |                        |                        |                        | % Change (1990 to 2019) |                        |                        |
|-------|----------|------------|-------------------------------------|------------------------|------------------------|------------------------|------------------------|------------------------|-------------------------|------------------------|------------------------|
|       |          |            | 1990                                |                        |                        | 2019                   |                        |                        |                         |                        |                        |
|       |          |            | Both                                | Female                 | Male                   | Both                   | Female                 | Male                   | Both                    | Female                 | Male                   |
|       | Kuwait   | Incidence  | 24.5 (21.8 to 27.7)                 | 27.5 (24.1 to 31.1)    | 23.1 (20.1 to 26.7)    | 37.7 (33.5 to 41.9)    | 35.9 (31.7 to 40)      | 38.7 (34 to 43.9)      | 53.6 (40.9 to 66.6)     | 30.6 (20.5 to 42.4)    | 67.6 (51.4 to 85.8)    |
|       |          | Prevalence | 495 (446.6 to 552.1)                | 553.2 (492 to 621.6)   | 454.3 (401.7 to 513.5) | 727 (653.1 to 808.8)   | 716.4 (640.2 to 796.2) | 732.2 (650.5 to 824.6) | 46.9 (35.5 to 59.5)     | 29.5 (18.9 to 41.3)    | 61.2 (45.6 to 78)      |
|       |          | Deaths     | 9.7 (7.6 to 11.7)                   | 10.1 (7.1 to 12.9)     | 9.5 (7.6 to 11.7)      | 6 (4.6 to 7.6)         | 5.5 (3.8 to 7.6)       | 6.3 (4.8 to 8.1)       | -37.9 (-48.2 to -24.6)  | -45.3 (-58.8 to -25)   | -33.3 (-45.9 to -17.7) |
|       |          | DALYs      | 182.1 (149.5 to 219.6)              | 196.2 (146.7 to 249)   | 175 (141.8 to 210.5)   | 117.6 (94.2 to 143.2)  | 110.7 (82.5 to 146.2)  | 121.9 (96.2 to 151.1)  | -35.5 (-45 to -23)      | -43.6 (-55.6 to -24.3) | -30.3 (-42.3 to -15.1) |
|       |          | YLLs       | 162.6 (128.5 to 199.5)              | 175.8 (123.5 to 227.5) | 155.9 (123.9 to 191.6) | 89.1 (68.7 to 112.9)   | 85.2 (58.6 to 118.1)   | 91.6 (68 to 119.2)     | -45.2 (-54.6 to -32.2)  | -51.5 (-63.8 to -30.3) | -41.2 (-53.1 to -25.8) |
|       |          | YLDs       | 19.5 (13.5 to 27.2)                 | 20.4 (14 to 27.7)      | 19.1 (12.8 to 27.3)    | 28.5 (19.5 to 40)      | 25.5 (17.4 to 36.5)    | 30.3 (19.8 to 43.5)    | 45.9 (27.2 to 68.7)     | 25 (6.3 to 47.8)       | 58.4 (31.5 to 90.4)    |
|       | Lebanon  | Incidence  | 21.8 (19.3 to 24.6)                 | 23.1 (20.3 to 26.2)    | 20.7 (18.1 to 23.8)    | 39.2 (35.1 to 43.5)    | 36.5 (32.6 to 40.8)    | 42.5 (37.6 to 47.7)    | 79.5 (70.2 to 90.3)     | 58.4 (49.4 to 69.4)    | 105.2 (91 to 120.9)    |
|       |          | Prevalence | 427.8 (383 to 478.1)                | 455.9 (405.7 to 512.9) | 397.9 (351.9 to 450.1) | 764.6 (690.7 to 843.7) | 729.2 (655.2 to 804.4) | 810.4 (723.9 to 916.3) | 78.7 (70.7 to 88)       | 60 (51.4 to 69.6)      | 103.7 (90.2 to 118.3)  |
|       |          | Deaths     | 11.4 (8.8 to 14.6)                  | 10.5 (7.7 to 14.9)     | 12.5 (9.5 to 16.1)     | 8.5 (6 to 11.4)        | 7.9 (5.3 to 10.2)      | 9.3 (5.5 to 15)        | -25.5 (-48 to -1.4)     | -25.1 (-49.7 to -1)    | -25.9 (-56.3 to 18.1)  |
|       |          | DALYs      | 207.6 (163.8 to 265.2)              | 195 (147.4 to 261.2)   | 221.8 (170 to 289.4)   | 161.7 (118.8 to 209.5) | 149.2 (108.4 to 188)   | 177.2 (116.5 to 266.1) | -22.1 (-42 to 0.4)      | -23.5 (-46.1 to -0.8)  | -20.1 (-46.8 to 19.3)  |
|       |          | YLLs       | 189.7 (146.8 to 246.8)              | 176.6 (128.1 to 244.3) | 204.4 (153.7 to 268.8) | 132.6 (92.6 to 178.6)  | 123 (82.7 to 161.6)    | 144.4 (84.8 to 234.2)  | -30.1 (-51.4 to -5.9)   | -30.3 (-53 to -6.1)    | -29.3 (-57.2 to 12.6)  |
|       |          | YLDs       | 17.9 (12.3 to 25.2)                 | 18.5 (12.7 to 25.4)    | 17.3 (11.5 to 25.1)    | 29 (19.8 to 39.9)      | 26.1 (17.7 to 36.6)    | 32.8 (21.2 to 47.1)    | 61.9 (44.3 to 81.6)     | 41.3 (21 to 64.2)      | 88.9 (60.7 to 122.1)   |

| Cause | Location | Measure    | Age-standardized rate (per 100,000) |                        |                        |                        |                        |                        | % Change (1990 to 2019) |                      |                       |
|-------|----------|------------|-------------------------------------|------------------------|------------------------|------------------------|------------------------|------------------------|-------------------------|----------------------|-----------------------|
|       |          |            | 1990                                |                        |                        | 2019                   |                        |                        |                         |                      |                       |
|       |          |            | Both                                | Female                 | Male                   | Both                   | Female                 | Male                   | Both                    | Female               | Male                  |
|       | Libya    | Incidence  | 22 (19.5 to 24.6)                   | 23.2 (20.3 to 26.4)    | 21.1 (18.5 to 23.8)    | 36.7 (32.7 to 40.8)    | 35 (30.9 to 39.2)      | 38.4 (33.7 to 43.4)    | 66.8 (59.8 to 73.6)     | 50.9 (43.4 to 59.7)  | 82.2 (71.4 to 93.1)   |
|       |          | Prevalence | 432.6 (388 to 481.3)                | 462.7 (410.1 to 519.7) | 405.6 (360.2 to 454.4) | 709.4 (636.7 to 787.7) | 698 (621.1 to 773.7)   | 721.8 (639.9 to 813.8) | 64 (58 to 70.1)         | 50.9 (43.7 to 59.1)  | 77.9 (68.4 to 88.8)   |
|       |          | Deaths     | 10.4 (7.4 to 14.4)                  | 10 (6.8 to 15)         | 10.7 (7.4 to 15.2)     | 10.6 (6.9 to 14.9)     | 10.8 (6.5 to 15.9)     | 10.3 (6.7 to 16.4)     | 2 (-25.3 to 36)         | 8.2 (-26.9 to 47.3)  | -4.1 (-34.6 to 41)    |
|       |          | DALYs      | 196.4 (146.3 to 261.5)              | 198 (141.6 to 274.6)   | 196 (140.1 to 275.4)   | 207.5 (146.4 to 280.5) | 215.5 (139 to 303.3)   | 199.9 (137.6 to 306.3) | 5.7 (-22.1 to 39.2)     | 8.8 (-23.9 to 46.6)  | 2 (-27.6 to 46.6)     |
|       |          | YLLs       | 178.2 (129.5 to 245.9)              | 179.1 (122.2 to 254.4) | 178.2 (122.8 to 254.9) | 178.5 (116 to 251.5)   | 188.3 (113.1 to 276.1) | 169.1 (109 to 274.3)   | 0.2 (-28.6 to 37)       | 5.1 (-29.9 to 47.2)  | -5.1 (-36.3 to 42.8)  |
|       |          | YLDs       | 18.2 (12.8 to 24.9)                 | 18.9 (13.1 to 26.4)    | 17.7 (11.7 to 24.9)    | 29 (20 to 40.5)        | 27.2 (18.4 to 38.4)    | 30.9 (21 to 44.2)      | 59.1 (42.3 to 77.6)     | 43.6 (22.9 to 65.8)  | 73.9 (48.8 to 101.4)  |
|       | Morocco  | Incidence  | 17.1 (15 to 19.4)                   | 17.9 (15.4 to 20.5)    | 16.5 (14.2 to 18.7)    | 35.5 (31.4 to 39.6)    | 32.8 (28.9 to 37.1)    | 38.4 (33.5 to 43.5)    | 107.1 (98.4 to 117)     | 83.7 (73.5 to 95.1)  | 133 (120.2 to 147.7)  |
|       |          | Prevalence | 331.4 (295.9 to 370.6)              | 351.8 (308.7 to 397.3) | 309.4 (273 to 348.6)   | 684.4 (613.2 to 756.2) | 652.8 (580.4 to 733.8) | 718.7 (636.4 to 803.2) | 106.5 (97.7 to 116.3)   | 85.5 (75.9 to 96)    | 132.3 (118.6 to 148)  |
|       |          | Deaths     | 9.9 (7.4 to 14.7)                   | 8.5 (6 to 13.8)        | 11.6 (8.2 to 17.8)     | 12.3 (9.2 to 16.5)     | 11.5 (8.3 to 16.6)     | 13.1 (8.9 to 19.1)     | 24.4 (-6.7 to 56.8)     | 34.5 (-11.3 to 84.9) | 13 (-17.4 to 51.7)    |
|       |          | DALYs      | 183.9 (143.9 to 252)                | 167.7 (123.4 to 247.2) | 203.1 (148.6 to 290.1) | 227.8 (174.8 to 294)   | 220.2 (161.8 to 296.3) | 236.4 (168.8 to 319.4) | 23.8 (-6.3 to 55.3)     | 31.3 (-10.4 to 79)   | 16.4 (-13.6 to 53)    |
|       |          | YLLs       | 169.1 (129.4 to 238.4)              | 152.3 (108.3 to 230.5) | 188.9 (133.2 to 277.3) | 197.8 (144.5 to 261.6) | 193.1 (139.1 to 267)   | 203.4 (138.6 to 287)   | 16.9 (-13.9 to 50.2)    | 26.8 (-17.3 to 79.3) | 7.7 (-23 to 45.9)     |
|       |          | YLDs       | 14.8 (10.2 to 20.1)                 | 15.4 (10.5 to 21.1)    | 14.2 (9.5 to 20)       | 30 (20.5 to 41.2)      | 27.1 (18.4 to 38.2)    | 33 (21.9 to 46.9)      | 102.6 (79.6 to 125.1)   | 76.4 (51.1 to 103.1) | 132.8 (99.3 to 167.9) |

| Cause | Location  | Measure    | Age-standardized rate (per 100,000) |                        |                        |                        |                        |                        | % Change (1990 to 2019) |                       |                        |
|-------|-----------|------------|-------------------------------------|------------------------|------------------------|------------------------|------------------------|------------------------|-------------------------|-----------------------|------------------------|
|       |           |            | 1990                                |                        |                        | 2019                   |                        |                        |                         |                       |                        |
|       |           |            | Both                                | Female                 | Male                   | Both                   | Female                 | Male                   | Both                    | Female                | Male                   |
|       | Oman      | Incidence  | 18.7 (16.6 to 21.1)                 | 19.4 (16.9 to 22.2)    | 18.5 (16.1 to 20.9)    | 37.3 (33.4 to 41.3)    | 34.4 (30.6 to 38.5)    | 40 (35.2 to 44.9)      | 98.9 (88.2 to 109.2)    | 77.6 (66.6 to 90)     | 116.4 (101.5 to 131.4) |
|       |           | Prevalence | 368.3 (331.9 to 411.7)              | 384.3 (341.5 to 432.7) | 354.9 (315.4 to 399.7) | 707.8 (643.9 to 779)   | 676 (603.9 to 749.3)   | 746.7 (666.9 to 830.2) | 92.2 (82.4 to 102.4)    | 75.9 (65.5 to 88.1)   | 110.4 (96 to 125.4)    |
|       |           | Deaths     | 5.9 (4.3 to 8)                      | 5.3 (3.8 to 7.4)       | 7.4 (5.2 to 10.6)      | 7.2 (5.6 to 8.8)       | 6.4 (4.7 to 8.3)       | 8.4 (6.4 to 10.8)      | 21 (-15.9 to 66.5)      | 21.9 (-18.7 to 69.1)  | 14.2 (-30.8 to 69.6)   |
|       |           | DALYs      | 115.3 (87.4 to 152.9)               | 108.5 (80.4 to 147.4)  | 128.7 (93 to 179)      | 135.6 (111.6 to 162.4) | 128.4 (99.7 to 159.3)  | 147.3 (117.9 to 181.5) | 17.6 (-11.8 to 52.1)    | 18.4 (-14.6 to 57.2)  | 14.5 (-21.8 to 60.3)   |
|       |           | YLLs       | 98 (71 to 135)                      | 90.4 (63.5 to 129.7)   | 111.7 (77.6 to 162.8)  | 103 (80.3 to 128.7)    | 98.1 (71.6 to 128.6)   | 112.1 (85.6 to 144)    | 5.1 (-25.1 to 45.4)     | 8.4 (-26.7 to 52.5)   | 0.3 (-37.3 to 52.2)    |
|       |           | YLDs       | 17.3 (12.3 to 23.7)                 | 18.1 (12.6 to 24.7)    | 16.9 (11.8 to 23.8)    | 32.7 (23.4 to 44.4)    | 30.3 (21.6 to 41.7)    | 35.2 (23.6 to 49.8)    | 88.6 (68.4 to 111.5)    | 68 (47 to 90.3)       | 107.8 (79.1 to 141)    |
|       | Palestine | Incidence  | 24.1 (21.6 to 26.9)                 | 24 (21.1 to 27.6)      | 24.2 (21.3 to 27.2)    | 38.3 (34.4 to 42.6)    | 35.1 (31.1 to 39.5)    | 42.1 (37.3 to 47.4)    | 59.1 (52.2 to 66.9)     | 46 (37.5 to 55.5)     | 74.4 (62.6 to 86.6)    |
|       |           | Prevalence | 477.3 (430.2 to 531.2)              | 486.3 (431.8 to 545.1) | 467 (415.7 to 522.3)   | 741.6 (671 to 821.6)   | 695.9 (623.7 to 775.9) | 803.7 (714.6 to 901.2) | 55.4 (49.2 to 61.9)     | 43.1 (34.8 to 52)     | 72.1 (59.6 to 84.7)    |
|       |           | Deaths     | 16.4 (12.7 to 20.8)                 | 14 (10.3 to 18.3)      | 19.9 (15.2 to 25.6)    | 11.7 (9.2 to 14.5)     | 10 (7.6 to 12.7)       | 14.9 (11.4 to 18.5)    | -28.4 (-45.5 to -8.3)   | -28.6 (-46.9 to -2.9) | -24.9 (-44.9 to -2.4)  |
|       |           | DALYs      | 306.1 (234.3 to 390.6)              | 270.5 (196.7 to 351.3) | 352.8 (266.6 to 462.8) | 225 (180.8 to 274.3)   | 195 (150.4 to 243.5)   | 267.1 (213.9 to 324.1) | -26.5 (-42.8 to -5.5)   | -27.9 (-46.5 to -2.3) | -24.3 (-42.8 to -1.6)  |
|       |           | YLLs       | 285.3 (213.2 to 370.3)              | 250 (176 to 333.3)     | 331.4 (246.9 to 441.4) | 194 (150.7 to 242.8)   | 167.7 (125.1 to 215.7) | 231.5 (178.8 to 290.2) | -32 (-48.8 to -10.6)    | -32.9 (-51.6 to -6)   | -30.1 (-48.3 to -7.5)  |
|       |           | YLDs       | 20.8 (14.3 to 28.6)                 | 20.5 (14.4 to 28.5)    | 21.3 (13.9 to 29.7)    | 31 (21.1 to 42.5)      | 27.3 (18.9 to 37.7)    | 35.6 (23.7 to 51)      | 49.1 (31.7 to 68.7)     | 33.5 (13.6 to 57.2)   | 66.7 (41.7 to 95.4)    |

| Cause | Location     | Measure    | Age-standardized rate (per 100,000) |                        |                        |                         |                        |                        | % Change (1990 to 2019) |                      |                       |
|-------|--------------|------------|-------------------------------------|------------------------|------------------------|-------------------------|------------------------|------------------------|-------------------------|----------------------|-----------------------|
|       |              |            | 1990                                |                        |                        | 2019                    |                        |                        |                         |                      |                       |
|       |              |            | Both                                | Female                 | Male                   | Both                    | Female                 | Male                   | Both                    | Female               | Male                  |
|       | Qatar        | Incidence  | 26.8 (23.8 to 30.2)                 | 30 (26.3 to 34.3)      | 26.3 (23.1 to 29.9)    | 44.2 (39.8 to 49.2)     | 39.7 (35.7 to 44.7)    | 46 (40.9 to 51.6)      | 64.7 (57 to 72.8)       | 32.2 (24.7 to 40.3)  | 75.1 (65.6 to 85.4)   |
|       |              | Prevalence | 511.1 (456.3 to 573.3)              | 573.4 (507.4 to 650.3) | 470.7 (417.5 to 531.2) | 852.2 (766.6 to 946.1)  | 803.9 (719.9 to 893.5) | 867.6 (777.2 to 974.2) | 66.7 (58.1 to 75)       | 40.2 (31.8 to 48.5)  | 84.3 (73.4 to 95.3)   |
|       |              | Deaths     | 17.1 (12.3 to 30.1)                 | 18.2 (12.1 to 36.6)    | 16.8 (11.6 to 26)      | 17.5 (13.2 to 22.4)     | 24.7 (18.2 to 32.2)    | 15.2 (11.4 to 20.1)    | 2.6 (-35.9 to 41)       | 35.4 (-29.5 to 98.4) | -9.9 (-39.5 to 32)    |
|       |              | DALYs      | 277.2 (205.4 to 446.4)              | 309 (214.6 to 573.3)   | 263.6 (189.1 to 385.4) | 258.1 (203.8 to 324.8)  | 353.7 (265.3 to 458.7) | 225.9 (174.6 to 288.2) | -6.9 (-38.2 to 25)      | 14.5 (-34.5 to 62.9) | -14.3 (-39.7 to 20.8) |
|       |              | YLLs       | 254.9 (184.5 to 423.7)              | 285.2 (191.7 to 548.5) | 241.7 (165.5 to 360.9) | 221.1 (166.7 to 288.8)  | 321.9 (234.3 to 426.7) | 187 (137 to 249.2)     | -13.3 (-43.9 to 20.7)   | 12.9 (-37.7 to 66.9) | -22.6 (-48.4 to 14)   |
|       |              | YLDs       | 22.3 (15.8 to 31.1)                 | 23.8 (16.8 to 33.1)    | 21.9 (14.8 to 31.1)    | 37.1 (25.5 to 52.2)     | 31.8 (22.2 to 43.9)    | 38.9 (26 to 56)        | 66.2 (45.9 to 88)       | 33.8 (15.4 to 55.7)  | 77.4 (53.3 to 107.3)  |
|       | Saudi Arabia | Incidence  | 25 (22.2 to 28)                     | 26.4 (23.1 to 29.9)    | 24.2 (21.3 to 27.4)    | 45.7 (41.4 to 50.2)     | 41 (36.8 to 45.8)      | 48.7 (43.7 to 53.9)    | 82.8 (72.7 to 94)       | 55.6 (45.2 to 66.8)  | 101.6 (88.2 to 115.5) |
|       |              | Prevalence | 489.7 (439.4 to 539.9)              | 528.8 (465.6 to 591.5) | 460.2 (410.9 to 515.6) | 926.3 (841.3 to 1008.6) | 879 (792.2 to 975.7)   | 961.8 (864 to 1063.4)  | 89.1 (79.6 to 99.4)     | 66.2 (54.8 to 79.3)  | 109 (96.1 to 123.5)   |
|       |              | Deaths     | 16.9 (12.7 to 21.9)                 | 13.9 (10.4 to 18.6)    | 19.8 (14.2 to 26.9)    | 19.3 (14.7 to 24.1)     | 17.6 (12.3 to 23.5)    | 20.7 (15.5 to 26.3)    | 14.3 (-18.9 to 56.4)    | 27 (-15.3 to 81.2)   | 4.3 (-30.4 to 54.6)   |
|       |              | DALYs      | 324.2 (244 to 427.4)                | 282.3 (210 to 379.6)   | 361.2 (258.9 to 492.7) | 360.9 (283 to 452.8)    | 340.2 (245 to 456.3)   | 376.6 (291.5 to 469.4) | 11.3 (-20.5 to 51.7)    | 20.5 (-17.7 to 68.2) | 4.3 (-30.2 to 54.5)   |
|       |              | YLLs       | 302.5 (221.6 to 406.1)              | 259.9 (187.4 to 357.4) | 339.9 (239.9 to 470.4) | 322 (242.2 to 411.3)    | 305.2 (212.5 to 420)   | 335.1 (252.5 to 430.9) | 6.4 (-25.2 to 49.3)     | 17.4 (-22.5 to 69.8) | -1.4 (-35 to 51.7)    |
|       |              | YLDs       | 21.7 (15.1 to 29.7)                 | 22.4 (15.7 to 30.8)    | 21.3 (14.5 to 30.2)    | 38.9 (26.7 to 54.4)     | 35.1 (23.7 to 49.2)    | 41.5 (27.9 to 59.3)    | 79.3 (58.3 to 102)      | 56.5 (33.5 to 83)    | 95 (66.1 to 126.9)    |

| Cause | Location             | Measure    | Age-standardized rate (per 100,000) |                        |                        |                        |                        |                        | % Change (1990 to 2019) |                      |                       |
|-------|----------------------|------------|-------------------------------------|------------------------|------------------------|------------------------|------------------------|------------------------|-------------------------|----------------------|-----------------------|
|       |                      |            | 1990                                |                        |                        | 2019                   |                        |                        |                         |                      |                       |
|       |                      |            | Both                                | Female                 | Male                   | Both                   | Female                 | Male                   | Both                    | Female               | Male                  |
|       | Sudan                | Incidence  | 17.2 (15.1 to 19.3)                 | 17.9 (15.6 to 20.5)    | 16.5 (14.4 to 18.8)    | 31.5 (27.9 to 35.4)    | 29.5 (25.8 to 33.4)    | 33.2 (29 to 37.9)      | 83.8 (76 to 91.6)       | 64.5 (55.9 to 72.8)  | 101.2 (89.9 to 113.5) |
|       |                      | Prevalence | 328.2 (292.9 to 370)                | 345.7 (303.9 to 394.9) | 311.1 (274.7 to 350.2) | 587.9 (522.2 to 653.8) | 562.8 (496.1 to 632.4) | 608.4 (537 to 686)     | 79.1 (71.4 to 87)       | 62.8 (54.4 to 71.3)  | 95.6 (83.7 to 108)    |
|       |                      | Deaths     | 10.5 (7.6 to 15.9)                  | 8.9 (6.1 to 14.7)      | 12.1 (8.6 to 18.9)     | 10.6 (7.1 to 17.3)     | 9.4 (6 to 14)          | 11.7 (7.3 to 21.3)     | 1.3 (-32.1 to 51.1)     | 5.3 (-39.2 to 55.1)  | -3.4 (-36 to 61.3)    |
|       |                      | DALYs      | 204.8 (152.7 to 296.6)              | 184.6 (128.9 to 283.3) | 224.6 (164.8 to 337.4) | 204.5 (144.3 to 315)   | 187.9 (127.6 to 273.2) | 218.8 (143 to 369.5)   | -0.1 (-31.5 to 44.3)    | 1.8 (-38.8 to 47.3)  | -2.6 (-35.5 to 54.8)  |
|       |                      | YLLs       | 190.7 (139.3 to 281.7)              | 170.1 (114.7 to 269.2) | 211.1 (151.5 to 320.9) | 179.8 (118.9 to 285.8) | 165.3 (104.1 to 250.8) | 192.4 (118.1 to 344.6) | -5.7 (-38.4 to 41.3)    | -2.8 (-44.6 to 45.5) | -8.8 (-41.7 to 51.6)  |
|       |                      | YLDs       | 14.1 (9.8 to 19.4)                  | 14.5 (10.2 to 20.2)    | 13.6 (9.4 to 19.1)     | 24.7 (16.9 to 34.8)    | 22.6 (15.5 to 30.9)    | 26.4 (17.8 to 38.2)    | 75.7 (56.6 to 95.9)     | 55.2 (35.6 to 77.7)  | 94.5 (66.8 to 126.8)  |
|       | Syrian Arab Republic | Incidence  | 22.1 (19.7 to 24.8)                 | 24.2 (21.2 to 27.3)    | 20.2 (17.7 to 23.2)    | 36.3 (32.9 to 40.1)    | 35 (31.1 to 38.7)      | 37.2 (32.8 to 42.1)    | 64.2 (54.5 to 74.1)     | 44.9 (36.4 to 54.5)  | 83.7 (67.9 to 100.1)  |
|       |                      | Prevalence | 438.1 (392.5 to 487.6)              | 476.6 (422.1 to 536)   | 403.5 (357.4 to 457.5) | 697 (635.5 to 769.7)   | 681.5 (607.8 to 760)   | 705.7 (630.8 to 787.2) | 59.1 (50 to 68.4)       | 43 (34.2 to 51.6)    | 74.9 (60.8 to 90.7)   |
|       |                      | Deaths     | 12.8 (9.8 to 17.2)                  | 12.1 (9.2 to 16.3)     | 13.5 (9.9 to 19)       | 10.3 (7.6 to 13.3)     | 11.1 (8.2 to 14.5)     | 10 (7.3 to 13.2)       | -20 (-43.8 to 7.6)      | -8 (-38 to 25.3)     | -26.3 (-52.7 to 7.8)  |
|       |                      | DALYs      | 244.8 (190 to 318.5)                | 227.9 (174.3 to 301.2) | 260.1 (195.6 to 352.5) | 190.2 (145 to 246.9)   | 191.5 (143.3 to 254.2) | 192.8 (145.6 to 252.8) | -22.3 (-43.1 to 4.2)    | -16 (-39.7 to 13.7)  | -25.9 (-49.8 to 7.4)  |
|       |                      | YLLs       | 225 (171.2 to 299.2)                | 207.2 (153.1 to 280.3) | 241.1 (174.2 to 332.4) | 162.2 (118.4 to 218.1) | 165.7 (119.5 to 228.8) | 163.1 (117.4 to 222.9) | -27.9 (-48.9 to 0.2)    | -20 (-44.7 to 12.6)  | -32.4 (-56.3 to 2.6)  |
|       |                      | YLDs       | 19.8 (13.8 to 27.8)                 | 20.7 (14.3 to 29)      | 19 (12.7 to 27.2)      | 28 (19.3 to 38.4)      | 25.8 (17.4 to 35.6)    | 29.7 (19.8 to 41.9)    | 41 (24 to 58.8)         | 24.3 (6.8 to 45.5)   | 56.6 (30.8 to 86.4)   |

| Cause | Location | Measure    | Age-standardized rate (per 100,000) |                        |                        |                        |                        |                        | % Change (1990 to 2019) |                       |                       |
|-------|----------|------------|-------------------------------------|------------------------|------------------------|------------------------|------------------------|------------------------|-------------------------|-----------------------|-----------------------|
|       |          |            | 1990                                |                        |                        | 2019                   |                        |                        |                         |                       |                       |
|       |          |            | Both                                | Female                 | Male                   | Both                   | Female                 | Male                   | Both                    | Female                | Male                  |
|       | Tunisia  | Incidence  | 21.2 (18.8 to 23.8)                 | 22.1 (19.2 to 25)      | 20.5 (18 to 23.4)      | 37.3 (33.3 to 41.2)    | 34.9 (30.8 to 38.9)    | 39.9 (35.6 to 44.8)    | 75.6 (66.9 to 83.9)     | 57.8 (48.2 to 67.6)   | 94.9 (82.7 to 108.7)  |
|       |          | Prevalence | 405.9 (366.8 to 450.4)              | 427.7 (380.4 to 478.1) | 384.8 (343.6 to 435.4) | 705.4 (638.3 to 776.8) | 676.1 (606.4 to 750.1) | 740.2 (664.3 to 827.2) | 73.8 (66.1 to 81.4)     | 58.1 (49.6 to 67.7)   | 92.4 (80.8 to 105.2)  |
|       |          | Deaths     | 8.5 (6.5 to 10.8)                   | 7.5 (5.7 to 10.8)      | 9.7 (7.3 to 12.4)      | 8.4 (5.9 to 11.6)      | 7.6 (5 to 10.6)        | 9.4 (6.3 to 13.6)      | -1.3 (-32.3 to 33.7)    | 0.5 (-31.8 to 42)     | -2.8 (-36.8 to 39.1)  |
|       |          | DALYs      | 154.3 (122.5 to 193.4)              | 141.6 (110.7 to 195.9) | 167.9 (128.2 to 213.2) | 157.4 (116.5 to 209.1) | 142.6 (102.6 to 193.3) | 174.4 (125.6 to 246.1) | 2.1 (-25.7 to 35.5)     | 0.7 (-28.1 to 38.6)   | 3.9 (-27 to 43.3)     |
|       |          | YLLs       | 136.9 (105.9 to 176.1)              | 124.7 (93.8 to 178.7)  | 150.2 (110.3 to 194.9) | 129.5 (90.1 to 182.9)  | 118.2 (77.3 to 170.1)  | 142.5 (94.7 to 210.2)  | -5.4 (-35.6 to 30.2)    | -5.2 (-37.3 to 37.4)  | -5.1 (-37.9 to 38.1)  |
|       |          | YLDs       | 17.3 (12.2 to 23.6)                 | 16.9 (11.8 to 23.4)    | 17.7 (12.1 to 24.4)    | 27.9 (19.2 to 38.5)    | 24.4 (16.5 to 33.1)    | 31.9 (21.4 to 44.9)    | 61.2 (44.3 to 81.5)     | 43.8 (24 to 66.2)     | 80.5 (53.8 to 109.8)  |
|       | Turkey   | Incidence  | 19 (17.1 to 21)                     | 18.2 (16.1 to 20.6)    | 19.8 (17.7 to 22)      | 35.9 (32.2 to 39.9)    | 32.8 (29.2 to 37)      | 39.5 (35 to 44.8)      | 89.2 (76.2 to 103.4)    | 79.8 (66.5 to 95.5)   | 99.2 (83.4 to 118.4)  |
|       |          | Prevalence | 358 (327.1 to 394.1)                | 349.8 (313.5 to 391.1) | 368.1 (332.8 to 406.7) | 669.5 (607.5 to 737.3) | 619.7 (553.3 to 688.1) | 731.1 (654.2 to 824.6) | 87 (75 to 100)          | 77.2 (64.2 to 92.5)   | 98.7 (83 to 117.7)    |
|       |          | Deaths     | 11.7 (8.5 to 17.9)                  | 9.3 (6.5 to 15)        | 14.8 (10.2 to 23.6)    | 8.2 (6.1 to 10.6)      | 7.4 (5.3 to 9.8)       | 9.4 (6.9 to 12.1)      | -29.6 (-56.2 to -2.1)   | -20.7 (-52.7 to 13.1) | -36.8 (-61.5 to -4.4) |
|       |          | DALYs      | 217.6 (163.8 to 309.1)              | 174.9 (127.3 to 262)   | 267.5 (194.9 to 401.4) | 154.2 (119.4 to 192.4) | 135 (104.1 to 172.4)   | 176.5 (136.2 to 222.9) | -29.2 (-52 to -5.6)     | -22.8 (-48.8 to 6.2)  | -34 (-57.2 to -4.8)   |
|       |          | YLLs       | 200.7 (145.8 to 290.6)              | 159 (111.6 to 247.2)   | 249.4 (178.3 to 383.2) | 126.9 (94.9 to 164.5)  | 111.5 (82 to 148.5)    | 144.7 (106.2 to 190.5) | -36.8 (-59 to -11.8)    | -29.9 (-56 to 1.4)    | -42 (-63.6 to -12.9)  |
|       |          | YLDs       | 16.9 (12.1 to 23.4)                 | 15.9 (11.4 to 22.1)    | 18.1 (12.5 to 25.3)    | 27.3 (19 to 38.1)      | 23.6 (16.4 to 32.7)    | 31.7 (20.9 to 45.5)    | 61.5 (43.4 to 83.4)     | 48.7 (29.5 to 73.8)   | 74.9 (48.1 to 103.7)  |



| Cause | Location             | Measure    | Age-standardized rate (per 100,000) |                        |                        |                        |                        |                        | % Change (1990 to 2019) |                       |                       |
|-------|----------------------|------------|-------------------------------------|------------------------|------------------------|------------------------|------------------------|------------------------|-------------------------|-----------------------|-----------------------|
|       |                      |            | 1990                                |                        |                        | 2019                   |                        |                        |                         |                       |                       |
|       |                      |            | Both                                | Female                 | Male                   | Both                   | Female                 | Male                   | Both                    | Female                | Male                  |
|       | United Arab Emirates | Incidence  | 28.5 (25.4 to 31.7)                 | 29.6 (26.1 to 33.4)    | 28 (24.7 to 31.5)      | 43.8 (39.6 to 48.4)    | 40.6 (36.5 to 45.1)    | 45.6 (40.9 to 50.8)    | 53.9 (47.6 to 60.4)     | 37.2 (30.9 to 43.8)   | 63.1 (54.9 to 71.1)   |
|       |                      | Prevalence | 540 (485.4 to 600.9)                | 573.4 (506.4 to 650.3) | 516.8 (458.2 to 580.5) | 856.3 (772.9 to 945.8) | 815.3 (737 to 899.2)   | 874.4 (782.3 to 977.6) | 58.6 (51.4 to 65.1)     | 42.2 (34.8 to 48.9)   | 69.2 (59.5 to 78.8)   |
|       |                      | Deaths     | 21.1 (12.1 to 27.4)                 | 20.3 (11.3 to 29.9)    | 21.8 (12.3 to 29.6)    | 17 (9.7 to 26.6)       | 16.7 (8.2 to 24)       | 17.1 (9.8 to 30.1)     | -19.6 (-44.9 to 15.5)   | -17.5 (-52.8 to 22.4) | -21.7 (-46.8 to 23.6) |
|       |                      | DALYs      | 385.5 (237.8 to 495.7)              | 368 (224.3 to 527.5)   | 397.6 (242.5 to 541.3) | 325.6 (206.5 to 490.1) | 312.9 (176.7 to 438.8) | 330.5 (211.3 to 547.5) | -15.6 (-40.5 to 18.7)   | -15 (-49.1 to 24.3)   | -16.9 (-43.2 to 27)   |
|       |                      | YLLs       | 361.1 (214.9 to 470)                | 343.9 (196.8 to 504.1) | 372.8 (216.6 to 518)   | 287.9 (170.9 to 453.2) | 280.7 (144.9 to 405.8) | 290.4 (171.9 to 510.1) | -20.3 (-46.1 to 16)     | -18.4 (-53.7 to 23.3) | -22.1 (-49.5 to 24.2) |
|       |                      | YLDs       | 24.4 (17 to 33.5)                   | 24 (16.6 to 33.4)      | 24.8 (17 to 35.4)      | 37.7 (25.8 to 52.9)    | 32.3 (22.3 to 45.4)    | 40.1 (26.8 to 58.1)    | 54.6 (35.6 to 75.3)     | 34.1 (16.2 to 55.9)   | 61.6 (39.1 to 89.2)   |
|       | Yemen                | Incidence  | 16.7 (14.8 to 18.9)                 | 17.1 (15 to 19.6)      | 16.5 (14.4 to 18.9)    | 28.9 (25.5 to 32.5)    | 27.4 (23.7 to 32.2)    | 30.5 (26.5 to 34.9)    | 72.8 (63.1 to 85.9)     | 60.5 (46.4 to 83.5)   | 85 (74.3 to 95.7)     |
|       |                      | Prevalence | 323.3 (287.6 to 363.9)              | 332.1 (292.6 to 377.6) | 311 (274.6 to 354.1)   | 536.4 (477.7 to 599.3) | 519.8 (451.4 to 610.1) | 555.1 (485.2 to 629.6) | 65.9 (56.6 to 79.2)     | 56.5 (43.1 to 80.3)   | 78.5 (68.1 to 88.8)   |
|       |                      | Deaths     | 8.7 (6.1 to 12.4)                   | 7.1 (4.8 to 11.5)      | 11.6 (8 to 17.3)       | 8.4 (6.1 to 11.7)      | 6.9 (4.9 to 9.9)       | 10.1 (7.1 to 14.5)     | -3.4 (-27.1 to 27.1)    | -3.1 (-32.6 to 35.8)  | -12.6 (-34.1 to 17.3) |
|       |                      | DALYs      | 176.1 (125.1 to 241)                | 149.2 (101.9 to 228.7) | 215.6 (151.9 to 307.8) | 168.6 (128 to 226.5)   | 145.8 (106.9 to 205.8) | 193.4 (142.8 to 263.8) | -4.2 (-27.4 to 26.4)    | -2.3 (-30.7 to 34)    | -10.3 (-32.7 to 20.4) |
|       |                      | YLLs       | 161.7 (110.9 to 228.4)              | 134.5 (87.7 to 213.5)  | 201.5 (138.1 to 291.4) | 145.6 (105.8 to 203.5) | 123.8 (86.5 to 182)    | 169.2 (116.5 to 240.5) | -10 (-33.4 to 22.8)     | -8 (-38.4 to 32.8)    | -16 (-38.5 to 15.9)   |
|       |                      | YLDs       | 14.4 (10 to 19.6)                   | 14.7 (10.1 to 20.3)    | 14.1 (9.4 to 19.8)     | 23 (15.7 to 32)        | 22 (15 to 30.9)        | 24.1 (16.1 to 34.1)    | 60.2 (42.3 to 79.6)     | 49.9 (26.1 to 80.3)   | 71 (46.8 to 99.7)     |

| Cause                                            | Location                     | Measure    | Age-standardized rate (per 100,000) |                        |                        |                        |                        |                        | % Change (1990 to 2019) |                       |                       |
|--------------------------------------------------|------------------------------|------------|-------------------------------------|------------------------|------------------------|------------------------|------------------------|------------------------|-------------------------|-----------------------|-----------------------|
|                                                  |                              |            | 1990                                |                        |                        | 2019                   |                        |                        |                         |                       |                       |
|                                                  |                              |            | Both                                | Female                 | Male                   | Both                   | Female                 | Male                   | Both                    | Female                | Male                  |
| Chronic kidney disease due to glomerulonephritis | North Africa and Middle East | Incidence  | 8.2 (7.4 to 9.1)                    | 6.3 (5.5 to 7.2)       | 9.9 (9 to 11)          | 13.4 (12 to 14.9)      | 9.6 (8.4 to 11)        | 17 (15.3 to 18.8)      | 64.2 (58.3 to 69.6)     | 52.4 (46.1 to 58.7)   | 70.5 (64.3 to 76.6)   |
|                                                  |                              | Prevalence | 192.5 (175.4 to 210.5)              | 174.5 (156.6 to 193.6) | 209.9 (191.8 to 229.7) | 280.6 (255.5 to 307.4) | 241.3 (216.9 to 267.6) | 317.6 (289.3 to 350.3) | 45.8 (41.6 to 50.2)     | 38.3 (33.6 to 43)     | 51.3 (46.5 to 56.4)   |
|                                                  |                              | Deaths     | 2 (1.5 to 2.7)                      | 1.7 (1.3 to 2.3)       | 2.4 (1.7 to 3.3)       | 1.7 (1.2 to 2.3)       | 1.5 (1 to 2)           | 1.9 (1.4 to 2.7)       | -16.9 (-31.1 to -1.3)   | -15.4 (-33.7 to 0.6)  | -18.9 (-35.4 to 2.5)  |
|                                                  |                              | DALYs      | 71.2 (57.6 to 87.3)                 | 67.8 (54 to 84.4)      | 74.7 (60.1 to 93.5)    | 64 (50.2 to 79.8)      | 60 (46.3 to 74.8)      | 67.9 (53.5 to 86.6)    | -10.1 (-21.7 to 2.9)    | -11.5 (-25.6 to 2.6)  | -9.2 (-21.5 to 7.3)   |
|                                                  |                              | YLLs       | 57.8 (44.7 to 73.1)                 | 53.6 (40.5 to 69.5)    | 62.2 (48.1 to 80.7)    | 43.3 (32.4 to 56.6)    | 39.1 (28.1 to 52.6)    | 47.5 (34.7 to 64.9)    | -25 (-37 to -10.7)      | -27 (-42 to -11.5)    | -23.7 (-36.3 to -5.8) |
|                                                  |                              | YLDs       | 13.4 (9.1 to 18.3)                  | 14.2 (9.6 to 19.5)     | 12.6 (8.6 to 17.2)     | 20.6 (14 to 28.2)      | 20.9 (14.3 to 28.7)    | 20.4 (13.8 to 28)      | 54.1 (46.5 to 63)       | 46.8 (37.2 to 57.6)   | 62.3 (52.1 to 73.6)   |
|                                                  | Afghanistan                  | Incidence  | 7.9 (5.8 to 10.6)                   | 6.8 (4.3 to 10.1)      | 9 (6.7 to 11.9)        | 11.8 (8.7 to 15.8)     | 9.4 (6.1 to 14.1)      | 14.3 (10.6 to 18.7)    | 49.6 (43.7 to 56)       | 38.2 (32.2 to 45.2)   | 58 (49.5 to 66.1)     |
|                                                  |                              | Prevalence | 177 (144.6 to 219.2)                | 175.8 (135.6 to 225.1) | 176.5 (142 to 218.9)   | 248 (201.2 to 306.9)   | 236.5 (182.2 to 308.3) | 261.5 (210.5 to 328.1) | 40.2 (33.9 to 46.7)     | 34.6 (27.6 to 42.5)   | 48.1 (38.8 to 57.3)   |
|                                                  |                              | Deaths     | 3.6 (2.5 to 5.5)                    | 3.2 (2.2 to 5.2)       | 3.9 (2.5 to 6.2)       | 2.9 (2 to 4.5)         | 2.7 (1.7 to 4.3)       | 3.2 (2 to 5.2)         | -19.3 (-40.2 to 4.6)    | -18.1 (-46.8 to 12.4) | -17.6 (-38.1 to 7.7)  |
|                                                  |                              | DALYs      | 127.6 (94.3 to 179.5)               | 133 (91.1 to 205.5)    | 118.9 (86.3 to 167.1)  | 103.6 (76.7 to 145.5)  | 107 (75 to 161.5)      | 101.5 (71.8 to 144.4)  | -18.8 (-37.8 to 3.2)    | -19.6 (-43.5 to 6.9)  | -14.6 (-34.6 to 12.9) |
|                                                  |                              | YLLs       | 113.9 (80.7 to 165.8)               | 116.8 (75.5 to 189)    | 108.1 (76.2 to 156.5)  | 83.3 (57.5 to 126.1)   | 83.5 (53.3 to 137.7)   | 84.1 (56.1 to 128.4)   | -26.8 (-46.1 to -3.3)   | -28.5 (-52.9 to -0.2) | -22.2 (-42.9 to 7.9)  |
|                                                  |                              | YLDs       | 13.8 (8.9 to 20.4)                  | 16.2 (10.2 to 24.4)    | 10.9 (6.8 to 16.2)     | 20.3 (12.9 to 29.9)    | 23.5 (14.3 to 35.8)    | 17.4 (10.8 to 25.4)    | 47.4 (25.9 to 70.8)     | 45 (17.7 to 77.2)     | 60.6 (29.9 to 100.4)  |

| Cause | Location | Measure    | Age-standardized rate (per 100,000) |                        |                        |                        |                        |                        | % Change (1990 to 2019) |                       |                       |
|-------|----------|------------|-------------------------------------|------------------------|------------------------|------------------------|------------------------|------------------------|-------------------------|-----------------------|-----------------------|
|       |          |            | 1990                                |                        |                        | 2019                   |                        |                        |                         |                       |                       |
|       |          |            | Both                                | Female                 | Male                   | Both                   | Female                 | Male                   | Both                    | Female                | Male                  |
|       | Algeria  | Incidence  | 8.1 (5.9 to 10.7)                   | 6.6 (4.4 to 9.6)       | 9.6 (7.1 to 12.6)      | 13.3 (9.9 to 17.2)     | 9.9 (6.7 to 14.3)      | 16.5 (12.5 to 21.2)    | 63.6 (56.4 to 72.3)     | 50.8 (42.9 to 58.8)   | 71.3 (61.1 to 82.4)   |
|       |          | Prevalence | 192.2 (155.7 to 237.9)              | 179.1 (138.4 to 230.5) | 205.2 (164.4 to 256)   | 283.8 (230.3 to 352.4) | 250.4 (194.1 to 321.6) | 316.1 (250.5 to 394.6) | 47.7 (40.3 to 55.2)     | 39.8 (31.4 to 48.3)   | 54.1 (44.3 to 65.2)   |
|       |          | Deaths     | 2.2 (1.5 to 3.3)                    | 2.1 (1.3 to 3.7)       | 2.4 (1.6 to 3.5)       | 1.7 (1.1 to 2.5)       | 1.7 (1.1 to 2.6)       | 1.7 (1.1 to 2.5)       | -25.6 (-43.1 to -1.4)   | -18.1 (-41 to 10.1)   | -30.3 (-48.8 to -0.8) |
|       |          | DALYs      | 72.8 (54.3 to 101.8)                | 74.5 (51.5 to 119.2)   | 71 (52.9 to 94)        | 60.6 (46 to 78.6)      | 63 (46.3 to 86.8)      | 58.4 (43 to 78.6)      | -16.7 (-34.3 to 5.2)    | -15.4 (-38.7 to 9.6)  | -17.8 (-38 to 10.5)   |
|       |          | YLLs       | 59.2 (41.6 to 88.5)                 | 59.6 (37.5 to 104)     | 58.8 (41.2 to 82.5)    | 39.3 (27.1 to 55.5)    | 40.7 (27.1 to 62.3)    | 38 (25.9 to 56.5)      | -33.7 (-49.2 to -10.8)  | -31.7 (-51.2 to -6.1) | -35.4 (-53.7 to -5.8) |
|       |          | YLDs       | 13.5 (8.4 to 20)                    | 14.9 (9 to 22.6)       | 12.3 (7.4 to 18.1)     | 21.3 (13.4 to 31.3)    | 22.3 (13.5 to 33.8)    | 20.4 (12.3 to 30.7)    | 57.6 (37.3 to 83.6)     | 49.8 (21.7 to 84.1)   | 66.5 (34.8 to 106.4)  |
|       | Bahrain  | Incidence  | 8.2 (6.2 to 10.7)                   | 6.3 (4.3 to 9)         | 9.7 (7.4 to 12.4)      | 14.8 (11.4 to 19)      | 9.6 (6.5 to 13.8)      | 18 (13.7 to 23.1)      | 80.4 (70 to 92.3)       | 52.9 (44.1 to 62.2)   | 86.4 (74.5 to 99.5)   |
|       |          | Prevalence | 189.5 (153.6 to 233.7)              | 173 (133.5 to 222.1)   | 203.7 (163.5 to 256.3) | 295.9 (240.3 to 366.3) | 242.8 (188.5 to 314.8) | 333.1 (267.9 to 418.5) | 56.1 (46.9 to 66)       | 40.3 (30.7 to 50.7)   | 63.6 (51.6 to 75.8)   |
|       |          | Deaths     | 1.9 (1.3 to 2.8)                    | 1.7 (1.1 to 2.5)       | 2.2 (1.5 to 3.5)       | 1.7 (1.1 to 2.4)       | 1.4 (0.9 to 2)         | 1.9 (1.3 to 2.9)       | -14.1 (-32.5 to 9)      | -17.4 (-39.8 to 9.3)  | -14.5 (-34.7 to 10.5) |
|       |          | DALYs      | 55 (42.1 to 72.1)                   | 52.3 (38.7 to 70.3)    | 58.5 (43.8 to 81)      | 54.5 (41.7 to 70.5)    | 48.4 (35.7 to 64.9)    | 59.7 (44.3 to 80)      | -0.8 (-18.6 to 19.3)    | -7.6 (-28.1 to 15.2)  | 2 (-19.5 to 27.3)     |
|       |          | YLLs       | 41.8 (30.1 to 58)                   | 37.9 (26.2 to 54.4)    | 46 (32.1 to 67.4)      | 32.4 (23.2 to 45.1)    | 27 (18.8 to 38.3)      | 37 (25.6 to 53.6)      | -22.4 (-39.8 to -1.4)   | -28.9 (-48.2 to -4.9) | -19.5 (-38.2 to 4.7)  |
|       |          | YLDs       | 13.2 (8.4 to 19.5)                  | 14.4 (8.9 to 21.5)     | 12.6 (7.8 to 18.5)     | 22.1 (14 to 31.6)      | 21.4 (13.3 to 32.4)    | 22.7 (14 to 33.2)      | 67.3 (43 to 94.9)       | 48.5 (18.7 to 81.4)   | 80.4 (44.1 to 123.1)  |

| Cause | Location                   | Measure    | Age-standardized rate (per 100,000) |                        |                        |                        |                      |                        | % Change (1990 to 2019) |                        |                        |
|-------|----------------------------|------------|-------------------------------------|------------------------|------------------------|------------------------|----------------------|------------------------|-------------------------|------------------------|------------------------|
|       |                            |            | 1990                                |                        |                        | 2019                   |                      |                        |                         |                        |                        |
|       |                            |            | Both                                | Female                 | Male                   | Both                   | Female               | Male                   | Both                    | Female                 | Male                   |
|       | Egypt                      | Incidence  | 7.8 (5.8 to 10.3)                   | 6.6 (4.5 to 9.6)       | 9 (6.6 to 11.5)        | 13.8 (10.3 to 17.9)    | 10.2 (7 to 14.7)     | 17.1 (12.7 to 21.6)    | 77 (68.5 to 86.8)       | 54.3 (47 to 61.9)      | 90.3 (78.7 to 104.1)   |
|       |                            | Prevalence | 181.5 (146.3 to 223.9)              | 175.6 (134.5 to 224.4) | 187.2 (147.1 to 231.5) | 285.4 (231.2 to 351.4) | 251 (192.9 to 321.6) | 315.4 (249.9 to 387.3) | 57.3 (48.9 to 65.6)     | 42.9 (35 to 51.9)      | 68.5 (56.5 to 81.6)    |
|       |                            | Deaths     | 2.3 (1.5 to 3.2)                    | 2.2 (1.1 to 3.4)       | 2.3 (1.5 to 3.4)       | 2.4 (1.3 to 3.8)       | 2.5 (1 to 4.2)       | 2.3 (1.4 to 3.9)       | 5.7 (-21.5 to 39.4)     | 12.3 (-24.5 to 48.9)   | 2.4 (-31.1 to 41.7)    |
|       |                            | DALYs      | 74.3 (52.3 to 98.1)                 | 79.7 (48 to 109.4)     | 69.4 (51 to 94.5)      | 78 (51.4 to 110.4)     | 79 (43.8 to 116.6)   | 77.6 (52.2 to 120.2)   | 4.9 (-15.5 to 30.4)     | -0.8 (-23 to 25.7)     | 11.8 (-13.8 to 41.6)   |
|       |                            | YLLs       | 61.3 (39.9 to 84.1)                 | 65 (34 to 94.2)        | 57.9 (40.6 to 82.7)    | 56.1 (31.1 to 86.9)    | 56.6 (23.1 to 93.3)  | 56.2 (32.7 to 94.7)    | -8.5 (-33 to 20.6)      | -12.9 (-41.2 to 18.1)  | -2.9 (-32.8 to 33)     |
|       |                            | YLDs       | 13 (8.5 to 18.4)                    | 14.7 (9.2 to 21.3)     | 11.5 (7.3 to 16.3)     | 21.9 (14.1 to 31.3)    | 22.3 (13.9 to 32.9)  | 21.3 (13.2 to 31.3)    | 67.9 (46.6 to 91.7)     | 52.4 (24.7 to 84.5)    | 86.1 (53 to 119.5)     |
|       | Iran (Islamic Republic of) | Incidence  | 10.5 (9.4 to 11.8)                  | 7.7 (6.8 to 8.8)       | 13.2 (11.8 to 14.7)    | 13.8 (12.4 to 15.4)    | 9.9 (8.8 to 11.3)    | 17.6 (15.8 to 19.5)    | 30.9 (27.7 to 34.4)     | 28.4 (24.1 to 32.5)    | 33.4 (30.1 to 37.1)    |
|       |                            | Prevalence | 241.2 (219.2 to 267)                | 206.2 (184.6 to 228.6) | 274.3 (249 to 304)     | 297.4 (269.7 to 327.7) | 250 (223.6 to 277.3) | 344 (313.6 to 380)     | 23.3 (21 to 26)         | 21.2 (18 to 24.5)      | 25.4 (22.6 to 28.4)    |
|       |                            | Deaths     | 1.5 (1.1 to 2)                      | 1.2 (0.9 to 1.6)       | 1.8 (1.4 to 2.5)       | 1.2 (0.9 to 1.5)       | 0.9 (0.7 to 1.3)     | 1.4 (1 to 1.8)         | -24.2 (-33.7 to -15.9)  | -23.5 (-42.3 to -11.5) | -25.3 (-34 to -12.6)   |
|       |                            | DALYs      | 58.7 (47.4 to 71.5)                 | 52 (41.3 to 64.3)      | 65 (51.7 to 80.1)      | 45.9 (37.4 to 55.1)    | 40.1 (32.3 to 48.8)  | 51.7 (41.4 to 62.9)    | -21.7 (-30.9 to -12.6)  | -22.9 (-33.4 to -12.4) | -20.4 (-29.8 to -9)    |
|       |                            | YLLs       | 43.8 (33.8 to 55.4)                 | 36.9 (27.3 to 47.8)    | 50.4 (37.9 to 65.3)    | 28.1 (22.1 to 35.5)    | 22.6 (17.4 to 29.1)  | 33.6 (26 to 42.7)      | -35.8 (-44.2 to -26.9)  | -38.8 (-48.7 to -27.8) | -33.3 (-42.2 to -20.8) |
|       |                            | YLDs       | 14.9 (10.1 to 19.9)                 | 15.1 (10.3 to 20.3)    | 14.6 (9.8 to 19.9)     | 17.8 (11.9 to 24.2)    | 17.5 (11.7 to 24)    | 18.1 (12 to 24.7)      | 19.7 (12.5 to 26.5)     | 16.1 (6.6 to 25.1)     | 23.9 (15.2 to 33.3)    |

| Cause | Location | Measure    | Age-standardized rate (per 100,000) |                        |                        |                        |                        |                        | % Change (1990 to 2019) |                       |                       |
|-------|----------|------------|-------------------------------------|------------------------|------------------------|------------------------|------------------------|------------------------|-------------------------|-----------------------|-----------------------|
|       |          |            | 1990                                |                        |                        | 2019                   |                        |                        |                         |                       |                       |
|       |          |            | Both                                | Female                 | Male                   | Both                   | Female                 | Male                   | Both                    | Female                | Male                  |
|       | Iraq     | Incidence  | 10 (7.2 to 13.2)                    | 7.8 (5.2 to 11.1)      | 12.1 (8.9 to 15.8)     | 15.4 (11.5 to 20.2)    | 10.9 (7.3 to 15.3)     | 19.9 (14.7 to 25.9)    | 54.6 (48 to 62.2)       | 39.6 (33.1 to 46.6)   | 63.9 (55.3 to 73.8)   |
|       |          | Prevalence | 223 (177.2 to 275.5)                | 205.1 (158 to 264.9)   | 240.9 (189.8 to 299.3) | 319.9 (253.4 to 396.8) | 272.9 (210.2 to 351.7) | 366.5 (290.2 to 456.4) | 43.5 (37.3 to 49.5)     | 33.1 (25.7 to 40.6)   | 52.2 (43.3 to 61.3)   |
|       |          | Deaths     | 2.7 (1.9 to 3.8)                    | 2.3 (1.5 to 3.6)       | 3.2 (2.2 to 4.6)       | 2.3 (1.6 to 3.3)       | 1.6 (1.1 to 2.4)       | 3.1 (2 to 4.6)         | -15.1 (-35.5 to 7.5)    | -28.4 (-48.4 to -0.2) | -3.7 (-30.2 to 29.4)  |
|       |          | DALYs      | 95 (71 to 125.4)                    | 90.8 (63.6 to 131.2)   | 100 (71.5 to 135.9)    | 82.5 (61.4 to 108.1)   | 69.9 (50.5 to 94)      | 96.2 (69.1 to 129.7)   | -13.2 (-31.2 to 8.1)    | -23 (-42.2 to 1.2)    | -3.8 (-25.3 to 23.2)  |
|       |          | YLLs       | 77.8 (55.2 to 107.4)                | 72.2 (46.6 to 113)     | 84.1 (57.4 to 118.7)   | 56.7 (37.7 to 80.5)    | 44.2 (27.9 to 65.6)    | 70.2 (46.2 to 104.7)   | -27.1 (-45.8 to -4.2)   | -38.8 (-57 to -12.9)  | -16.5 (-39.7 to 14)   |
|       |          | YLDs       | 17.2 (10.7 to 25)                   | 18.5 (11.5 to 27.6)    | 15.9 (9.5 to 23.5)     | 25.8 (16.1 to 37.1)    | 25.7 (15.3 to 37.7)    | 25.9 (15.6 to 37.4)    | 50.3 (28.1 to 75.1)     | 38.8 (11.1 to 71.8)   | 63.5 (32.9 to 101)    |
|       | Jordan   | Incidence  | 8.7 (6.6 to 11.4)                   | 7.1 (4.9 to 10.1)      | 10.2 (7.6 to 13.3)     | 14.6 (11.3 to 18.6)    | 10.3 (7.1 to 14.6)     | 18.4 (14 to 23.6)      | 68.2 (58.4 to 79.2)     | 45.1 (36.3 to 53.6)   | 80.5 (67 to 95.6)     |
|       |          | Prevalence | 202.2 (164.1 to 253.2)              | 187.9 (145.6 to 246.8) | 215.5 (172.6 to 268.6) | 298.6 (245.7 to 370.7) | 253.9 (194.5 to 333.3) | 338 (275.1 to 417.1)   | 47.7 (40.4 to 55.6)     | 35.1 (26.5 to 43.9)   | 56.9 (46.3 to 68)     |
|       |          | Deaths     | 2.7 (1.9 to 3.7)                    | 2.6 (1.8 to 3.7)       | 2.8 (2 to 3.9)         | 2.4 (1.7 to 3.3)       | 2.1 (1.4 to 3.1)       | 2.6 (1.8 to 3.8)       | -12.5 (-31.8 to 10.1)   | -19.5 (-44.6 to 7.2)  | -7.3 (-32.1 to 26)    |
|       |          | DALYs      | 82.7 (64.1 to 104.4)                | 83.4 (62.4 to 108.8)   | 82.4 (62.6 to 106.8)   | 76.9 (58.7 to 97.9)    | 70.6 (52.7 to 93)      | 82.5 (61.9 to 108.5)   | -7 (-24.3 to 13.6)      | -15.3 (-35.9 to 8.1)  | 0 (-22.9 to 29.2)     |
|       |          | YLLs       | 67.7 (49.8 to 90.1)                 | 66.7 (46.8 to 91.9)    | 69 (50.3 to 93.2)      | 54.3 (40 to 74.6)      | 47.5 (33 to 67.2)      | 60.2 (42.4 to 84.9)    | -19.8 (-37.9 to 1.9)    | -28.9 (-50.7 to -2.4) | -12.7 (-36.1 to 17.2) |
|       |          | YLDs       | 15 (9.8 to 22.4)                    | 16.6 (10.6 to 24.9)    | 13.4 (8.3 to 20.8)     | 22.6 (14.3 to 34.2)    | 23.1 (14.5 to 34.8)    | 22.2 (13.5 to 34.2)    | 51.1 (29.9 to 76.2)     | 38.8 (12.5 to 71.1)   | 65.3 (33.7 to 101.9)  |

| Cause | Location | Measure    | Age-standardized rate (per 100,000) |                        |                        |                      |                        |                        | % Change (1990 to 2019) |                        |                        |
|-------|----------|------------|-------------------------------------|------------------------|------------------------|----------------------|------------------------|------------------------|-------------------------|------------------------|------------------------|
|       |          |            | 1990                                |                        |                        | 2019                 |                        |                        |                         |                        |                        |
|       |          |            | Both                                | Female                 | Male                   | Both                 | Female                 | Male                   | Both                    | Female                 | Male                   |
|       | Kuwait   | Incidence  | 9.6 (7.3 to 12.5)                   | 7.7 (5.1 to 11.1)      | 10.7 (8.1 to 13.8)     | 13.4 (10.1 to 17.3)  | 9.8 (6.4 to 14.2)      | 16.2 (12.3 to 20.8)    | 39.6 (29.2 to 50.7)     | 27.3 (18.5 to 37.3)    | 50.6 (37.5 to 64.9)    |
|       |          | Prevalence | 210.9 (169.5 to 260.9)              | 198.5 (148.8 to 257.7) | 219.3 (176.4 to 270.5) | 279.8 (222.6 to 348) | 244.4 (181.1 to 320.2) | 306.9 (242.8 to 380.5) | 32.7 (24.8 to 41.8)     | 23.1 (15 to 32.4)      | 40 (29.8 to 51.7)      |
|       |          | Deaths     | 1.5 (1.1 to 2.1)                    | 1.5 (1 to 2.1)         | 1.6 (1.2 to 2.2)       | 0.9 (0.6 to 1.2)     | 0.7 (0.5 to 1.1)       | 1 (0.7 to 1.4)         | -44.6 (-54.5 to -32.9)  | -51.8 (-63.1 to -33.5) | -41.4 (-53.7 to -27.1) |
|       |          | DALYs      | 54 (43.1 to 67.2)                   | 56 (43.3 to 71.1)      | 53 (41.4 to 67.4)      | 38.2 (29.1 to 49.2)  | 36.9 (27.3 to 49.8)    | 38.6 (28.8 to 51.2)    | -29.2 (-40.7 to -15.6)  | -34.1 (-47.5 to -18.1) | -27.1 (-41.3 to -10.9) |
|       |          | YLLs       | 39.8 (30.6 to 52.2)                 | 39.7 (28.8 to 52.7)    | 40.2 (30.3 to 53)      | 18.5 (13.6 to 25.2)  | 16.6 (11.4 to 23.8)    | 19.7 (14.1 to 27.9)    | -53.5 (-61.4 to -43.3)  | -58.1 (-67.6 to -43.2) | -51 (-61.4 to -37.8)   |
|       |          | YLDs       | 14.2 (9.2 to 20.6)                  | 16.3 (10.2 to 24)      | 12.8 (7.9 to 18.7)     | 19.7 (12.4 to 29.4)  | 20.3 (12.3 to 31)      | 18.9 (11.5 to 28.8)    | 38.8 (17.4 to 62.9)     | 24.8 (2 to 54.8)       | 48.4 (17.4 to 86.1)    |
|       | Lebanon  | Incidence  | 8.1 (6.1 to 10.8)                   | 6.6 (4.4 to 9.5)       | 9.6 (7.3 to 12.7)      | 13.9 (10.8 to 18.3)  | 10.2 (6.9 to 14.6)     | 18.1 (14.2 to 23.3)    | 71.9 (63.2 to 81)       | 55.6 (46.6 to 65.5)    | 87.6 (75.5 to 101.5)   |
|       |          | Prevalence | 195.9 (155.6 to 243.7)              | 182.7 (139.9 to 236.1) | 208.9 (165.7 to 262.3) | 295.9 (238.7 to 370) | 258.3 (197.2 to 332.7) | 338.1 (271.8 to 422.6) | 51.1 (43.3 to 59.1)     | 41.4 (31.8 to 51.5)    | 61.8 (50.9 to 72.9)    |
|       |          | Deaths     | 1.8 (1.3 to 2.6)                    | 1.6 (1.1 to 2.3)       | 2.2 (1.5 to 3.1)       | 1.3 (0.8 to 1.9)     | 1.1 (0.7 to 1.6)       | 1.5 (0.8 to 2.5)       | -30.6 (-51.2 to -5.8)   | -31.4 (-52.4 to -9.9)  | -28.9 (-55.6 to 13.9)  |
|       |          | DALYs      | 60.7 (46.8 to 78)                   | 57.5 (42.5 to 75.8)    | 64.3 (48.5 to 85)      | 51 (38.3 to 67.8)    | 47.5 (34.6 to 62.8)    | 55.7 (39.1 to 79.9)    | -16 (-33.8 to 4.6)      | -17.4 (-36.8 to 3.8)   | -13.4 (-35.6 to 21.1)  |
|       |          | YLLs       | 47.4 (34.3 to 64.5)                 | 43 (29.4 to 60.6)      | 52.2 (37.1 to 73.5)    | 30.6 (21 to 44.1)    | 27 (17.1 to 37.9)      | 35.1 (21.1 to 55.7)    | -35.5 (-54.1 to -12.1)  | -37.3 (-56.7 to -15.8) | -32.8 (-55.9 to 5.1)   |
|       |          | YLDs       | 13.3 (8.6 to 19.4)                  | 14.5 (8.9 to 21.5)     | 12.1 (7.7 to 18.1)     | 20.4 (12.8 to 29.9)  | 20.5 (12.5 to 31.6)    | 20.6 (12.7 to 30.5)    | 53.5 (31.4 to 77.9)     | 41.9 (15.4 to 74)      | 70 (37 to 111.2)       |

| Cause | Location | Measure    | Age-standardized rate (per 100,000) |                     |                        |                        |                        |                        | % Change (1990 to 2019) |                      |                        |
|-------|----------|------------|-------------------------------------|---------------------|------------------------|------------------------|------------------------|------------------------|-------------------------|----------------------|------------------------|
|       |          |            | 1990                                |                     |                        | 2019                   |                        |                        |                         |                      |                        |
|       |          |            | Both                                | Female              | Male                   | Both                   | Female                 | Male                   | Both                    | Female               | Male                   |
|       | Libya    | Incidence  | 8.5 (6.4 to 11.3)                   | 6.7 (4.6 to 9.8)    | 10.1 (7.5 to 13.1)     | 13.3 (10 to 17.4)      | 9.9 (6.8 to 14.2)      | 16.6 (12.4 to 21.5)    | 56.2 (49.5 to 63.3)     | 47.4 (40.2 to 55.2)  | 64.6 (55.5 to 75.2)    |
|       |          | Prevalence | 195.1 (155.5 to 244.9)              | 179 (136.8 to 233)  | 209.4 (165.2 to 262.6) | 278.5 (222.7 to 350.3) | 243.9 (186.4 to 316.6) | 311.5 (247.1 to 387.7) | 42.8 (36.5 to 49.4)     | 36.3 (28.7 to 45.1)  | 48.7 (39.9 to 58.7)    |
|       |          | Deaths     | 1.8 (1.2 to 2.5)                    | 1.6 (1 to 2.4)      | 1.9 (1.2 to 2.9)       | 1.7 (1.1 to 2.7)       | 1.6 (0.9 to 2.6)       | 1.8 (1.1 to 3.1)       | -2.3 (-29.1 to 33.8)    | 1.2 (-30.8 to 36.4)  | -5.3 (-34.3 to 39.2)   |
|       |          | DALYs      | 61 (44.8 to 79.9)                   | 61.5 (43.7 to 83.7) | 60.8 (43.5 to 84)      | 64 (45.3 to 87.6)      | 64.6 (42.4 to 90.2)    | 63.5 (44.5 to 94.9)    | 5 (-17.1 to 33.3)       | 5.1 (-18.9 to 32.4)  | 4.4 (-21.7 to 41)      |
|       |          | YLLs       | 47.7 (32.9 to 65.7)                 | 46.9 (30.5 to 66.9) | 48.5 (32.5 to 70.3)    | 43.8 (27.6 to 64.5)    | 43.7 (25 to 65.5)      | 44 (27.7 to 72.7)      | -8 (-33 to 26.5)        | -6.8 (-36.5 to 26.9) | -9.3 (-36.5 to 33.2)   |
|       |          | YLDs       | 13.3 (8.4 to 19.6)                  | 14.6 (9 to 22)      | 12.3 (7.8 to 18.5)     | 20.2 (12.8 to 29.9)    | 20.9 (12.9 to 31.4)    | 19.5 (11.9 to 29.7)    | 51.5 (31.1 to 77.6)     | 43.5 (15.5 to 79.6)  | 58.5 (29.5 to 94.7)    |
|       | Morocco  | Incidence  | 6.5 (4.9 to 8.9)                    | 5.4 (3.5 to 7.8)    | 7.7 (5.8 to 10.3)      | 13.3 (10 to 17.7)      | 9.9 (6.5 to 14.4)      | 16.7 (12.7 to 21.9)    | 103 (94 to 113.3)       | 84.2 (74.4 to 94.4)  | 115.4 (102.7 to 128.3) |
|       |          | Prevalence | 163.2 (128.1 to 206.2)              | 155 (115 to 202.5)  | 171.5 (133.2 to 217.2) | 286.6 (226.1 to 362.3) | 252.4 (189.1 to 332.5) | 320.8 (248.7 to 403)   | 75.6 (63.5 to 87.3)     | 62.9 (49.8 to 75.9)  | 87 (71.2 to 102.8)     |
|       |          | Deaths     | 1.4 (1 to 2.1)                      | 1.2 (0.8 to 1.7)    | 1.7 (1.1 to 2.6)       | 1.6 (1 to 2.3)         | 1.4 (0.9 to 2)         | 1.8 (1.1 to 2.8)       | 11.4 (-15.7 to 39.2)    | 18.3 (-19.5 to 59.7) | 4.6 (-23.3 to 37.8)    |
|       |          | DALYs      | 50.6 (39 to 64.4)                   | 48.9 (36.1 to 63.9) | 52.6 (39.2 to 70.7)    | 60.5 (44 to 78.2)      | 60.4 (43.7 to 80.6)    | 60.8 (42.7 to 82.6)    | 19.5 (-4.3 to 43.3)     | 23.4 (-7.3 to 57.2)  | 15.6 (-10.1 to 45.3)   |
|       |          | YLLs       | 39.1 (28.4 to 51.8)                 | 36.1 (24.9 to 49.9) | 42.3 (29.6 to 59.8)    | 38 (25.4 to 53.2)      | 37 (23.5 to 54)        | 39.3 (25.1 to 58.3)    | -2.6 (-27 to 26.3)      | 2.4 (-32.5 to 42.8)  | -7.2 (-33 to 22.3)     |
|       |          | YLDs       | 11.6 (7.2 to 16.9)                  | 12.8 (7.8 to 19.6)  | 10.3 (6.3 to 15.3)     | 22.5 (14.1 to 33.1)    | 23.4 (14 to 35.2)      | 21.5 (13.2 to 32.4)    | 94.1 (66.7 to 123.3)    | 82.3 (45.5 to 123.4) | 109.5 (74.1 to 149.1)  |

| Cause | Location  | Measure    | Age-standardized rate (per 100,000) |                        |                        |                        |                      |                        | % Change (1990 to 2019) |                        |                       |
|-------|-----------|------------|-------------------------------------|------------------------|------------------------|------------------------|----------------------|------------------------|-------------------------|------------------------|-----------------------|
|       |           |            | 1990                                |                        |                        | 2019                   |                      |                        |                         |                        |                       |
|       |           |            | Both                                | Female                 | Male                   | Both                   | Female               | Male                   | Both                    | Female                 | Male                  |
|       | Oman      | Incidence  | 6.5 (4.9 to 8.6)                    | 5 (3.4 to 7.2)         | 7.5 (5.7 to 9.8)       | 12.6 (9.7 to 16.3)     | 8.7 (5.9 to 12.4)    | 15.2 (11.7 to 19.5)    | 94.7 (83 to 108.3)      | 73.4 (62.5 to 85.2)    | 101.4 (87.3 to 117.6) |
|       |           | Prevalence | 161.2 (129.3 to 199.8)              | 150.2 (114.4 to 196.3) | 170.7 (136.6 to 213.3) | 264 (212.8 to 323.4)   | 227 (174.5 to 295.1) | 291.2 (234 to 357.7)   | 63.8 (53.4 to 75.7)     | 51.1 (39.6 to 62.4)    | 70.6 (56.9 to 85.1)   |
|       |           | Deaths     | 0.9 (0.6 to 1.3)                    | 0.8 (0.5 to 1.1)       | 1.1 (0.7 to 1.8)       | 1 (0.7 to 1.4)         | 0.8 (0.5 to 1.2)     | 1.2 (0.8 to 1.8)       | 8 (-22.9 to 50.5)       | 7.6 (-24.5 to 51.7)    | 4 (-33.7 to 56.1)     |
|       |           | DALYs      | 31.6 (23.8 to 42.1)                 | 31.3 (23.5 to 41.7)    | 33.5 (24.9 to 46.8)    | 38.4 (29.5 to 49.4)    | 37.8 (28.1 to 50)    | 40.5 (30.4 to 53.6)    | 21.5 (-3.1 to 48.6)     | 20.5 (-5.8 to 48.9)    | 20.7 (-10.5 to 54.3)  |
|       |           | YLLs       | 20.4 (13.5 to 29.8)                 | 19.2 (12.8 to 28.4)    | 22.7 (14.5 to 34.8)    | 18.5 (13.4 to 25.3)    | 17.7 (12.6 to 24.2)  | 20.2 (13.9 to 29.1)    | -9.3 (-33.5 to 24)      | -7.5 (-33.6 to 30.2)   | -11.3 (-40 to 30.4)   |
|       |           | YLDs       | 11.2 (7.3 to 16)                    | 12.1 (7.6 to 18.3)     | 10.8 (7 to 15.7)       | 19.9 (12.7 to 28.9)    | 20 (12.1 to 29.7)    | 20.3 (12.9 to 30.9)    | 77.7 (53.8 to 104)      | 64.8 (34.6 to 102.5)   | 88.1 (55.7 to 122)    |
|       | Palestine | Incidence  | 10.1 (7.4 to 13.5)                  | 7.5 (4.9 to 11.1)      | 12.9 (9.4 to 17.3)     | 14.4 (10.7 to 19)      | 9.8 (6.6 to 14.4)    | 19 (14.2 to 24.8)      | 43.3 (35.3 to 52.5)     | 30.7 (23.1 to 38.4)    | 47.3 (36.9 to 58.2)   |
|       |           | Prevalence | 229.4 (182.5 to 289.4)              | 200 (152.4 to 263.3)   | 261 (202.5 to 332.2)   | 301.9 (242.6 to 379.6) | 248.7 (189 to 324.7) | 355.4 (279.1 to 447.5) | 31.6 (25.7 to 38.1)     | 24.4 (17.8 to 30.8)    | 36.1 (27.6 to 45)     |
|       |           | Deaths     | 2.7 (1.9 to 3.8)                    | 2.2 (1.5 to 3.2)       | 3.4 (2.3 to 4.9)       | 1.8 (1.3 to 2.5)       | 1.4 (1 to 1.9)       | 2.4 (1.7 to 3.4)       | -33.2 (-48.6 to -13.2)  | -35.9 (-51.3 to -14.7) | -29.6 (-47.1 to -8.2) |
|       |           | DALYs      | 90.5 (67.2 to 120.2)                | 83.2 (60.8 to 112.2)   | 100.6 (73 to 138.9)    | 67.9 (53.6 to 85.7)    | 59 (45.4 to 75.1)    | 78.2 (60.1 to 100.3)   | -25 (-39.2 to -8.4)     | -29.1 (-43.8 to -10.2) | -22.2 (-38.3 to -2)   |
|       |           | YLLs       | 74.4 (53 to 103.9)                  | 66.6 (45.9 to 95.5)    | 84.8 (58.3 to 121.9)   | 45.5 (33.9 to 60)      | 37.4 (27.3 to 49.3)  | 55.2 (39.9 to 76)      | -38.7 (-52.2 to -20.6)  | -43.9 (-57.4 to -25.6) | -35 (-49.9 to -13.2)  |
|       |           | YLDs       | 16.2 (10.5 to 23.6)                 | 16.6 (10.6 to 24.2)    | 15.8 (10 to 23.3)      | 22.3 (14.7 to 32.3)    | 21.6 (13.4 to 33)    | 23.1 (14.9 to 34.2)    | 38.1 (18.3 to 59.8)     | 29.9 (5.1 to 58.8)     | 46.3 (16 to 82.1)     |



| Cause | Location     | Measure    | Age-standardized rate (per 100,000) |                        |                        |                        |                        |                        | % Change (1990 to 2019) |                       |                       |
|-------|--------------|------------|-------------------------------------|------------------------|------------------------|------------------------|------------------------|------------------------|-------------------------|-----------------------|-----------------------|
|       |              |            | 1990                                |                        |                        | 2019                   |                        |                        |                         |                       |                       |
|       |              |            | Both                                | Female                 | Male                   | Both                   | Female                 | Male                   | Both                    | Female                | Male                  |
|       | Qatar        | Incidence  | 9 (6.8 to 11.4)                     | 7 (4.9 to 9.8)         | 10 (7.5 to 12.9)       | 16.1 (12.2 to 20.4)    | 10.5 (7.2 to 14.9)     | 18.2 (13.7 to 23.3)    | 79.3 (69.1 to 90)       | 49.6 (40.2 to 59.5)   | 81.4 (69.3 to 92.9)   |
|       |              | Prevalence | 201.1 (163.1 to 247.4)              | 187.2 (144.9 to 241.6) | 211 (167 to 261)       | 314.5 (253.7 to 385.5) | 260.8 (200 to 333.4)   | 336.3 (266.3 to 415.1) | 56.4 (46.1 to 66.8)     | 39.3 (29.7 to 50)     | 59.4 (47.9 to 72.3)   |
|       |              | Deaths     | 2.3 (1.5 to 4)                      | 2.3 (1.3 to 4.5)       | 2.5 (1.5 to 4.2)       | 2.1 (1.3 to 3.3)       | 2.6 (1.6 to 4.1)       | 2 (1.2 to 3)           | -7.8 (-41.5 to 30.1)    | 13.3 (-38.4 to 67.2)  | -21 (-45.4 to 12.1)   |
|       |              | DALYs      | 60.7 (44.8 to 88.4)                 | 66 (46.5 to 104.8)     | 60.2 (43.3 to 87.7)    | 56.6 (41.8 to 74.2)    | 65.9 (47.1 to 89.2)    | 53.5 (39.2 to 70.6)    | -6.7 (-29.7 to 19.2)    | -0.1 (-32.4 to 31.9)  | -11.1 (-33.1 to 15.4) |
|       |              | YLLs       | 46.6 (31.9 to 71.8)                 | 49.8 (31.6 to 88.6)    | 46.8 (31.6 to 72.9)    | 33.5 (22.3 to 49.2)    | 41.7 (26.9 to 62.1)    | 30.6 (20.2 to 46.2)    | -28 (-50.7 to 1)        | -16.1 (-48.5 to 22.8) | -34.5 (-53.8 to -6.6) |
|       |              | YLDs       | 14.1 (8.9 to 20.7)                  | 16.2 (10.1 to 24.9)    | 13.4 (8 to 19.9)       | 23.1 (14.2 to 33.8)    | 24.1 (14.5 to 36.9)    | 22.9 (13.9 to 34)      | 63.4 (38.2 to 94.5)     | 48.9 (19.5 to 84.5)   | 70.9 (38.2 to 115.1)  |
|       | Saudi Arabia | Incidence  | 9.8 (7.5 to 12.8)                   | 7.6 (5.2 to 10.6)      | 11.4 (8.7 to 14.8)     | 18.8 (14.5 to 23.9)    | 13.5 (9.1 to 18.9)     | 22.3 (17.1 to 28.6)    | 90.7 (80.2 to 103.4)    | 77.3 (65 to 91.8)     | 96.1 (82.3 to 111)    |
|       |              | Prevalence | 211.3 (171.1 to 256.6)              | 193.6 (148.2 to 243.8) | 224.8 (179.8 to 274.7) | 358.3 (290.2 to 432.2) | 311.1 (236.1 to 394.9) | 391.1 (311.5 to 478.4) | 69.6 (59.5 to 80.7)     | 60.7 (49 to 73.5)     | 74 (61.8 to 87.8)     |
|       |              | Deaths     | 2.9 (2 to 4.1)                      | 2.3 (1.5 to 3.3)       | 3.5 (2.2 to 5.1)       | 3 (2.1 to 4.3)         | 2.6 (1.7 to 3.8)       | 3.4 (2.2 to 4.9)       | 4.4 (-26.5 to 44.9)     | 14.7 (-23.7 to 60.6)  | -3.3 (-35.1 to 42.8)  |
|       |              | DALYs      | 89.8 (65.6 to 120.8)                | 81.5 (59.1 to 111.3)   | 96.7 (68.5 to 135.5)   | 98.1 (74.7 to 129.3)   | 94.9 (68.7 to 127)     | 100.3 (73.8 to 135.8)  | 9.3 (-18.4 to 43.9)     | 16.3 (-16.6 to 54.8)  | 3.8 (-24.3 to 45)     |
|       |              | YLLs       | 74.8 (50.4 to 106.3)                | 65.3 (44 to 94.8)      | 82.5 (54 to 121.1)     | 71.5 (50.5 to 100.5)   | 67.1 (44.9 to 98.3)    | 74.5 (50.8 to 109.5)   | -4.4 (-32.1 to 34.7)    | 2.7 (-32.5 to 48.4)   | -9.7 (-38.5 to 33.2)  |
|       |              | YLDs       | 15 (9.7 to 21.9)                    | 16.2 (10.2 to 23.7)    | 14.2 (8.8 to 21.1)     | 26.6 (17.4 to 38.9)    | 27.8 (17.4 to 42)      | 25.9 (16.1 to 38.5)    | 78.1 (52.6 to 106.5)    | 71.2 (37.2 to 110.3)  | 82.4 (48.8 to 125.3)  |

| Cause | Location             | Measure    | Age-standardized rate (per 100,000) |                        |                        |                        |                        |                        | % Change (1990 to 2019) |                        |                        |
|-------|----------------------|------------|-------------------------------------|------------------------|------------------------|------------------------|------------------------|------------------------|-------------------------|------------------------|------------------------|
|       |                      |            | 1990                                |                        |                        | 2019                   |                        |                        |                         |                        |                        |
|       |                      |            | Both                                | Female                 | Male                   | Both                   | Female                 | Male                   | Both                    | Female                 | Male                   |
|       | Sudan                | Incidence  | 6.4 (4.7 to 8.5)                    | 4.9 (3.3 to 7.1)       | 7.8 (5.7 to 10.2)      | 11 (8.2 to 14.5)       | 7.8 (5.3 to 11.3)      | 14 (10.4 to 18.3)      | 72.1 (64.3 to 80.8)     | 59 (49.8 to 68.6)      | 78.8 (67.9 to 89.7)    |
|       |                      | Prevalence | 156.4 (127 to 194.5)                | 144.1 (109.8 to 185.5) | 168 (135.1 to 211.4)   | 239.7 (195.1 to 298.1) | 207.5 (158.4 to 265.2) | 268.7 (216.7 to 339.4) | 53.3 (44.4 to 62.1)     | 44 (33.9 to 55.5)      | 59.9 (49.3 to 72.1)    |
|       |                      | Deaths     | 2.3 (1.6 to 3.4)                    | 1.9 (1.3 to 3)         | 2.7 (1.8 to 4.1)       | 2.1 (1.3 to 3.6)       | 1.7 (1.1 to 2.7)       | 2.4 (1.3 to 4.6)       | -8.4 (-38.9 to 39)      | -10.2 (-48.2 to 27)    | -8.8 (-39.7 to 54.4)   |
|       |                      | DALYs      | 80.8 (58.9 to 108.8)                | 78.2 (52.5 to 116.8)   | 83.1 (59.5 to 112.2)   | 74.3 (50.4 to 111.8)   | 68.3 (46.5 to 95.1)    | 79.3 (51.1 to 132.2)   | -8 (-35.6 to 31.5)      | -12.7 (-46.7 to 21)    | -4.6 (-33.7 to 50.2)   |
|       |                      | YLLs       | 70.2 (47.8 to 98.3)                 | 66.8 (42.3 to 105.6)   | 73.2 (50.2 to 101.6)   | 56.6 (35.2 to 91.9)    | 50.1 (30.1 to 75.3)    | 62.1 (36.1 to 114.2)   | -19.4 (-48.8 to 25.2)   | -25 (-59.2 to 11.8)    | -15.3 (-46.3 to 46.9)  |
|       |                      | YLDs       | 10.7 (7 to 15.3)                    | 11.4 (7 to 17.2)       | 9.9 (6.3 to 14)        | 17.8 (11.3 to 25.8)    | 18.2 (11.1 to 27.5)    | 17.2 (10.7 to 25.3)    | 66.9 (46.4 to 90.1)     | 59.7 (32.4 to 93.2)    | 74.8 (47 to 106.1)     |
|       | Syrian Arab Republic | Incidence  | 9.8 (7 to 13.4)                     | 7.6 (5 to 11.2)        | 11.8 (8.4 to 15.8)     | 13 (9.8 to 17.1)       | 9.4 (6.4 to 13.6)      | 16.6 (12.4 to 21.6)    | 32.8 (23.7 to 44.8)     | 24.2 (15.9 to 34.3)    | 40.4 (28.7 to 54.2)    |
|       |                      | Prevalence | 227 (177.1 to 289.5)                | 203.8 (152.1 to 266.1) | 248.8 (193.6 to 318.6) | 275.7 (220.5 to 344.9) | 237.3 (180.3 to 306.7) | 314.7 (247.3 to 396.8) | 21.5 (15.9 to 27.4)     | 16.5 (10.4 to 22.8)    | 26.5 (18.7 to 35.6)    |
|       |                      | Deaths     | 2.5 (1.8 to 3.5)                    | 2.2 (1.5 to 3)         | 2.8 (1.9 to 4)         | 1.7 (1.1 to 2.4)       | 1.5 (1 to 2.2)         | 1.8 (1.2 to 2.6)       | -33.5 (-52.6 to -8.9)   | -28.5 (-49.6 to -0.6)  | -36 (-56.2 to -7.7)    |
|       |                      | DALYs      | 96.8 (73 to 125.1)                  | 90.4 (68.4 to 119)     | 102.5 (75.9 to 134.6)  | 64 (47.8 to 82.6)      | 60.7 (45.2 to 79)      | 67 (48.9 to 87.6)      | -33.9 (-49.7 to -14.8)  | -32.9 (-49.4 to -11)   | -34.6 (-51.3 to -12.7) |
|       |                      | YLLs       | 80.5 (58 to 109)                    | 72.8 (51.7 to 102.4)   | 87.6 (61.4 to 120.4)   | 44.1 (31 to 61.8)      | 40.6 (27.9 to 57.1)    | 47.8 (32.9 to 68.7)    | -45.2 (-60.3 to -23.3)  | -44.2 (-60.6 to -17.2) | -45.5 (-61.6 to -21.3) |
|       |                      | YLDs       | 16.3 (10.3 to 24.1)                 | 17.7 (10.7 to 26.9)    | 14.9 (9.4 to 22.6)     | 19.8 (12.6 to 29.8)    | 20.1 (12.5 to 30.8)    | 19.3 (12.3 to 29.1)    | 21.8 (3.1 to 41.2)      | 13.8 (-8.4 to 39.4)    | 28.8 (1.6 to 61.7)     |

| Cause | Location | Measure    | Age-standardized rate (per 100,000) |                        |                        |                        |                        |                        | % Change (1990 to 2019) |                        |                        |
|-------|----------|------------|-------------------------------------|------------------------|------------------------|------------------------|------------------------|------------------------|-------------------------|------------------------|------------------------|
|       |          |            | 1990                                |                        |                        | 2019                   |                        |                        |                         |                        |                        |
|       |          |            | Both                                | Female                 | Male                   | Both                   | Female                 | Male                   | Both                    | Female                 | Male                   |
|       | Tunisia  | Incidence  | 7.2 (5.3 to 9.4)                    | 5.7 (3.8 to 8.2)       | 8.7 (6.4 to 11.3)      | 12.4 (9.2 to 15.8)     | 8.8 (5.9 to 12.6)      | 16 (12 to 20.3)        | 71.5 (63.4 to 81)       | 54.7 (45.3 to 65.6)    | 83.9 (72.8 to 96.5)    |
|       |          | Prevalence | 177.3 (141.9 to 218.1)              | 163 (123.6 to 212.6)   | 190.8 (150.9 to 235.5) | 265.1 (214 to 327.8)   | 224.5 (169.6 to 290.2) | 306.2 (243 to 377.3)   | 49.5 (41.7 to 57.6)     | 37.7 (28.8 to 47.4)    | 60.5 (49.9 to 71.7)    |
|       |          | Deaths     | 1.6 (1.2 to 2.3)                    | 1.4 (1 to 2)           | 1.9 (1.3 to 2.8)       | 1.5 (0.9 to 2.3)       | 1.2 (0.7 to 2)         | 1.8 (1.1 to 2.8)       | -8.5 (-36.6 to 25.1)    | -9.9 (-38.7 to 25.5)   | -6.3 (-36.9 to 33.8)   |
|       |          | DALYs      | 55.9 (43.9 to 69.9)                 | 53.6 (41.1 to 68.6)    | 58.2 (44.3 to 75.1)    | 54.3 (39.9 to 73.2)    | 48.9 (34.6 to 66.7)    | 60.2 (42.7 to 82.6)    | -2.8 (-22.4 to 21.5)    | -8.8 (-29.7 to 15.5)   | 3.5 (-21 to 35.4)      |
|       |          | YLLs       | 43.3 (32.4 to 58.2)                 | 40.3 (29.4 to 54)      | 46.3 (33.1 to 64.6)    | 35 (22.8 to 51.4)      | 30 (18.5 to 44.4)      | 40.4 (25.4 to 61.1)    | -19.2 (-43 to 10.9)     | -25.6 (-51 to 5.2)     | -12.6 (-39.3 to 25)    |
|       |          | YLDs       | 12.6 (8.3 to 18.1)                  | 13.3 (8.2 to 19.4)     | 11.9 (7.7 to 17.4)     | 19.3 (12.5 to 28)      | 18.9 (11.5 to 28.1)    | 19.7 (12.5 to 29.2)    | 53.1 (33.9 to 76.6)     | 41.9 (15.7 to 72.8)    | 65.9 (37.8 to 101)     |
|       | Turkey   | Incidence  | 6.9 (5.2 to 9.3)                    | 4.9 (3.3 to 7.3)       | 9 (6.7 to 11.7)        | 11.6 (9 to 15.1)       | 7.8 (5.4 to 11.3)      | 15.6 (12 to 19.8)      | 68.4 (55.8 to 83)       | 59.8 (46.6 to 75.1)    | 73.6 (59 to 91.5)      |
|       |          | Prevalence | 173.1 (140.2 to 215.9)              | 150.1 (113.5 to 195.6) | 196.5 (156.5 to 245.8) | 248.7 (203.5 to 307.5) | 205.3 (158.8 to 264.9) | 293.5 (237.2 to 364.6) | 43.7 (35.8 to 53.2)     | 36.8 (27.1 to 47.8)    | 49.4 (38.4 to 61.6)    |
|       |          | Deaths     | 1.9 (1.3 to 2.8)                    | 1.4 (0.9 to 2.2)       | 2.4 (1.5 to 3.8)       | 1.1 (0.8 to 1.6)       | 0.9 (0.6 to 1.3)       | 1.4 (0.9 to 2)         | -39.6 (-58.6 to -19.8)  | -34.8 (-58.4 to -12.6) | -42.9 (-62.4 to -17.3) |
|       |          | DALYs      | 66.7 (50.7 to 86)                   | 57.2 (42.3 to 76.5)    | 77.2 (57 to 103.1)     | 44 (33.2 to 55.7)      | 38.7 (29.5 to 50.4)    | 49.9 (37 to 64.5)      | -34 (-49.7 to -18.6)    | -32.3 (-50.3 to -13.4) | -35.4 (-52.1 to -16.1) |
|       |          | YLLs       | 54.4 (39.3 to 72.8)                 | 44.9 (30.6 to 64.5)    | 64.9 (45 to 90.5)      | 26.2 (18.4 to 35.5)    | 21.6 (14.8 to 29.4)    | 31.2 (21.6 to 43)      | -51.9 (-64.9 to -36.9)  | -52 (-67.1 to -35.4)   | -51.9 (-65.6 to -33)   |
|       |          | YLDs       | 12.3 (7.9 to 18.1)                  | 12.3 (7.7 to 19)       | 12.4 (7.8 to 18.1)     | 17.9 (11.2 to 26.1)    | 17.2 (10.5 to 25.8)    | 18.7 (11.5 to 28.1)    | 45 (24.8 to 66.7)       | 39.5 (13.7 to 71.3)    | 50.9 (25 to 85.2)      |

| Cause | Location             | Measure    | Age-standardized rate (per 100,000) |                        |                      |                        |                        |                        | % Change (1990 to 2019) |                       |                       |
|-------|----------------------|------------|-------------------------------------|------------------------|----------------------|------------------------|------------------------|------------------------|-------------------------|-----------------------|-----------------------|
|       |                      |            | 1990                                |                        |                      | 2019                   |                        |                        |                         |                       |                       |
|       |                      |            | Both                                | Female                 | Male                 | Both                   | Female                 | Male                   | Both                    | Female                | Male                  |
|       | United Arab Emirates | Incidence  | 11.1 (8.4 to 14.2)                  | 7.7 (5.2 to 10.9)      | 13 (9.6 to 16.7)     | 17.7 (13.4 to 22.5)    | 11.1 (7.4 to 15.7)     | 20.6 (15.3 to 26.5)    | 59.3 (51.2 to 67.5)     | 43.8 (37.2 to 51.1)   | 58.7 (49.7 to 67.9)   |
|       |                      | Prevalence | 234.6 (189.6 to 288.7)              | 199 (153.2 to 255.7)   | 255.7 (204.7 to 316) | 337.2 (273 to 413.9)   | 265.5 (205.8 to 341.5) | 372 (296.8 to 459.4)   | 43.7 (37 to 50.8)       | 33.4 (25.4 to 41.3)   | 45.5 (37.2 to 54.2)   |
|       |                      | Deaths     | 3.5 (2.3 to 4.9)                    | 2.9 (1.8 to 4.5)       | 3.9 (2.3 to 5.7)     | 2.9 (1.7 to 4.8)       | 2.4 (1.2 to 3.6)       | 3 (1.8 to 5.7)         | -18.3 (-44.4 to 19.8)   | -17.7 (-53 to 19.8)   | -22 (-48.2 to 24.7)   |
|       |                      | DALYs      | 106 (77.6 to 140.1)                 | 92.7 (63.7 to 128.8)   | 114.4 (79.5 to 156)  | 98 (69 to 145.7)       | 85 (55.3 to 117.7)     | 103.2 (68.4 to 166.3)  | -7.6 (-33.1 to 28.4)    | -8.3 (-41.7 to 26.2)  | -9.8 (-37.2 to 32.9)  |
|       |                      | YLLs       | 89.4 (61.7 to 122.8)                | 75.3 (47.1 to 111.7)   | 98.1 (64.1 to 138.9) | 73.5 (46.5 to 120.2)   | 61.6 (33.7 to 92.5)    | 78.2 (46.8 to 139.7)   | -17.8 (-45 to 24.3)     | -18.2 (-55.2 to 23.2) | -20.3 (-49.4 to 27.9) |
|       |                      | YLDs       | 16.6 (10.3 to 23.9)                 | 17.4 (10.9 to 25.6)    | 16.4 (9.8 to 24)     | 24.5 (15.2 to 35.3)    | 23.4 (13.9 to 34.4)    | 25 (15.4 to 36.9)      | 47.7 (24.8 to 75.8)     | 34.6 (8.2 to 65.1)    | 52.6 (23.9 to 90.6)   |
|       | Yemen                | Incidence  | 6.3 (4.7 to 8.4)                    | 4.7 (3.1 to 7)         | 7.9 (5.8 to 10.4)    | 10 (7.5 to 13.1)       | 7.3 (4.7 to 11)        | 12.8 (9.6 to 16.5)     | 58.6 (49.8 to 70.8)     | 54.4 (38.9 to 82.4)   | 61.5 (51.4 to 71.7)   |
|       |                      | Prevalence | 154.6 (124.2 to 195.6)              | 139.5 (105.3 to 182.5) | 170 (134.6 to 214.8) | 222.5 (177.6 to 279.3) | 195.4 (146.7 to 263.5) | 249.6 (197.9 to 312.5) | 43.9 (35.1 to 55.3)     | 40 (26.8 to 61.8)     | 46.8 (37.4 to 56.7)   |
|       |                      | Deaths     | 1.6 (1 to 2.4)                      | 1.2 (0.8 to 2.1)       | 2.1 (1.3 to 3.2)     | 1.4 (0.9 to 2)         | 1.1 (0.7 to 1.7)       | 1.7 (1.1 to 2.6)       | -10.1 (-33.5 to 21.9)   | -11.2 (-38.3 to 23.6) | -15.6 (-37.7 to 17.3) |
|       |                      | DALYs      | 55.8 (39.5 to 78.3)                 | 50.1 (33.5 to 79.3)    | 63.3 (44.3 to 91.6)  | 54.1 (39.7 to 71.8)    | 49.4 (35.5 to 69.2)    | 59.1 (42.5 to 81.3)    | -3.1 (-27.6 to 27.4)    | -1.4 (-30.3 to 32)    | -6.5 (-30.7 to 27.3)  |
|       |                      | YLLs       | 45 (29.1 to 68.4)                   | 38.6 (23.1 to 66.9)    | 53.1 (34.3 to 80.1)  | 37.1 (24.5 to 53.8)    | 31.2 (19.4 to 48.4)    | 43.2 (28.2 to 62.7)    | -17.7 (-42.1 to 17.3)   | -19.3 (-46.7 to 20)   | -18.6 (-42.4 to 19.3) |
|       |                      | YLDs       | 10.8 (7.1 to 16)                    | 11.5 (7.4 to 17.6)     | 10.2 (6.7 to 15.1)   | 17.1 (10.9 to 25.8)    | 18.2 (11.3 to 27.6)    | 15.9 (10 to 24.3)      | 57.7 (37 to 81.4)       | 58.9 (30.5 to 99.2)   | 56.7 (29.5 to 84.5)   |

| Cause                                                      | Location                     | Measure    | Age-standardized rate (per 100,000) |                           |                           |                         |                           |                           | % Change (1990 to 2019) |                        |                        |
|------------------------------------------------------------|------------------------------|------------|-------------------------------------|---------------------------|---------------------------|-------------------------|---------------------------|---------------------------|-------------------------|------------------------|------------------------|
|                                                            |                              |            | 1990                                |                           |                           | 2019                    |                           |                           |                         |                        |                        |
|                                                            |                              |            | Both                                | Female                    | Male                      | Both                    | Female                    | Male                      | Both                    | Female                 | Male                   |
| Chronic kidney disease due to other and unspecified causes | North Africa and Middle East | Incidence  | 196 (180.7 to 214.5)                | 240.4 (220.9 to 264.2)    | 152.7 (140.7 to 165.9)    | 333.3 (308.8 to 359.2)  | 380.5 (352.6 to 409.2)    | 288.4 (265.9 to 312.6)    | 70.1 (66.1 to 74.3)     | 58.3 (53.8 to 63)      | 88.9 (84 to 94)        |
|                                                            |                              | Prevalence | 5636.5 (5253 to 5996.7)             | 6645 (6198.5 to 7080.1)   | 4635.7 (4324.9 to 4925.9) | 7772 (7296.1 to 8235.7) | 8935.4 (8376.5 to 9450.8) | 6670.7 (6241.7 to 7086.7) | 37.9 (35.2 to 40.7)     | 34.5 (31.7 to 37.3)    | 43.9 (40.4 to 47.7)    |
|                                                            |                              | Deaths     | 9 (6.9 to 11.9)                     | 10.1 (7.7 to 13.7)        | 7.8 (5.7 to 11)           | 7.6 (5.6 to 9.8)        | 8.9 (6.7 to 11.4)         | 6.3 (4.5 to 8.9)          | -15.7 (-30.9 to -1.3)   | -11.5 (-31.9 to 3.9)   | -20.2 (-35.7 to 1.5)   |
|                                                            |                              | DALYs      | 279.9 (236.7 to 333)                | 326.3 (273.8 to 388)      | 233.9 (193.7 to 286.5)    | 237.2 (191.1 to 288.4)  | 278.4 (223.6 to 336.4)    | 197.6 (156.3 to 252.1)    | -15.3 (-24.7 to -5)     | -14.7 (-26.7 to -2.7)  | -15.5 (-26.4 to -0.4)  |
|                                                            |                              | YLLs       | 228.6 (188.5 to 278.2)              | 257.6 (210.4 to 315.2)    | 199.8 (160 to 250.6)      | 165.8 (128.6 to 212.1)  | 189.6 (142.6 to 241.2)    | 142.7 (106.5 to 192.7)    | -27.4 (-38.1 to -15.2)  | -26.4 (-40.6 to -12.2) | -28.6 (-39.7 to -11.9) |
|                                                            |                              | YLDs       | 51.3 (37.9 to 66.8)                 | 68.7 (50.7 to 90.7)       | 34.1 (25.1 to 44.5)       | 71.4 (52.9 to 92.2)     | 88.7 (66.1 to 114.9)      | 54.9 (40.1 to 72.7)       | 39 (31.3 to 47.1)       | 29.1 (22.1 to 36.9)    | 61.3 (49.9 to 73.2)    |
|                                                            | Afghanistan                  | Incidence  | 181.6 (165.3 to 200.7)              | 225.5 (204.3 to 250.7)    | 140 (127.1 to 154)        | 288.3 (262.3 to 319.3)  | 329.2 (299 to 366.9)      | 244.5 (221.5 to 269)      | 58.8 (52.6 to 66.1)     | 46 (39.1 to 55.6)      | 74.7 (66.2 to 83.6)    |
|                                                            |                              | Prevalence | 5265.3 (4894.1 to 5650.6)           | 6286.9 (5821.2 to 6789.9) | 4228.4 (3926.7 to 4535.6) | 6911.6 (6413.7 to 7426) | 8026.9 (7423.3 to 8668.7) | 5777.8 (5349.7 to 6199.8) | 31.3 (27.6 to 35.4)     | 27.7 (23.6 to 32.7)    | 36.6 (31.6 to 42.3)    |
|                                                            |                              | Deaths     | 14.2 (9.7 to 21)                    | 16.3 (11.1 to 26.3)       | 12 (7.7 to 18.3)          | 12.1 (8.1 to 18.8)      | 14.2 (9.2 to 23.1)        | 9.9 (6.1 to 16.2)         | -14.7 (-36.6 to 8.2)    | -13.1 (-41.7 to 18.4)  | -17.6 (-37.4 to 5.8)   |
|                                                            |                              | DALYs      | 468.2 (359.3 to 615.8)              | 571 (427.9 to 805.4)      | 360.7 (265.8 to 480.8)    | 381.7 (287.4 to 515)    | 463.6 (342.3 to 665.2)    | 297.8 (206.6 to 421)      | -18.5 (-36.6 to 3.1)    | -18.8 (-41.4 to 5.9)   | -17.4 (-36.1 to 13)    |
|                                                            |                              | YLLs       | 415.9 (309.7 to 563.1)              | 496.5 (355.4 to 722.6)    | 331.4 (238.1 to 451)      | 306.4 (215.9 to 433.4)  | 362.3 (247.4 to 567.6)    | 248.7 (161.2 to 372.5)    | -26.3 (-45.6 to -2.7)   | -27 (-51.3 to 0.8)     | -25 (-44.1 to 7.3)     |
|                                                            |                              | YLDs       | 52.4 (37.9 to 68.6)                 | 74.5 (54 to 97.5)         | 29.3 (21 to 39.2)         | 75.3 (55.1 to 98)       | 101.3 (74.1 to 132)       | 49.1 (35.1 to 66.8)       | 43.8 (31.2 to 57.1)     | 36 (22 to 51.4)        | 67.7 (44.3 to 94.5)    |

| Cause | Location | Measure    | Age-standardized rate (per 100,000) |                              |                              |                              |                               |                              | % Change (1990 to 2019) |                       |                       |
|-------|----------|------------|-------------------------------------|------------------------------|------------------------------|------------------------------|-------------------------------|------------------------------|-------------------------|-----------------------|-----------------------|
|       |          |            | 1990                                |                              |                              | 2019                         |                               |                              |                         |                       |                       |
|       |          |            | Both                                | Female                       | Male                         | Both                         | Female                        | Male                         | Both                    | Female                | Male                  |
|       | Algeria  | Incidence  | 202.9<br>(184.9 to 224.3)           | 253.7 (229.7 to 281.6)       | 150.8<br>(136.4 to 166.3)    | 337.6 (310.7 to 367.7)       | 390.4 (358.9 to 423)          | 286 (259.1 to 316.2)         | 66.4 (59.8 to 72.9)     | 53.9 (46.6 to 61.9)   | 89.6 (78.8 to 100.5)  |
|       |          | Prevalence | 5673.1<br>(5278.5 to 6069.1)        | 6829.6<br>(6324.9 to 7344.3) | 4558.4<br>(4241.8 to 4882.4) | 7825.7<br>(7292.1 to 8357.6) | 9121.1<br>(8465 to 9772.1)    | 6582.6<br>(6115.1 to 7060.4) | 37.9 (33.7 to 42.1)     | 33.6 (28.6 to 38.3)   | 44.4 (38.5 to 50.7)   |
|       |          | Deaths     | 9.8 (6.8 to 14.3)                   | 12.6 (8.4 to 21.2)           | 7.7 (5.2 to 11)              | 7.9 (5.4 to 11)              | 11.3 (7.7 to 16.9)            | 5.4 (3.5 to 8)               | -19.7 (-37.3 to 3.9)    | -10.1 (-33.8 to 21.3) | -29.8 (-47.6 to -1.4) |
|       |          | DALYs      | 277.7<br>(209.2 to 381)             | 349.5 (255.7 to 547.8)       | 212.2<br>(157.8 to 276.8)    | 227.9 (177.1 to 292.3)       | 296.7 (228 to 399.6)          | 167.6 (126.9 to 223.1)       | -17.9 (-33.3 to 1.6)    | -15.1 (-35.8 to 7)    | -21 (-39.7 to 8.2)    |
|       |          | YLLs       | 226 (160.3 to 329.5)                | 277 (187.5 to 475.2)         | 180.4<br>(127.7 to 244.5)    | 154.3 (112.3 to 212.1)       | 202.2 (140.6 to 299.3)        | 113.9 (81 to 164.8)          | -31.7 (-46.7 to -11)    | -27 (-46.7 to -1.4)   | -36.9 (-54.4 to -6.8) |
|       |          | YLDs       | 51.7 (37.5 to 68.4)                 | 72.5 (52.3 to 96.3)          | 31.9 (22.5 to 42.8)          | 73.7 (54 to 96.7)            | 94.5 (68.5 to 123.7)          | 53.7 (38.2 to 72.9)          | 42.5 (28.1 to 57.9)     | 30.3 (15.3 to 47.4)   | 68.4 (44.5 to 98.5)   |
|       | Bahrain  | Incidence  | 227.5<br>(208.6 to 248.2)           | 285.3 (259.7 to 312.6)       | 181.3<br>(164.5 to 198.5)    | 369.2 (339.1 to 400.7)       | 420.2 (386.1 to 455.1)        | 339.1 (310.5 to 371.5)       | 62.3 (54.8 to 70.1)     | 47.3 (39.4 to 55.4)   | 87.1 (75.6 to 98.7)   |
|       |          | Prevalence | 6005.5<br>(5588 to 6397.5)          | 7292.6<br>(6747.1 to 7802.9) | 4966<br>(4615.9 to 5302.5)   | 8261.7<br>(7698.1 to 8830.7) | 9596.3<br>(8936.3 to 10267.5) | 7394.7<br>(6849.1 to 7942.9) | 37.6 (33.1 to 42.2)     | 31.6 (26.3 to 36.9)   | 48.9 (42.4 to 55.5)   |
|       |          | Deaths     | 9.1 (6.5 to 12)                     | 10.6 (7.3 to 14.3)           | 7.4 (4.8 to 10.9)            | 8 (5.5 to 10.8)              | 9.5 (6.5 to 12.7)             | 6.5 (4.2 to 9.3)             | -12.5 (-32.2 to 9.3)    | -10.5 (-34.6 to 17.3) | -12.5 (-33 to 11.7)   |
|       |          | DALYs      | 224.4<br>(176.1 to 284)             | 275.7 (212.8 to 351.8)       | 179.5<br>(134.5 to 237.3)    | 206.2 (160.8 to 253.6)       | 243.7 (187.9 to 297)          | 177.3 (135 to 226.7)         | -8.1 (-23.2 to 8.9)     | -11.6 (-29.4 to 6.5)  | -1.2 (-19.5 to 19.4)  |
|       |          | YLLs       | 170 (124.8 to 225.8)                | 199.4 (140.7 to 267.1)       | 143.2 (101 to 203)           | 131.1 (93 to 173.1)          | 151.5 (106.3 to 199.7)        | 114.7 (79.4 to 162)          | -22.9 (-39.9 to -3.5)   | -24 (-44.1 to 0.3)    | -19.9 (-38.2 to 3.1)  |
|       |          | YLDs       | 54.4 (39.3 to 71.6)                 | 76.3 (54.5 to 101.1)         | 36.4 (25.9 to 49.1)          | 75.1 (54.6 to 99.1)          | 92.2 (67.1 to 123.3)          | 62.6 (43.8 to 85.1)          | 38 (22.1 to 55.8)       | 20.7 (4 to 39.3)      | 72 (45.9 to 100.1)    |

| Cause                      | Location   | Measure                      | Age-standardized rate (per 100,000) |                           |                           |                           |                           |                        | % Change (1990 to 2019) |                        |      |
|----------------------------|------------|------------------------------|-------------------------------------|---------------------------|---------------------------|---------------------------|---------------------------|------------------------|-------------------------|------------------------|------|
|                            |            |                              | 1990                                |                           |                           | 2019                      |                           |                        |                         |                        |      |
|                            |            |                              | Both                                | Female                    | Male                      | Both                      | Female                    | Male                   | Both                    | Female                 | Male |
| Egypt                      | Incidence  | 207.4<br>(188.9 to 229.6)    | 270.1 (244.6 to 299.9)              | 145 (132.1 to 159.8)      | 352.2 (323 to 383.1)      | 416 (380.4 to 451.5)      | 295.7 (268.1 to 326)      | 69.9 (64.3 to 76.2)    | 54 (47.2 to 61.1)       | 104 (93.8 to 114.3)    |      |
|                            | Prevalence | 5690.2<br>(5285.6 to 6089.3) | 6942.1 (6425 to 7491)               | 4440.2 (4124.6 to 4746)   | 7990 (7430.9 to 8558.7)   | 9486.5 (8770 to 10188.2)  | 6755.5 (6244.6 to 7271.3) | 40.4 (36.7 to 44.5)    | 36.7 (32.4 to 41.2)     | 52.1 (46.2 to 59)      |      |
|                            | Deaths     | 10.2 (6.2 to 14.1)           | 13.2 (7 to 19)                      | 7.2 (4.9 to 10.5)         | 10.4 (5.8 to 15.8)        | 16.1 (7 to 24.4)          | 7.2 (4.2 to 12.3)         | 2 (-24.6 to 29.9)      | 21.4 (-18.2 to 57.3)    | -0.2 (-31.5 to 34.8)   |      |
|                            | DALYs      | 304.1<br>(211.2 to 387.9)    | 396.6 (249 to 524.5)                | 212.5 (156.5 to 288.2)    | 296.6 (193 to 405.6)      | 399.4 (227.8 to 569.2)    | 222 (150.4 to 329.8)      | -2.5 (-20.6 to 18.9)   | 0.7 (-20.1 to 24.8)     | 4.5 (-17.3 to 31.6)    |      |
|                            | YLLs       | 249.8<br>(159.5 to 332.5)    | 320 (174.5 to 443.4)                | 180.3 (123.3 to 254.9)    | 217.2 (121.8 to 325.1)    | 296.2 (130.9 to 461.1)    | 162.4 (91 to 271.5)       | -13.1 (-34.6 to 12.1)  | -7.5 (-36.3 to 21.7)    | -9.9 (-34.9 to 20.4)   |      |
|                            | YLDs       | 54.3 (39.8 to 72.1)          | 76.6 (55.9 to 102.5)                | 32.2 (23.2 to 43.6)       | 79.4 (58.7 to 105.1)      | 103.2 (74.2 to 137)       | 59.5 (42.8 to 81.4)       | 46.1 (31.6 to 61.9)    | 34.8 (20.3 to 51.9)     | 84.8 (59.1 to 115.1)   |      |
| Iran (Islamic Republic of) | Incidence  | 233 (212 to 255.2)           | 281 (255.7 to 310.3)                | 189.3 (172 to 207.7)      | 314.3 (288.9 to 341.2)    | 366.8 (338.1 to 396.5)    | 260.6 (239.9 to 283.5)    | 34.9 (31.1 to 39.2)    | 30.5 (25.7 to 35.5)     | 37.6 (33.9 to 41.8)    |      |
|                            | Prevalence | 6596.5<br>(6123.1 to 7033.7) | 7643.2 (7096.4 to 8161.8)           | 5568.4 (5187.2 to 5925.2) | 7948.3 (7456.9 to 8420.6) | 9160.3 (8583.5 to 9703.7) | 6749.7 (6330.4 to 7154.2) | 20.5 (18.6 to 22.6)    | 19.8 (17.5 to 22.4)     | 21.2 (19.2 to 23.4)    |      |
|                            | Deaths     | 6.3 (4.9 to 7.9)             | 6.7 (5.1 to 8.9)                    | 5.8 (4.3 to 7.5)          | 4.8 (3.6 to 6.1)          | 5.4 (4 to 6.6)            | 4.3 (3.2 to 5.6)          | -23.7 (-38.6 to -15.3) | -19.5 (-43.8 to -7.9)   | -26.6 (-35.9 to -13.4) |      |
|                            | DALYs      | 225.1<br>(188.6 to 264.1)    | 245.4 (205.2 to 290.3)              | 203.5 (161 to 244)        | 160 (134.3 to 188.8)      | 176.1 (145.8 to 208.6)    | 144.3 (119.6 to 174.4)    | -28.9 (-37 to -20.4)   | -28.2 (-37.1 to -19.5)  | -29.1 (-39 to -14.8)   |      |
|                            | YLLs       | 168.3<br>(136.2 to 203.6)    | 173 (137.6 to 211.5)                | 162.7 (122.7 to 201.9)    | 100.1 (80.5 to 122.5)     | 104.2 (82.6 to 125.7)     | 96 (77 to 121)            | -40.5 (-49.4 to -31.3) | -39.8 (-49.8 to -29.5)  | -41 (-51.6 to -25.8)   |      |
|                            | YLDs       | 56.8 (41.9 to 74.6)          | 72.4 (52.9 to 95.2)                 | 40.8 (30.1 to 53.6)       | 60 (43.8 to 78.3)         | 72 (52.6 to 95)           | 48.3 (34.9 to 64.1)       | 5.6 (-2.8 to 14.2)     | -0.7 (-10.3 to 9.1)     | 18.4 (6.7 to 29.7)     |      |

| Cause | Location | Measure    | Age-standardized rate (per 100,000) |                              |                            |                              |                               |                              | % Change (1990 to 2019) |                       |                       |
|-------|----------|------------|-------------------------------------|------------------------------|----------------------------|------------------------------|-------------------------------|------------------------------|-------------------------|-----------------------|-----------------------|
|       |          |            | 1990                                |                              |                            | 2019                         |                               |                              |                         |                       |                       |
|       |          |            | Both                                | Female                       | Male                       | Both                         | Female                        | Male                         | Both                    | Female                | Male                  |
|       | Iraq     | Incidence  | 226.9<br>(207.5 to 250)             | 276.3 (250.9 to 305.4)       | 176.4<br>(160.2 to 194.8)  | 361 (332.8 to 392.8)         | 406.2 (373.6 to 442.7)        | 316 (286.5 to 345.4)         | 59.1 (53 to 64.9)       | 47 (39.9 to 54.1)     | 79.2 (70.2 to 89.9)   |
|       |          | Prevalence | 6263.2<br>(5848.9 to 6694.1)        | 7425.7<br>(6915.9 to 7942.8) | 5067<br>(4714.6 to 5443.5) | 8473 (7906 to 9063.4)        | 9647.1<br>(8986.1 to 10350.7) | 7273.9<br>(6752.5 to 7822.1) | 35.3 (31.4 to 39)       | 29.9 (25.6 to 34.8)   | 43.6 (37.6 to 49.5)   |
|       |          | Deaths     | 11.3 (8 to 16.4)                    | 12.7 (8.6 to 19.7)           | 9.8 (6.6 to 14.5)          | 9.7 (6.6 to 13.6)            | 9.7 (6.7 to 13.6)             | 9.7 (6 to 15.2)              | -14.6 (-33.8 to 7.2)    | -23.5 (-45.9 to 3.6)  | -1.8 (-28.1 to 31.3)  |
|       |          | DALYs      | 351.6<br>(274.7 to 461.7)           | 411.8 (311.5 to 586.5)       | 290.3<br>(211.5 to 382.1)  | 292.1 (226.4 to 374.2)       | 314.6 (242.9 to 407.7)        | 269.8 (195.1 to 361.3)       | -16.9 (-32.4 to 0.5)    | -23.6 (-41.1 to -2.8) | -7.1 (-26.9 to 20.8)  |
|       |          | YLLs       | 286.9<br>(211.7 to 393.7)           | 324.6 (232.8 to 496.3)       | 248.7<br>(172.9 to 341)    | 203.9 (143.7 to 279.8)       | 206.3 (142.2 to 292.1)        | 201.9 (133 to 294)           | -28.9 (-45.6 to -8.9)   | -36.4 (-54 to -12.9)  | -18.8 (-40.1 to 12.6) |
|       |          | YLDs       | 64.6 (47.1 to 85.4)                 | 87.2 (62.9 to 114.6)         | 41.6 (29.7 to 54.6)        | 88.2 (64.8 to 114.3)         | 108.3 (78 to 141.5)           | 67.9 (48.7 to 92)            | 36.4 (23.7 to 49.7)     | 24.1 (10.6 to 39.5)   | 63.1 (39.6 to 88.1)   |
|       | Jordan   | Incidence  | 222.9 (205 to 242.2)                | 293.8 (269.6 to 318.7)       | 154.8<br>(139.8 to 171.7)  | 367.5 (342.5 to 396.4)       | 426.2 (394.5 to 459.1)        | 314.1 (288.2 to 346.3)       | 64.9 (56.9 to 72.8)     | 45.1 (36.4 to 53.6)   | 102.9 (88.1 to 118.8) |
|       |          | Prevalence | 6071.1<br>(5656.2 to 6463.5)        | 7454.3<br>(6926.4 to 7965)   | 4723<br>(4387.4 to 5070.4) | 8332.2<br>(7815.7 to 8872.2) | 9713.6<br>(9085.2 to 10344.4) | 7113.9<br>(6637.7 to 7638.8) | 37.2 (32.7 to 42)       | 30.3 (25 to 35.8)     | 50.6 (43.7 to 58.7)   |
|       |          | Deaths     | 8.8 (6.2 to 12)                     | 11.5 (7.9 to 16.2)           | 6 (4.2 to 8.6)             | 7.6 (5.3 to 10.3)            | 9.9 (6.7 to 13.6)             | 5.6 (3.7 to 8.1)             | -13.4 (-31.8 to 8.8)    | -13.7 (-40.1 to 15.4) | -6.8 (-31.8 to 26.3)  |
|       |          | DALYs      | 242.4<br>(192.2 to 305)             | 314.6 (244 to 410.8)         | 172 (134.1 to 223.7)       | 224.3 (178.5 to 279.1)       | 277.9 (216.1 to 355)          | 176.9 (135.5 to 223.4)       | -7.5 (-22.3 to 9.6)     | -11.7 (-30.5 to 8.9)  | 2.8 (-17.1 to 29.9)   |
|       |          | YLLs       | 183.5<br>(136.2 to 243.1)           | 230.2 (164.9 to 319.8)       | 137.7<br>(102.2 to 187.5)  | 145.1 (105.9 to 194)         | 174.7 (124.5 to 241.8)        | 118.5 (83.6 to 165.8)        | -20.9 (-38 to -0.1)     | -24.1 (-46.9 to 2.2)  | -14 (-35.5 to 16.3)   |
|       |          | YLDs       | 58.9 (42.8 to 78.1)                 | 84.5 (60.9 to 112.7)         | 34.3 (24.5 to 46.1)        | 79.2 (57.4 to 103.7)         | 103.2 (74.2 to 136.5)         | 58.4 (40.7 to 79.3)          | 34.5 (20.8 to 49.7)     | 22.2 (7.2 to 37.9)    | 70.3 (46.1 to 99.8)   |



| Cause | Location | Measure    | Age-standardized rate (per 100,000) |                              |                              |                         |                               |                              | % Change (1990 to 2019) |                        |                        |
|-------|----------|------------|-------------------------------------|------------------------------|------------------------------|-------------------------|-------------------------------|------------------------------|-------------------------|------------------------|------------------------|
|       |          |            | 1990                                |                              |                              | 2019                    |                               |                              | Both                    | Female                 | Male                   |
|       |          |            | Both                                | Female                       | Male                         | Both                    | Female                        | Male                         |                         |                        |                        |
|       | Kuwait   | Incidence  | 222.5<br>(203.8 to 244.4)           | 306.2 (277.3 to 339.9)       | 172.9<br>(155.4 to 193.1)    | 332.9 (303.9 to 365.1)  | 398.2 (364.9 to 433.1)        | 285.9 (258.6 to 317.9)       | 49.6 (38 to 61.8)       | 30 (19.4 to 41.3)      | 65.3 (49 to 82.7)      |
|       |          | Prevalence | 6141.5<br>(5751.4 to 6542.6)        | 7816.8<br>(7287.5 to 8368.5) | 5016.5<br>(4654.1 to 5390.2) | 7780.9 (7241 to 8341.7) | 9322.9<br>(8637.3 to 9995.9)  | 6654 (6160.3 to 7162.3)      | 26.7 (20.5 to 33.5)     | 19.3 (12.5 to 26.2)    | 32.6 (24.6 to 41.4)    |
|       |          | Deaths     | 6.8 (5 to 8.5)                      | 8.8 (6.3 to 11.4)            | 5.1 (3.6 to 6.8)             | 3.7 (2.6 to 5)          | 4.6 (3.2 to 6.5)              | 3.1 (2.1 to 4.3)             | -45 (-54.8 to -32.2)    | -47.5 (-59.9 to -28)   | -38.6 (-50.5 to -24.6) |
|       |          | DALYs      | 195.2<br>(159.1 to 233.5)           | 260.9 (208.2 to 316.9)       | 150.2<br>(120.6 to 184.7)    | 131.6 (105.1 to 161.3)  | 163 (127.6 to 203.9)          | 108.1 (83.2 to 135.6)        | -32.6 (-41.5 to -23)    | -37.5 (-47.7 to -23.8) | -28 (-39.5 to -14.5)   |
|       |          | YLLs       | 146.6<br>(114.7 to 183.8)           | 190.4 (141.9 to 245)         | 116.9 (90.2 to 149)          | 69.5 (50.9 to 91.9)     | 85.7 (61 to 117.3)            | 58.3 (40.5 to 80.1)          | -52.6 (-60.9 to -41.9)  | -55 (-65.3 to -38.3)   | -50.2 (-60.7 to -37)   |
|       |          | YLDs       | 48.6 (35.3 to 64.2)                 | 70.5 (50.2 to 91.9)          | 33.3 (23.7 to 45.2)          | 62.1 (44.3 to 81.3)     | 77.3 (54.9 to 101.7)          | 49.9 (34.9 to 67.6)          | 27.7 (13.1 to 44.4)     | 9.5 (-4.5 to 27.2)     | 49.9 (25.5 to 77.1)    |
|       | Lebanon  | Incidence  | 203.2 (185 to 223.9)                | 253.4 (231.3 to 280)         | 152.9<br>(137.4 to 168.8)    | 364.8 (335.6 to 397.5)  | 406.4 (373.3 to 439.2)        | 316.6 (289.7 to 349.1)       | 79.5 (71.1 to 89.3)     | 60.3 (51.9 to 70.4)    | 107.1 (94.3 to 121.9)  |
|       |          | Prevalence | 5831.2<br>(5441.3 to 6231.8)        | 6933.6<br>(6466.2 to 7431.3) | 4657.5<br>(4313.1 to 5007)   | 8345.8 (7817 to 8891)   | 9425.7<br>(8835.2 to 10038.5) | 7097.6<br>(6589.2 to 7641.7) | 43.1 (38.4 to 48.5)     | 35.9 (30.7 to 41.3)    | 52.4 (45.6 to 59.9)    |
|       |          | Deaths     | 8.1 (5.8 to 10.9)                   | 9.3 (6.5 to 13)              | 6.7 (4.7 to 9.5)             | 5.9 (4 to 8.1)          | 6.7 (4.4 to 8.9)              | 4.8 (2.7 to 8.2)             | -26.8 (-48.1 to -6.3)   | -27.4 (-49.2 to -6)    | -27.9 (-56.3 to 14.7)  |
|       |          | DALYs      | 226.1<br>(178.7 to 283)             | 268.9 (208.4 to 344.2)       | 180.7<br>(138.5 to 233.2)    | 185.2 (145 to 233.4)    | 211.7 (159 to 259.1)          | 154.4 (109.7 to 219.4)       | -18.1 (-34.4 to 0.5)    | -21.3 (-38.4 to -3.9)  | -14.5 (-35.5 to 17.8)  |
|       |          | YLLs       | 175.2<br>(131.4 to 228.9)           | 200.2 (143 to 272.3)         | 148.8<br>(109.7 to 202.7)    | 116.4 (80.4 to 156.1)   | 129.7 (86.7 to 171.8)         | 100.3 (61.1 to 164.3)        | -33.5 (-51.9 to -13)    | -35.2 (-54.6 to -15.3) | -32.6 (-55.6 to 5.5)   |
|       |          | YLDs       | 50.9 (36.9 to 66.8)                 | 68.7 (49.2 to 90.4)          | 31.9 (22.5 to 43.3)          | 68.8 (49.4 to 89.4)     | 82 (58.8 to 107.4)            | 54.2 (37.8 to 73.4)          | 35.2 (20.7 to 51.5)     | 19.4 (4.1 to 37.1)     | 69.8 (43.6 to 97)      |

| Cause   | Location   | Measure                      | Age-standardized rate (per 100,000) |                              |                              |                            |                              |                       | % Change (1990 to 2019) |                        |      |
|---------|------------|------------------------------|-------------------------------------|------------------------------|------------------------------|----------------------------|------------------------------|-----------------------|-------------------------|------------------------|------|
|         |            |                              | 1990                                |                              |                              | 2019                       |                              |                       |                         |                        |      |
|         |            |                              | Both                                | Female                       | Male                         | Both                       | Female                       | Male                  | Both                    | Female                 | Male |
| Libya   | Incidence  | 204.3<br>(185.9 to 225.7)    | 257.7 (232.9 to 285.5)              | 157.7<br>(141.9 to 175.4)    | 336.5 (307.6 to 369.3)       | 390.3 (356.9 to 424.6)     | 285.2 (258.4 to 315.2)       | 64.7 (58.4 to 71.1)   | 51.5 (44.5 to 59.6)     | 80.8 (70.7 to 91.5)    |      |
|         | Prevalence | 5814.7<br>(5418.1 to 6220.5) | 7039.3<br>(6545.9 to 7564.9)        | 4754.2<br>(4422.8 to 5101.1) | 7935.8<br>(7368.8 to 8470.3) | 9264.6<br>(8617.8 to 9903) | 6673.7<br>(6172.5 to 7165)   | 36.5 (32.8 to 40.3)   | 31.6 (27.4 to 36.3)     | 40.4 (35.2 to 46.2)    |      |
|         | Deaths     | 7.5 (5 to 10.5)              | 9.1 (6 to 13.2)                     | 6 (3.9 to 8.8)               | 7.5 (4.6 to 11.1)            | 9.5 (5.5 to 14.4)          | 5.6 (3.3 to 9.4)             | 1.2 (-26 to 35)       | 4.3 (-28.2 to 39.2)     | -5.8 (-34.4 to 36)     |      |
|         | DALYs      | 228.7 (178 to 288.4)         | 289.1 (220.1 to 370.1)              | 175.5<br>(134.1 to 231.8)    | 236.2 (170.2 to 314.3)       | 295.9 (205.2 to 391.4)     | 178.6 (128.8 to 260.1)       | 3.3 (-17.4 to 29)     | 2.4 (-20.6 to 27.3)     | 1.8 (-22.5 to 36.1)    |      |
|         | YLLs       | 176.7<br>(127.8 to 232.6)    | 215.5 (147.7 to 294.4)              | 142.6<br>(103.5 to 198.2)    | 163.3 (102.3 to 235.5)       | 203.2 (119.7 to 297.2)     | 124.5 (79 to 203)            | -7.6 (-33.2 to 25.5)  | -5.7 (-34.8 to 27.8)    | -12.6 (-39.1 to 28.1)  |      |
|         | YLDs       | 52 (37.9 to 69)              | 73.6 (52.6 to 99.6)                 | 33 (23.4 to 43.4)            | 72.9 (53.6 to 94.6)          | 92.7 (66.8 to 122.1)       | 54.1 (39 to 72.1)            | 40.3 (26.7 to 55.7)   | 25.9 (10.5 to 42.8)     | 64.1 (41.8 to 89.6)    |      |
| Morocco | Incidence  | 159.4<br>(144.4 to 176.2)    | 197 (177.1 to 219.5)                | 121.2<br>(109.4 to 134.4)    | 325.1 (297.9 to 356.1)       | 366.4 (334.8 to 402.9)     | 283.9 (257.6 to 311.9)       | 103.9 (96.3 to 112.7) | 86 (76.4 to 96.1)       | 134.1 (122.4 to 148.8) |      |
|         | Prevalence | 5069<br>(4698.8 to 5415.7)   | 5985.4<br>(5520.3 to 6434.6)        | 4104.5<br>(3803.9 to 4412.3) | 7694.4<br>(7193.1 to 8231.1) | 8804<br>(8213.2 to 9422.6) | 6562.3<br>(6095.1 to 7032.5) | 51.8 (47 to 56.9)     | 47.1 (41.7 to 52.9)     | 59.9 (53.3 to 67.4)    |      |
|         | Deaths     | 8.8 (6.7 to 12.4)            | 9.5 (7 to 14.3)                     | 8.2 (5.6 to 12.8)            | 10.3 (7.3 to 14.1)           | 11.9 (8.3 to 16.5)         | 8.7 (5.6 to 13.4)            | 16.6 (-11.7 to 44.7)  | 24.8 (-14 to 64.2)      | 6.3 (-21.4 to 39.5)    |      |
|         | DALYs      | 261.3<br>(215.5 to 321.4)    | 301.3 (244.4 to 377.6)              | 220.5<br>(169.7 to 281.8)    | 293.5 (228.3 to 374.5)       | 350 (263.1 to 448)         | 236.2 (174.3 to 318.9)       | 12.3 (-9.9 to 35.6)   | 16.2 (-12.5 to 45.2)    | 7.1 (-15 to 34.8)      |      |
|         | YLLs       | 216.3<br>(171.8 to 271)      | 239.6 (185.1 to 313.2)              | 192.9 (144 to 257.3)         | 214.9 (153.9 to 287.6)       | 251.8 (174.8 to 340.9)     | 177.5 (119.1 to 257.1)       | -0.7 (-24.7 to 25.5)  | 5.1 (-28.1 to 42)       | -8 (-31.3 to 22.1)     |      |
|         | YLDs       | 45.1 (32.7 to 59.2)          | 61.7 (44.5 to 81)                   | 27.6 (19.4 to 37.3)          | 78.6 (57.4 to 103)           | 98.2 (71 to 129.4)         | 58.7 (41.2 to 79.4)          | 74.6 (56.9 to 94)     | 59.3 (40.7 to 80.1)     | 112.4 (81.3 to 147.4)  |      |

| Cause | Location  | Measure    | Age-standardized rate (per 100,000) |                              |                              |                              |                              |                              | % Change (1990 to 2019) |                        |                        |
|-------|-----------|------------|-------------------------------------|------------------------------|------------------------------|------------------------------|------------------------------|------------------------------|-------------------------|------------------------|------------------------|
|       |           |            | 1990                                |                              |                              | 2019                         |                              |                              |                         |                        |                        |
|       |           |            | Both                                | Female                       | Male                         | Both                         | Female                       | Male                         | Both                    | Female                 | Male                   |
|       | Oman      | Incidence  | 168.7<br>(153.2 to 186.7)           | 209.8 (189.1 to 234.1)       | 134.1<br>(120.7 to 149)      | 327.1 (298.4 to 355.3)       | 376.1 (342.5 to 409.7)       | 291.9 (265 to 319.6)         | 93.9 (85 to 103.6)      | 79.2 (68.6 to 91.3)    | 117.6 (102.8 to 132.4) |
|       |           | Prevalence | 5191.8<br>(4816.7 to 5544.4)        | 6230.8<br>(5757.8 to 6694.7) | 4360.8<br>(4031.7 to 4687.4) | 7635.5<br>(7143.4 to 8164.7) | 8976.7<br>(8370.8 to 9601.6) | 6745 (6281.7 to 7233.8)      | 47.1 (42.2 to 52)       | 44.1 (38.2 to 50.3)    | 54.7 (48 to 62.1)      |
|       |           | Deaths     | 4 (2.7 to 5.9)                      | 4.5 (3.1 to 6.6)             | 3.7 (2.2 to 5.7)             | 4.6 (3.2 to 6.1)             | 5.3 (3.7 to 7)               | 4 (2.7 to 5.7)               | 13.2 (-18.1 to 49.8)    | 16.9 (-17.9 to 59.4)   | 9.2 (-29.8 to 61.9)    |
|       |           | DALYs      | 131.1<br>(101.4 to 168.1)           | 167.2 (129.5 to 212)         | 100.2 (73.2 to 138.6)        | 160 (127.9 to 194.6)         | 206.1 (165.5 to 254.1)       | 125 (96.9 to 157)            | 22 (1.5 to 43.9)        | 23.3 (2 to 45.7)       | 24.7 (-5.3 to 58.5)    |
|       |           | YLLs       | 78.9 (53.9 to 112.9)                | 94.1 (65 to 132.9)           | 67 (42.4 to 102.6)           | 75.5 (56.4 to 99.3)          | 93.2 (67.9 to 123.3)         | 62.3 (42.5 to 86.1)          | -4.2 (-28.6 to 26.6)    | -1 (-29.9 to 36.4)     | -7 (-37.7 to 35.4)     |
|       |           | YLDs       | 52.2 (37.6 to 68.1)                 | 73 (52.9 to 95.9)            | 33.2 (23.8 to 44.8)          | 84.4 (62.4 to 110.9)         | 112.9 (81.8 to 149.5)        | 62.7 (45.2 to 84.8)          | 61.7 (47.2 to 78)       | 54.6 (39.4 to 72.4)    | 88.6 (62.4 to 118.1)   |
|       | Palestine | Incidence  | 231 (211.4 to 253.3)                | 270.6 (245.3 to 300)         | 184 (166.2 to 201.4)         | 353.5 (324.8 to 384.9)       | 390.6 (358.6 to 426.5)       | 316.8 (288 to 346.9)         | 53 (47 to 59.8)         | 44.3 (36.2 to 53.3)    | 72.2 (60 to 83.4)      |
|       |           | Prevalence | 6210<br>(5767.7 to 6637.3)          | 7178.6<br>(6660.4 to 7677.3) | 5074.9<br>(4713.6 to 5440.6) | 8135.3<br>(7610.3 to 8702.2) | 9116.2<br>(8527.8 to 9787.2) | 7087.3<br>(6563.7 to 7602.4) | 31 (27.3 to 35)         | 27 (21.9 to 32.2)      | 39.7 (33 to 45.9)      |
|       |           | Deaths     | 11.7 (8.4 to 15.7)                  | 12.7 (9.2 to 17)             | 10.6 (7.3 to 14.9)           | 8.1 (5.9 to 10.6)            | 8.6 (6.3 to 11.2)            | 7.6 (5.3 to 10.4)            | -31 (-46.6 to -11.9)    | -32.6 (-47.6 to -11.8) | -28.3 (-46 to -6.9)    |
|       |           | DALYs      | 343.8<br>(266.6 to 433.6)           | 393.7 (303.9 to 499.1)       | 289.2<br>(213.3 to 386.6)    | 248.1 (200.7 to 301.9)       | 273.5 (222.5 to 331.1)       | 220.9 (174.4 to 276.5)       | -27.8 (-40.4 to -12.1)  | -30.5 (-43.4 to -13.9) | -23.6 (-38.1 to -4.4)  |
|       |           | YLLs       | 282.2<br>(206.3 to 369.4)           | 313.2 (227.3 to 414.7)       | 248.9<br>(174.8 to 346)      | 169.2 (131.2 to 218.2)       | 178.6 (135.5 to 230.8)       | 159.3 (116.3 to 210.3)       | -40 (-52.7 to -22.8)    | -43 (-56.3 to -26.1)   | -36 (-49.9 to -17)     |
|       |           | YLDs       | 61.6 (45.3 to 80.4)                 | 80.5 (58.6 to 106)           | 40.3 (28.6 to 53.1)          | 78.8 (58.9 to 103.6)         | 94.9 (70.5 to 125.2)         | 61.5 (43.9 to 82.3)          | 28 (15.5 to 41.2)       | 17.9 (3.9 to 33.5)     | 52.8 (32 to 77.3)      |

| Cause        | Location   | Measure                      | Age-standardized rate (per 100,000) |                              |                              |                                 |                              |                       | % Change (1990 to 2019) |                       |      |
|--------------|------------|------------------------------|-------------------------------------|------------------------------|------------------------------|---------------------------------|------------------------------|-----------------------|-------------------------|-----------------------|------|
|              |            |                              | 1990                                |                              |                              | 2019                            |                              |                       |                         |                       |      |
|              |            |                              | Both                                | Female                       | Male                         | Both                            | Female                       | Male                  | Both                    | Female                | Male |
| Qatar        | Incidence  | 234.5<br>(211.7 to 258.2)    | 328 (295.4 to 361.9)                | 189.7<br>(170.1 to 210.3)    | 366.5 (335.5 to 399.3)       | 444.6 (407.6 to 481.1)          | 340.5 (309.2 to 372.5)       | 56.3 (49.5 to 63.3)   | 35.5 (28 to 43.4)       | 79.5 (69.8 to 89.7)   |      |
|              | Prevalence | 6184.8<br>(5742.2 to 6641.3) | 7951.1<br>(7345.1 to 8588.9)        | 5111.3<br>(4730.3 to 5490)   | 8053.7 (7465 to 8646.4)      | 10037.7<br>(9301.3 to 10818.4)  | 7406.1<br>(6848.6 to 7964.9) | 30.2 (25.5 to 34.6)   | 26.2 (21 to 31.2)       | 44.9 (38.4 to 51)     |      |
|              | Deaths     | 11.6 (7.6 to 21.3)           | 15 (9.4 to 29.9)                    | 8.3 (5 to 13.9)              | 9.7 (6.5 to 13.5)            | 19.4 (13.3 to 26.4)             | 6.9 (4.3 to 10.1)            | -16.4 (-50.8 to 15.7) | 29.7 (-31.5 to 86.9)    | -17.1 (-43.6 to 17.3) |      |
|              | DALYs      | 257.9<br>(193.6 to 387.3)    | 356.5 (259.5 to 588.2)              | 189.3<br>(135.8 to 268.5)    | 212.6 (161.2 to 272.1)       | 366.8 (279.1 to 469.3)          | 163.5 (120.5 to 212.3)       | -17.6 (-41.5 to 3.2)  | 2.9 (-33.7 to 34.6)     | -13.6 (-33.5 to 10.5) |      |
|              | YLLs       | 200.5 (140 to 334.9)         | 271.1 (177.8 to 500.4)              | 149.8<br>(100.6 to 227.5)    | 140.7 (96.1 to 192.7)        | 268.1 (182.4 to 362.2)          | 100.4 (65.4 to 146.3)        | -29.8 (-54.4 to -4.6) | -1.1 (-42.3 to 40.4)    | -33 (-51.6 to -7.4)   |      |
|              | YLDs       | 57.4 (42.7 to 76.6)          | 85.4 (62.2 to 112.8)                | 39.5 (28.6 to 53.6)          | 71.9 (52.1 to 96.2)          | 98.8 (72.2 to 128.1)            | 63 (44 to 85.9)              | 25.2 (8.7 to 42.9)    | 15.7 (1.6 to 31.9)      | 59.7 (35.8 to 84.7)   |      |
| Saudi Arabia | Incidence  | 228.6<br>(209.7 to 249.7)    | 295.7 (267.2 to 325.4)              | 182 (164.4 to 200.5)         | 414.4 (386.3 to 442.4)       | 477.4 (444.3 to 512.9)          | 372.8 (344.5 to 401)         | 81.3 (72.6 to 90.7)   | 61.4 (50.9 to 73.2)     | 104.9 (91.8 to 117.9) |      |
|              | Prevalence | 6035.8<br>(5607.2 to 6425.4) | 7497.2<br>(6957.2 to 8025.3)        | 4975.6<br>(4610.6 to 5317.6) | 9103.1<br>(8536.7 to 9675.9) | 10787.3<br>(10048.3 to 11532.4) | 7975.1<br>(7438.6 to 8519.4) | 50.8 (45.4 to 57.1)   | 43.9 (36.5 to 52.5)     | 60.3 (53.2 to 68)     |      |
|              | Deaths     | 11.4 (7.9 to 15.5)           | 12.4 (8.7 to 17)                    | 10.7 (6.8 to 15.5)           | 12.4 (8.5 to 16.7)           | 15.1 (10.2 to 20.8)             | 10.4 (7 to 14.7)             | 9 (-21.5 to 45.7)     | 21.6 (-18 to 67.3)      | -2.3 (-34.9 to 43.5)  |      |
|              | DALYs      | 313.2<br>(236.4 to 410.3)    | 370.6 (283.4 to 486.6)              | 273.3<br>(194.2 to 375.2)    | 331.8 (249.9 to 423)         | 416.2 (310.8 to 542.3)          | 273.7 (201.4 to 363.9)       | 5.9 (-19.1 to 35.5)   | 12.3 (-17.2 to 45.3)    | 0.1 (-26.1 to 38.3)   |      |
|              | YLLs       | 257.9<br>(182.1 to 353.8)    | 292.1 (206.5 to 399.3)              | 235.2<br>(156.5 to 334.6)    | 248.4 (173.9 to 342.5)       | 309.9 (210.3 to 432.3)          | 206.1 (141.2 to 291.9)       | -3.7 (-31.5 to 30.9)  | 6.1 (-28.1 to 48.6)     | -12.4 (-39.8 to 27.5) |      |
|              | YLDs       | 55.3 (40.6 to 72.3)          | 78.5 (57.1 to 103)                  | 38.1 (27.7 to 50.8)          | 83.4 (60.7 to 109.2)         | 106.3 (78 to 140.6)             | 67.6 (47.3 to 90.6)          | 50.7 (34.2 to 69.8)   | 35.4 (17.6 to 54.9)     | 77.2 (50.9 to 105.7)  |      |

| Cause                | Location   | Measure                      | Age-standardized rate (per 100,000) |                              |                              |                              |                              |                        | % Change (1990 to 2019) |                        |      |
|----------------------|------------|------------------------------|-------------------------------------|------------------------------|------------------------------|------------------------------|------------------------------|------------------------|-------------------------|------------------------|------|
|                      |            |                              | 1990                                |                              |                              | 2019                         |                              |                        |                         |                        |      |
|                      |            |                              | Both                                | Female                       | Male                         | Both                         | Female                       | Male                   | Both                    | Female                 | Male |
| Sudan                | Incidence  | 156.5<br>(142.1 to 172.7)    | 194.9 (176.3 to 217.3)              | 121.7<br>(110.3 to 134.3)    | 278.4 (251.9 to 308.3)       | 320.5 (290.5 to 353.1)       | 242.7 (218.1 to 270)         | 77.9 (71.3 to 84.7)    | 64.5 (56.1 to 72.4)     | 99.4 (88.7 to 110.7)   |      |
|                      | Prevalence | 4988.7<br>(4631 to 5360.5)   | 5890<br>(5451.3 to 6361.8)          | 4111.6<br>(3807.2 to 4427.8) | 6894.9<br>(6405.7 to 7399.6) | 7946.7<br>(7382.1 to 8522.3) | 5930.5<br>(5478.1 to 6373.4) | 38.2 (34.1 to 42.6)    | 34.9 (30.3 to 40.2)     | 44.2 (38.4 to 50.3)    |      |
|                      | Deaths     | 7.4 (5.2 to 10.7)            | 8.2 (5.5 to 12.6)                   | 6.5 (4.4 to 10)              | 6.8 (4.3 to 10.7)            | 7.8 (4.9 to 11.7)            | 6 (3.4 to 10.9)              | -7.1 (-38.2 to 33.4)   | -5 (-44.5 to 31.1)      | -8.3 (-39.4 to 53.9)   |      |
|                      | DALYs      | 254 (195.6 to 340)           | 304.7 (223.5 to 439.5)              | 205.9<br>(150.9 to 271.5)    | 231.4 (168.1 to 320.1)       | 270.8 (195.9 to 359)         | 196.1 (135.1 to 307.8)       | -8.9 (-34.1 to 24.2)   | -11.1 (-42.7 to 18.6)   | -4.7 (-33.1 to 52.1)   |      |
|                      | YLLs       | 210.6<br>(152.5 to 294)      | 244.9 (164.2 to 373.4)              | 178.4<br>(124.4 to 241.7)    | 164.3 (104.8 to 246.5)       | 184.3 (114.3 to 268.6)       | 146.9 (90.5 to 251.2)        | -22 (-49.7 to 17.4)    | -24.7 (-58.1 to 10.8)   | -17.7 (-47.9 to 47.4)  |      |
|                      | YLDs       | 43.4 (31.5 to 58.5)          | 59.8 (43 to 81.3)                   | 27.4 (19.8 to 36.4)          | 67.1 (48.7 to 87.9)          | 86.5 (62.7 to 114.5)         | 49.2 (35.5 to 66.7)          | 54.6 (40.9 to 70.3)    | 44.7 (28.6 to 61.7)     | 79.4 (54.5 to 107.6)   |      |
| Syrian Arab Republic | Incidence  | 208.3<br>(190.4 to 229.3)    | 267.7 (242.6 to 295.9)              | 154.6<br>(139.8 to 170.5)    | 329.9 (305.1 to 358.4)       | 383.8 (353.2 to 416.9)       | 276.2 (252.4 to 305.8)       | 58.3 (49.4 to 66.7)    | 43.4 (34.5 to 52.4)     | 78.7 (63.3 to 94.3)    |      |
|                      | Prevalence | 5838.3<br>(5430.1 to 6239.8) | 7081.2<br>(6557.2 to 7589.1)        | 4693.3<br>(4352.5 to 5054.7) | 7687.5<br>(7200.4 to 8172.7) | 8918.7<br>(8297.2 to 9539)   | 6477.5<br>(6020.6 to 6947.3) | 31.7 (27 to 36.3)      | 25.9 (20.4 to 31.1)     | 38 (31 to 45.8)        |      |
|                      | Deaths     | 10.1 (7.5 to 13.6)           | 11.8 (8.7 to 15.8)                  | 8.5 (6.1 to 11.7)            | 7.1 (5.1 to 9.7)             | 9.7 (6.9 to 12.9)            | 5.6 (3.8 to 7.8)             | -29.1 (-48.3 to -5.4)  | -17.6 (-41.2 to 9.8)    | -34.4 (-55 to -7.4)    |      |
|                      | DALYs      | 340.4<br>(275.8 to 417.6)    | 392.6 (316.2 to 480.2)              | 292.2<br>(227.1 to 366.6)    | 229.8 (179.6 to 289.8)       | 279.3 (219.6 to 354.7)       | 187.8 (143.1 to 243.2)       | -32.5 (-46.6 to -15.2) | -28.9 (-43.9 to -9.9)   | -35.7 (-50.6 to -16.2) |      |
|                      | YLLs       | 281.1<br>(218.1 to 353.1)    | 309.3 (237.1 to 392.4)              | 255.1<br>(191.7 to 330.8)    | 160.1 (118 to 213)           | 191.2 (138.9 to 259.5)       | 136.6 (97.1 to 191.9)        | -43 (-57.9 to -22.2)   | -38.2 (-55.7 to -14.1)  | -46.5 (-61.3 to -24.9) |      |
|                      | YLDs       | 59.3 (43.2 to 78.6)          | 83.3 (60.4 to 110.3)                | 37 (26.5 to 50.3)            | 69.7 (50.6 to 91.8)          | 88 (63.9 to 116.3)           | 51.2 (35.9 to 69)            | 17.5 (5.9 to 31.6)     | 5.6 (-7 to 19.1)        | 38.3 (17.5 to 63.9)    |      |

| Cause | Location | Measure    | Age-standardized rate (per 100,000) |                           |                           |                           |                           |                         | % Change (1990 to 2019) |                        |                        |
|-------|----------|------------|-------------------------------------|---------------------------|---------------------------|---------------------------|---------------------------|-------------------------|-------------------------|------------------------|------------------------|
|       |          |            | 1990                                |                           |                           | 2019                      |                           |                         |                         |                        |                        |
|       |          |            | Both                                | Female                    | Male                      | Both                      | Female                    | Male                    | Both                    | Female                 | Male                   |
|       | Tunisia  | Incidence  | 192.6 (175 to 211.6)                | 239.3 (216.4 to 262.5)    | 149.3 (134.6 to 165.8)    | 337.3 (309.8 to 365.2)    | 381.1 (348.3 to 413.6)    | 292.9 (266.8 to 318.5)  | 75.1 (67.3 to 83.1)     | 59.3 (50.4 to 69.1)    | 96.2 (84.4 to 108.9)   |
|       |          | Prevalence | 5514.2 (5141.4 to 5895)             | 6553.4 (6105 to 7000.8)   | 4494.6 (4156.8 to 4840.5) | 7764.5 (7251.9 to 8256)   | 8838.4 (8217.2 to 9430.7) | 6629.3 (6162 to 7097.1) | 40.8 (36.6 to 45.2)     | 34.9 (29.8 to 40.5)    | 47.5 (41.5 to 54.4)    |
|       |          | Deaths     | 7.2 (5.5 to 9.5)                    | 7.9 (6 to 10.8)           | 6.5 (4.6 to 9)            | 6.8 (4.5 to 9.4)          | 7.4 (4.8 to 10.6)         | 6 (3.8 to 9.1)          | -5.6 (-32.9 to 25.6)    | -6 (-35.8 to 28.5)     | -7 (-36.7 to 31.5)     |
|       |          | DALYs      | 212.4 (175.6 to 255.5)              | 246 (202.7 to 300.2)      | 179.9 (142.8 to 226.4)    | 195.3 (148.1 to 252.6)    | 214 (160.9 to 279.8)      | 174.8 (129.5 to 236.7)  | -8.1 (-27.6 to 13.5)    | -13 (-32.9 to 9.4)     | -2.8 (-25 to 26.8)     |
|       |          | YLLs       | 168.3 (136.2 to 209.2)              | 189.8 (150 to 238.4)      | 147.6 (111.5 to 194.8)    | 132.3 (90.4 to 183.3)     | 142.1 (92.4 to 201.3)     | 121.4 (80.1 to 177.8)   | -21.4 (-44.3 to 5.4)    | -25.2 (-49.5 to 3.6)   | -17.8 (-42.2 to 17.5)  |
|       |          | YLDs       | 44.1 (32.4 to 58.1)                 | 56.1 (41.4 to 75.1)       | 32.2 (22.8 to 43.1)       | 62.9 (46.3 to 82.4)       | 72 (52.4 to 95.1)         | 53.5 (38.4 to 71.4)     | 42.7 (27.9 to 58.7)     | 28.2 (12.2 to 47.6)    | 66 (44.6 to 89.7)      |
|       | Turkey   | Incidence  | 170.9 (158.3 to 185.3)              | 194.8 (180.2 to 213.4)    | 144.7 (133.1 to 156.4)    | 321.9 (296.1 to 350.6)    | 351.7 (323 to 381.3)      | 289.5 (263.4 to 320.6)  | 88.4 (75.5 to 101.9)    | 80.5 (66.9 to 95.9)    | 100.1 (84.2 to 119.3)  |
|       |          | Prevalence | 5208.3 (4859.9 to 5582.7)           | 5919.1 (5520.4 to 6383.4) | 4452.7 (4155.8 to 4762.4) | 7421.8 (6934.1 to 7928.8) | 8254.1 (7696.6 to 8801.5) | 6533.9 (6058 to 7036.9) | 42.5 (36.4 to 49.7)     | 39.4 (32.7 to 47.4)    | 46.7 (39 to 56.1)      |
|       |          | Deaths     | 9.1 (6.6 to 13.4)                   | 9.3 (6.7 to 14)           | 8.9 (6 to 14.1)           | 6 (4.3 to 7.9)            | 6.6 (4.7 to 8.8)          | 5.1 (3.5 to 7.1)        | -34.5 (-56 to -13)      | -28.6 (-54.2 to -4.2)  | -42.7 (-62.6 to -16.9) |
|       |          | DALYs      | 292.7 (238.5 to 368.1)              | 307.5 (246.9 to 398.3)    | 276.6 (213.6 to 357.7)    | 181.1 (147.9 to 221.8)    | 198.8 (159.3 to 244.9)    | 160.4 (125.6 to 201.2)  | -38.1 (-50.2 to -24.8)  | -35.4 (-50.7 to -20.2) | -42 (-54.5 to -25.1)   |
|       |          | YLLs       | 247 (194.8 to 320.8)                | 250.5 (189.2 to 341.9)    | 243 (182.6 to 322.2)      | 117.5 (89.3 to 153.8)     | 124.4 (93.6 to 162.1)     | 108.2 (80.1 to 145.3)   | -52.4 (-63.7 to -38.9)  | -50.3 (-65.2 to -33.4) | -55.5 (-67.1 to -39)   |
|       |          | YLDs       | 45.7 (34 to 60.5)                   | 57 (42.2 to 75.8)         | 33.6 (24.5 to 44.1)       | 63.6 (46.9 to 83.7)       | 74.4 (54.9 to 98.4)       | 52.1 (37.2 to 69.9)     | 39.1 (24.9 to 56.5)     | 30.4 (14.9 to 51.1)    | 55.2 (32.1 to 81.2)    |

| Cause | Location             | Measure    | Age-standardized rate (per 100,000) |                              |                              |                              |                                |                              | % Change (1990 to 2019) |                       |                       |
|-------|----------------------|------------|-------------------------------------|------------------------------|------------------------------|------------------------------|--------------------------------|------------------------------|-------------------------|-----------------------|-----------------------|
|       |                      |            | 1990                                |                              |                              | 2019                         |                                |                              |                         |                       |                       |
|       |                      |            | Both                                | Female                       | Male                         | Both                         | Female                         | Male                         | Both                    | Female                | Male                  |
|       | United Arab Emirates | Incidence  | 253.9<br>(231.5 to 276)             | 328.4 (299.1 to 361.9)       | 209.6 (190 to 229.8)         | 375.9 (346.7 to 406.9)       | 459.2 (426.6 to 493.6)         | 345.4 (315.6 to 377.9)       | 48 (42.2 to 54)         | 39.8 (33.3 to 46.3)   | 64.8 (56.2 to 73)     |
|       |                      | Prevalence | 6375.7<br>(5923 to 6810.7)          | 8004.4<br>(7410.1 to 8642.1) | 5446.9<br>(5055.3 to 5831.9) | 8277.6<br>(7710.8 to 8877)   | 10178.7<br>(9493.1 to 10891.5) | 7522 (6978.1 to 8095.2)      | 29.8 (26.2 to 33.7)     | 27.2 (22.8 to 31.5)   | 38.1 (32.5 to 43.9)   |
|       |                      | Deaths     | 14.3 (8.6 to 19.7)                  | 17.5 (10.5 to 25.4)          | 12 (7 to 17.5)               | 10.7 (6.1 to 16.8)           | 14.4 (7.3 to 21)               | 9.2 (5 to 16.7)              | -25.1 (-49.7 to 5.2)    | -17.9 (-51 to 17.7)   | -23.3 (-48.3 to 19.3) |
|       |                      | DALYs      | 372.7<br>(279.7 to 480.6)           | 452.1 (325 to 621.2)         | 324.9<br>(232.2 to 440.8)    | 312.4 (212.9 to 450.6)       | 393.8 (262.7 to 521.9)         | 279.8 (184.2 to 453.4)       | -16.2 (-39.2 to 12.9)   | -12.9 (-43.1 to 17.7) | -13.9 (-37.6 to 25.6) |
|       |                      | YLLs       | 311.8<br>(217.1 to 415.6)           | 363 (236.7 to 529.6)         | 280.5<br>(188.9 to 395)      | 234 (144.5 to 368.5)         | 289.8 (163 to 422.6)           | 212.5 (124.2 to 384.4)       | -24.9 (-50.1 to 9.6)    | -20.2 (-54.8 to 16.8) | -24.2 (-50 to 22.1)   |
|       |                      | YLDs       | 60.9 (44.2 to 81)                   | 89.1 (64.6 to 116.4)         | 44.5 (31.7 to 60.4)          | 78.3 (57.2 to 104.6)         | 104 (76.1 to 136.9)            | 67.3 (47.9 to 91.8)          | 28.6 (15.1 to 42.1)     | 16.7 (3.9 to 31.4)    | 51.4 (30.5 to 74.8)   |
|       | Yemen                | Incidence  | 155.6<br>(141.1 to 173.2)           | 186.2 (167.4 to 208.8)       | 121.9<br>(109.8 to 135.5)    | 259.8 (232.3 to 291.1)       | 297.3 (260.1 to 345.5)         | 222 (198.5 to 249.2)         | 66.9 (57.3 to 81.6)     | 59.7 (45.5 to 83.5)   | 82.1 (71.4 to 92.2)   |
|       |                      | Prevalence | 4923.7<br>(4561.6 to 5264.9)        | 5681<br>(5243.5 to 6130.6)   | 4043.6<br>(3751.2 to 4341.5) | 6497.1<br>(6009.9 to 7016.7) | 7447.3<br>(6797.5 to 8223.9)   | 5520.7<br>(5091.9 to 5955.3) | 32 (26.6 to 39.4)       | 31.1 (23.8 to 43.5)   | 36.5 (30.7 to 42.6)   |
|       |                      | Deaths     | 6.5 (4.5 to 9.9)                    | 6.8 (4.4 to 11.2)            | 6.4 (4.1 to 9.6)             | 5.8 (4 to 8.3)               | 6.2 (4.3 to 9.1)               | 5.4 (3.5 to 8.1)             | -11 (-32.9 to 16.4)     | -8.2 (-34.7 to 25)    | -15.2 (-37 to 14.8)   |
|       |                      | DALYs      | 215.4<br>(159.1 to 298.9)           | 242.9 (173.2 to 363.8)       | 186.5 (131 to 258)           | 203.9 (156.1 to 263.8)       | 236.6 (181.9 to 308.1)         | 170.6 (124.7 to 228.1)       | -5.3 (-25.9 to 20.7)    | -2.6 (-28.2 to 27)    | -8.5 (-30.8 to 25.1)  |
|       |                      | YLLs       | 169.7<br>(117.2 to 247.6)           | 181.6 (116.8 to 303.5)       | 158.9<br>(105.5 to 226.9)    | 135.9 (95.1 to 191.9)        | 145.8 (101 to 213.1)           | 125.8 (83.6 to 180.7)        | -19.9 (-41.6 to 10.2)   | -19.7 (-45 to 14.7)   | -20.8 (-43.5 to 16.3) |
|       |                      | YLDs       | 45.7 (33 to 61.3)                   | 61.3 (43.7 to 82)            | 27.6 (19.4 to 37.3)          | 68 (48.6 to 89.3)            | 90.8 (63.8 to 122.9)           | 44.8 (32.1 to 61.1)          | 48.8 (32.4 to 68.8)     | 48.2 (28.5 to 76.5)   | 62.1 (39.9 to 86.5)   |

Data in parentheses are 95% Uncertainty Intervals (95% UIs)
